# Supplementary material for: The Synthesis of α-Aminophosphonates via Enantioselective Organocatalytic Reaction of 1-(N-Acylamino)alkylphosphonium Salts with Dimethyl Phosphite
Source: PubMed Central journal article supplement (PMC7024258; doi:10.3390/molecules25020405), 2020-01-18

(Article)

# The Synthesis of $\alpha$ -Aminophosphonates via Enantioselective Organocatalytic Reaction of 1-(*N*-Acylamino)alkylphosphonium Salts with Dimethyl Phosphite

Alicja Wałęcka-Kurczyk <sup>1,2</sup>, Krzysztof Walczak<sup>1</sup>, Anna Kuźnik <sup>1,2</sup>, Sebastian Stecko <sup>3</sup> and Agnieszka Październiak-Holewa <sup>1,2,\*</sup>

<sup>1</sup> Department of Organic Chemistry, Bioorganic Chemistry and Biotechnology, Silesian University of Technology, B. Krzywoustego 4, 44-100 Gliwice, Poland; alicja.walecka-kurczyk@polsl.pl, krzysztof.walczak@polsl.pl, anna.kuznik@polsl.pl

<sup>2</sup> Biotechnology Center of Silesian University of Technology, B. Krzywoustego 8, 44-100 Gliwice, Poland

<sup>3</sup> Institute of Organic Chemistry, Polish Academy of Sciences, Kasprzaka 44/52, 01-224 Warsaw, Poland, sebastian.stecko@icho.edu.pl

\* Correspondence: agnieszka.pazdzierniak-holewa@polsl.pl; Tel.: +48 032-237-2218; fax: +48 032-237-2094

## Supporting information

### Table of contents

1. <sup>1</sup>H NMR, <sup>13</sup>C NMR, <sup>31</sup>P NMR and HRMS of 1-(*N*-acylamino)alkyltriphenylphosphonium tetrafluorobrates **2g-i**.....S2
2. <sup>1</sup>H NMR, <sup>13</sup>C NMR, <sup>31</sup>P NMR and HRMS of *N*-[1-(dimethoxyphosphoryl)alkyl]carbamates **3**.....S14
3. HPLC data of *N*-[1-(dimethoxyphosphoryl)alkyl]carbamates **3**.....S50
4. Results of the SDE test via achiral flash chromatography.....S80

<sup>1</sup>H NMR [400 MHz/CDCl<sub>3</sub>/TMS]: 1-(*N*-Benzyloxycarbonylamino)butyltriphenylphosphonium tetrafluoroborate (**2g**)

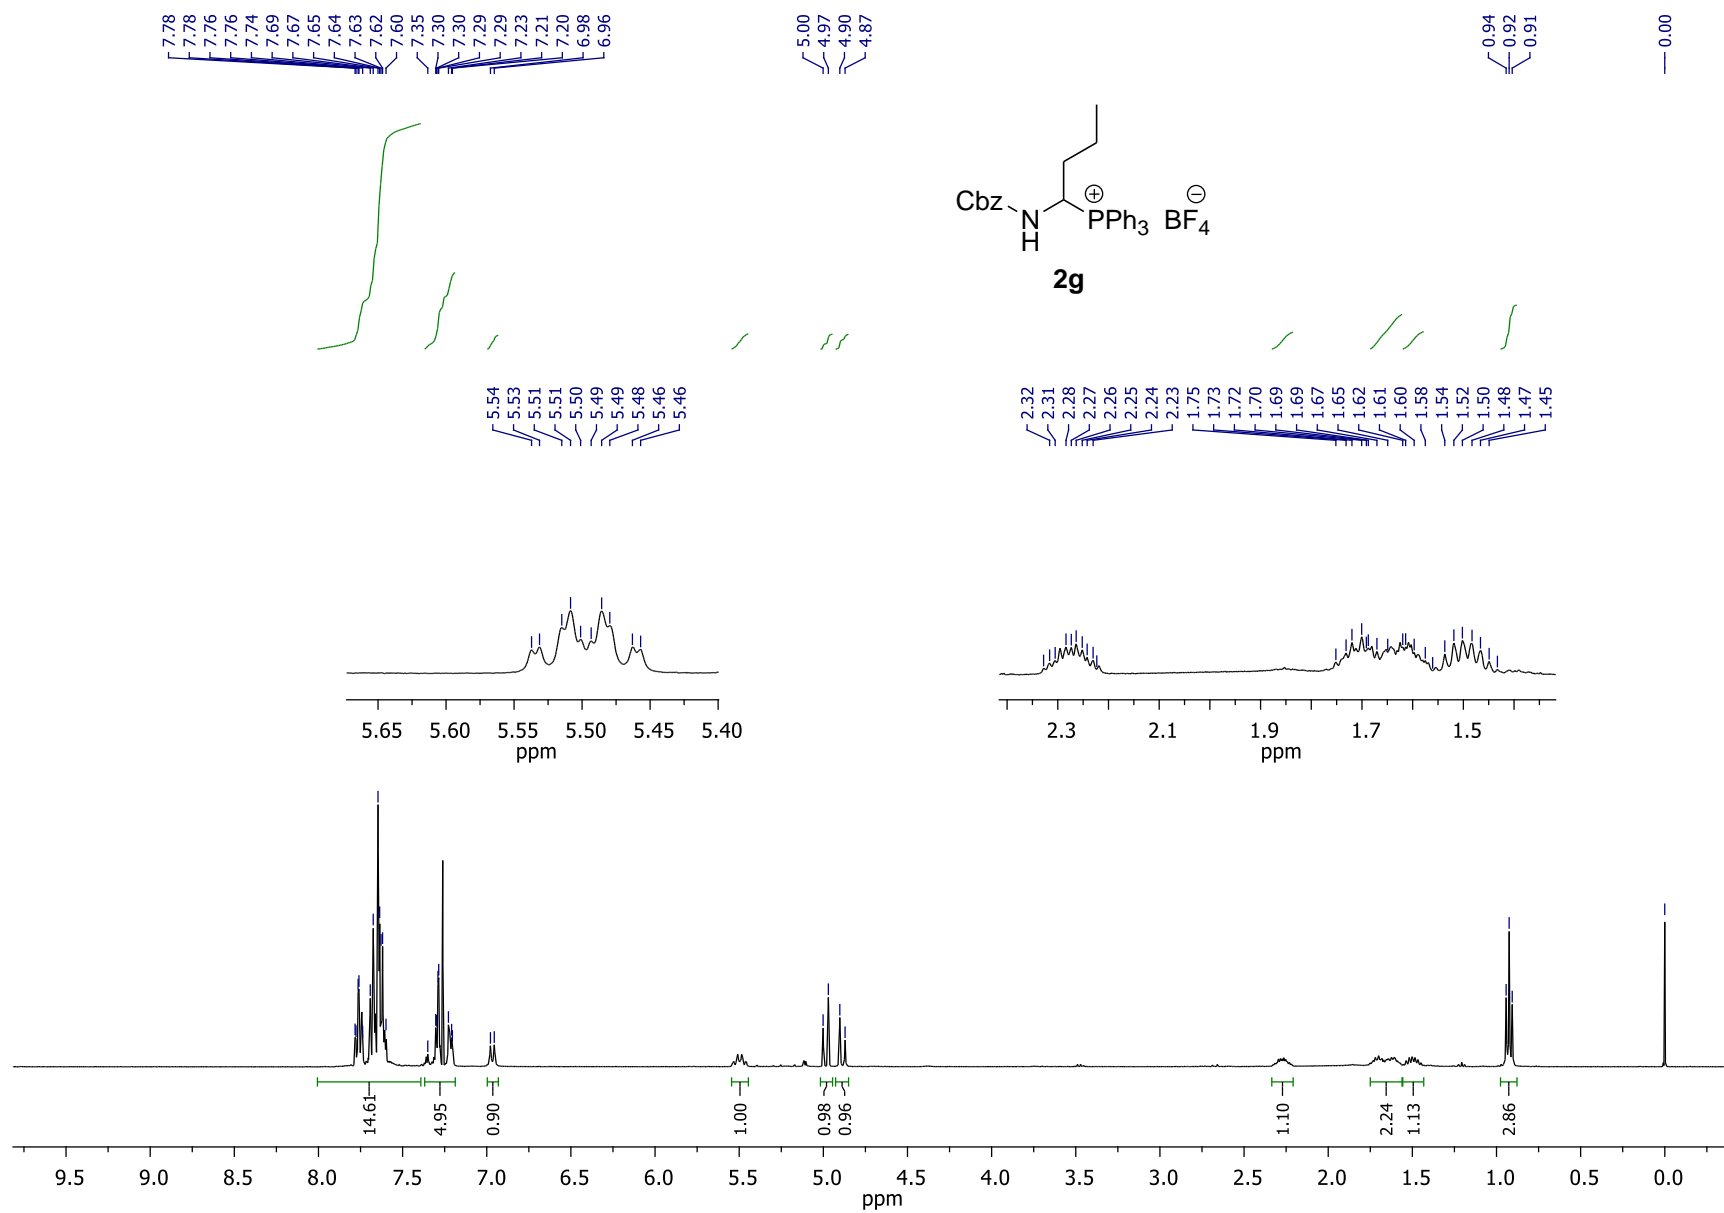

$^{13}\text{C}$  NMR [100 MHz/ $\text{CDCl}_3$ ]: 1-(*N*-Benzyloxycarbonylamino)butyltriphenylphosphonium tetrafluoroborate (**2g**)

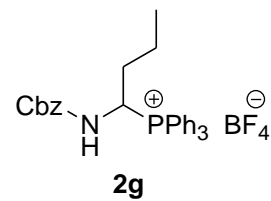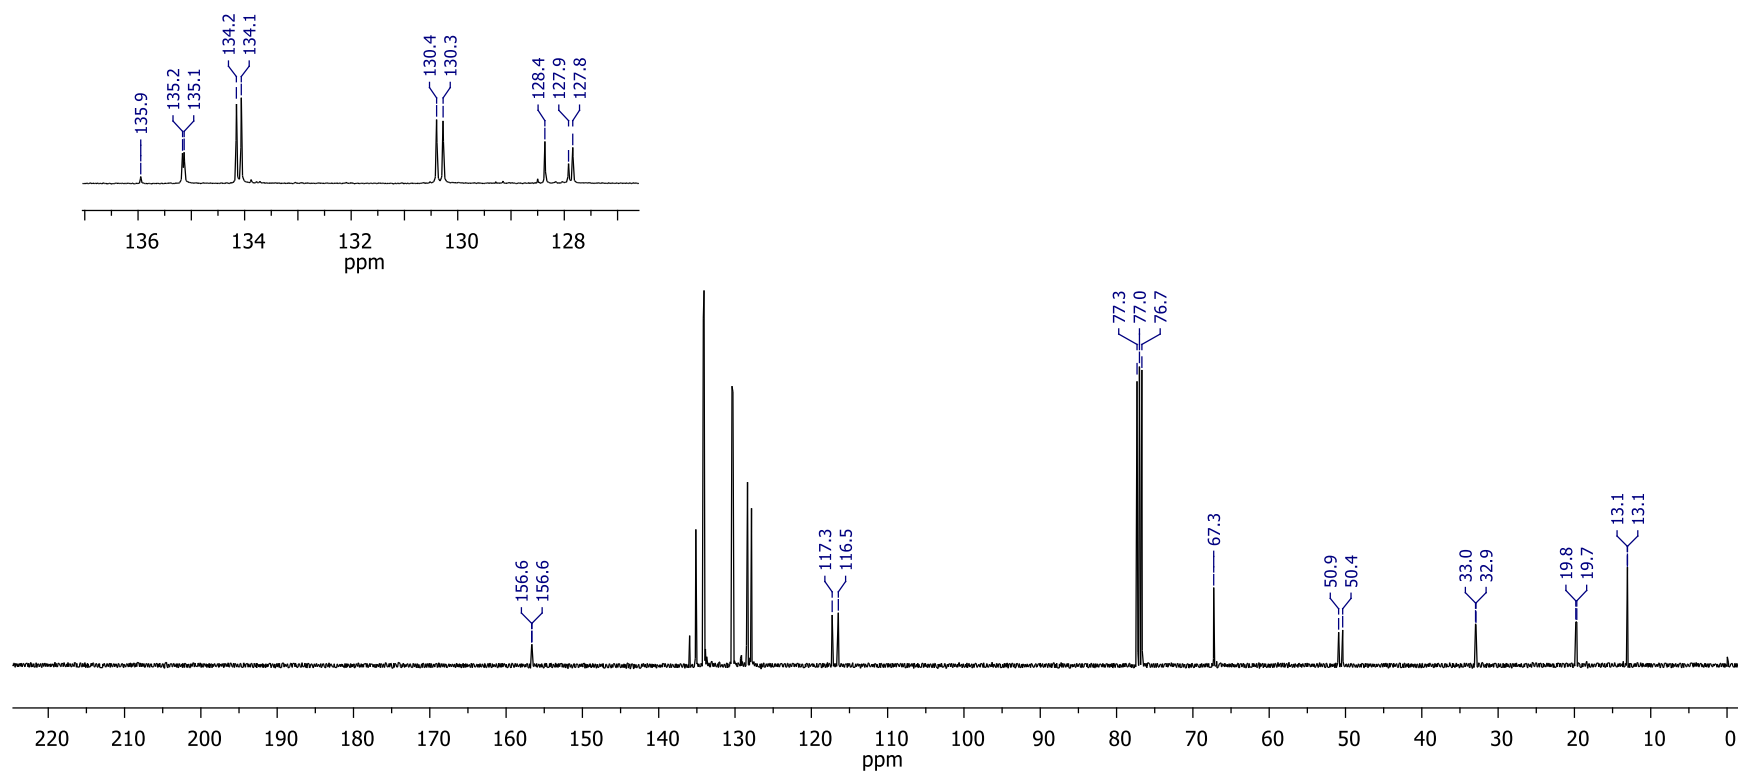

$^{31}\text{P}$  NMR [162 MHz/ $\text{CDCl}_3$ ]: 1-(*N*-Benzyloxycarbonylamino)butyltriphenylphosphonium tetrafluoroborate (**2g**)

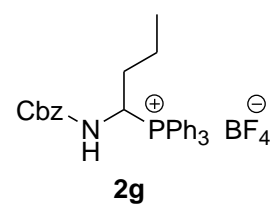

— 25.5

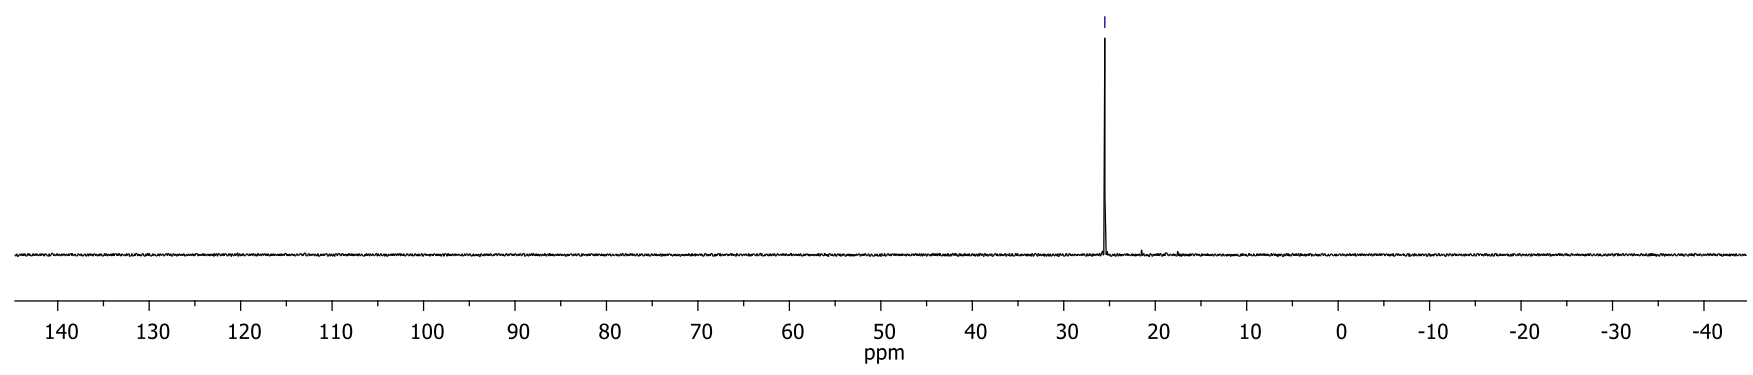

# HRMS: 1-(*N*-Benzyloxycarbonylamino)butyltriphenylphosphonium tetrafluoroborate (**2g**)

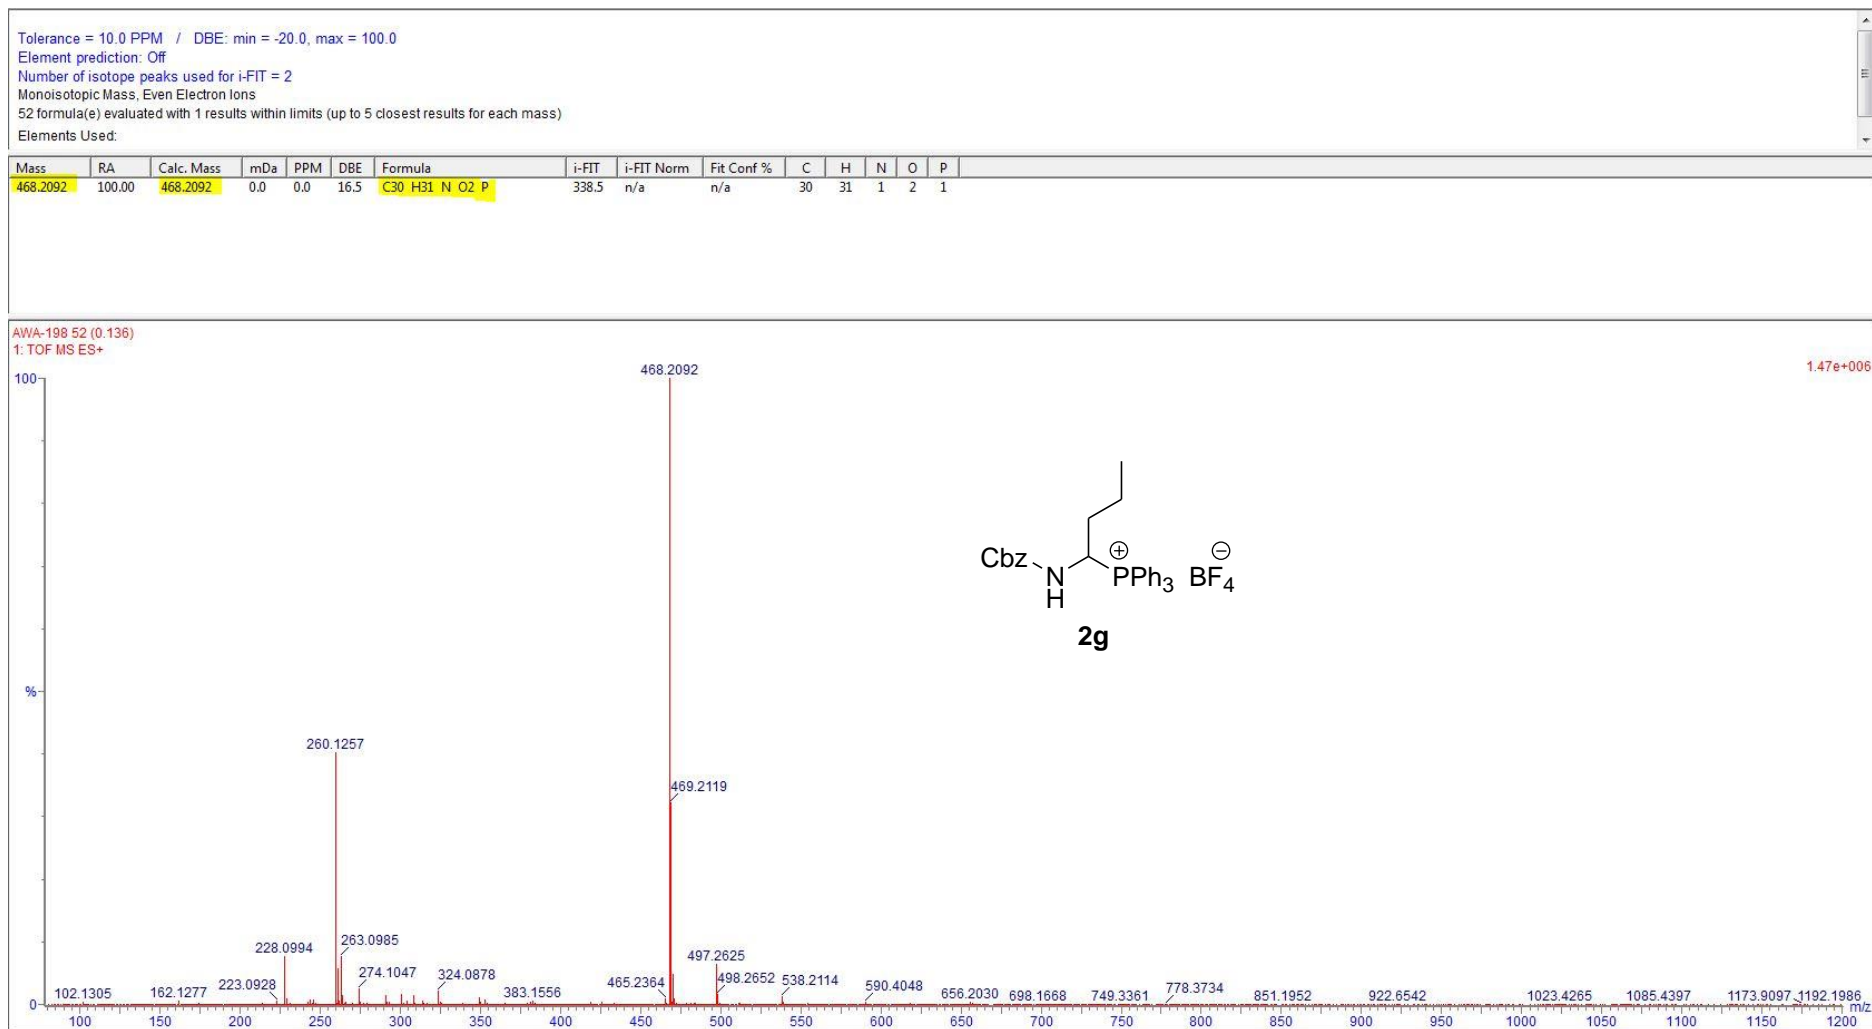

$^1\text{H}$  NMR [400 MHz/ $\text{CDCl}_3$ /TMS]: 1-(*N*-Benzyloxycarbonylamino)pentyltriphenylphosphonium tetrafluoroborate (**2h**)

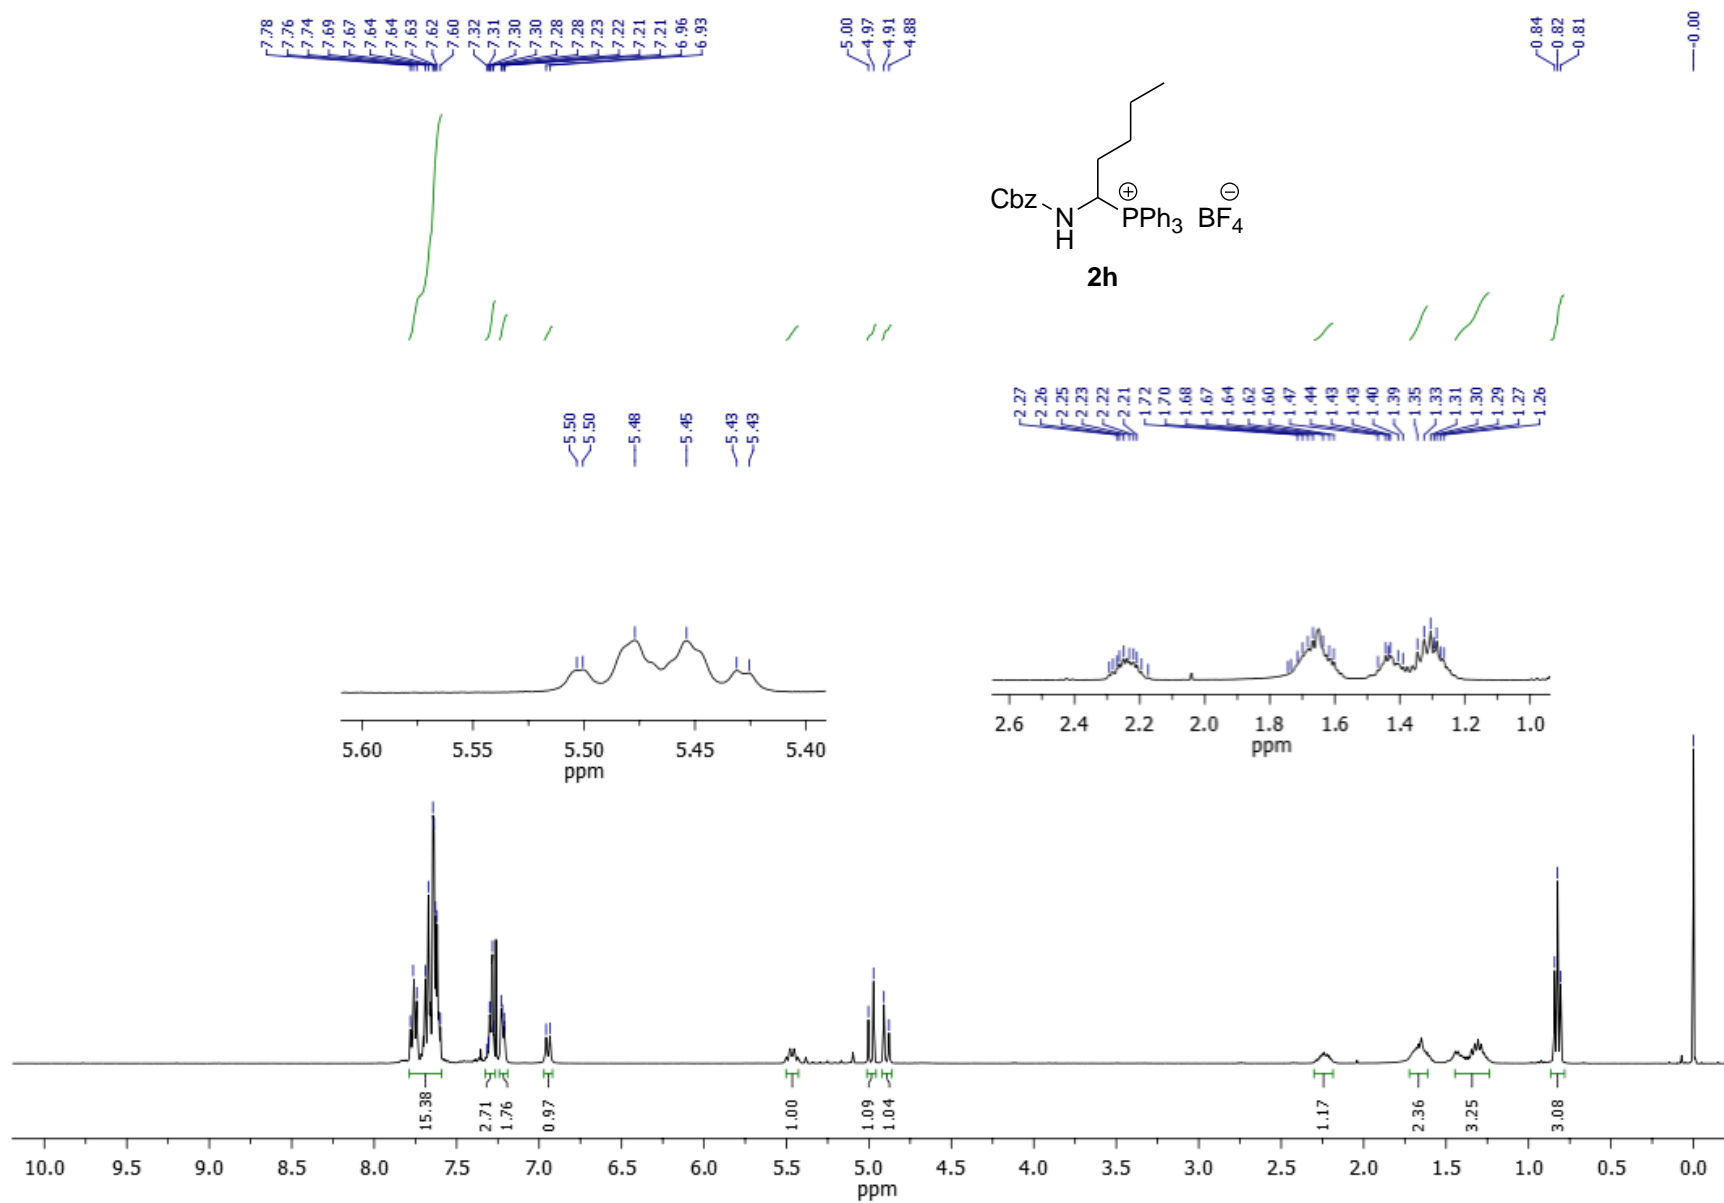

<sup>13</sup>C NMR [100 MHz/CDCl<sub>3</sub>]: 1-(*N*-Benzyloxycarbonylamino)pentyltriphenylphosphonium tetrafluoroborate (**2h**)

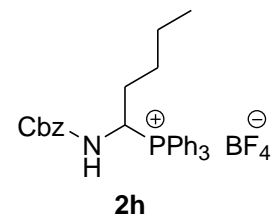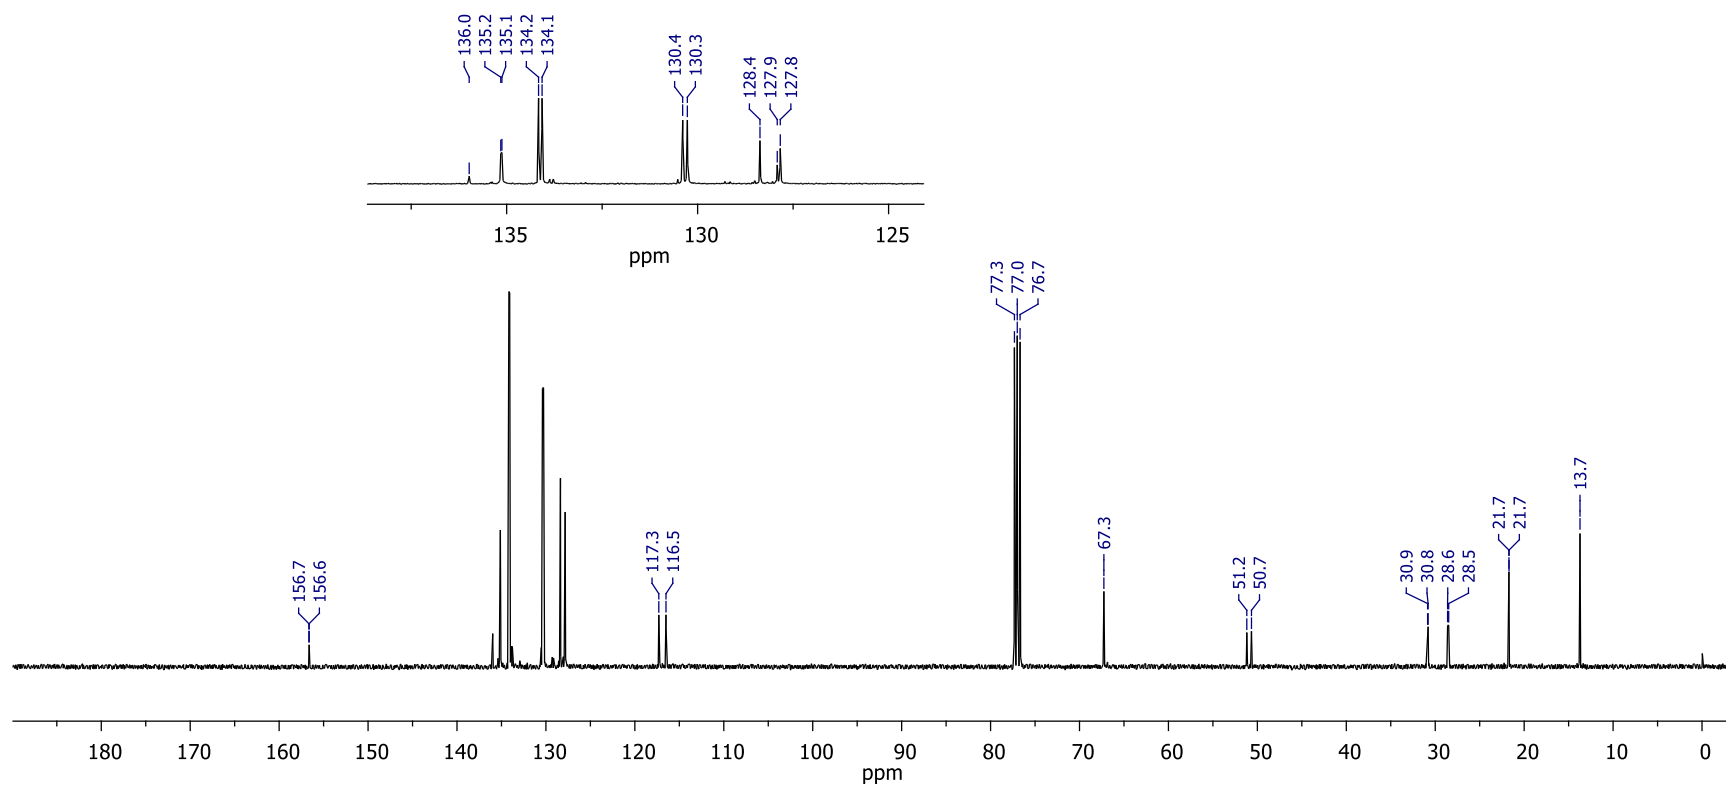

$^{31}\text{P}$  NMR [162 MHz/ $\text{CDCl}_3$ ]: 1-(*N*-Benzyloxycarbonylamino)pentyltriphenylphosphonium tetrafluoroborate (**2h**)

— 25.5

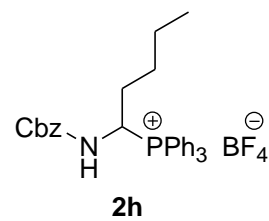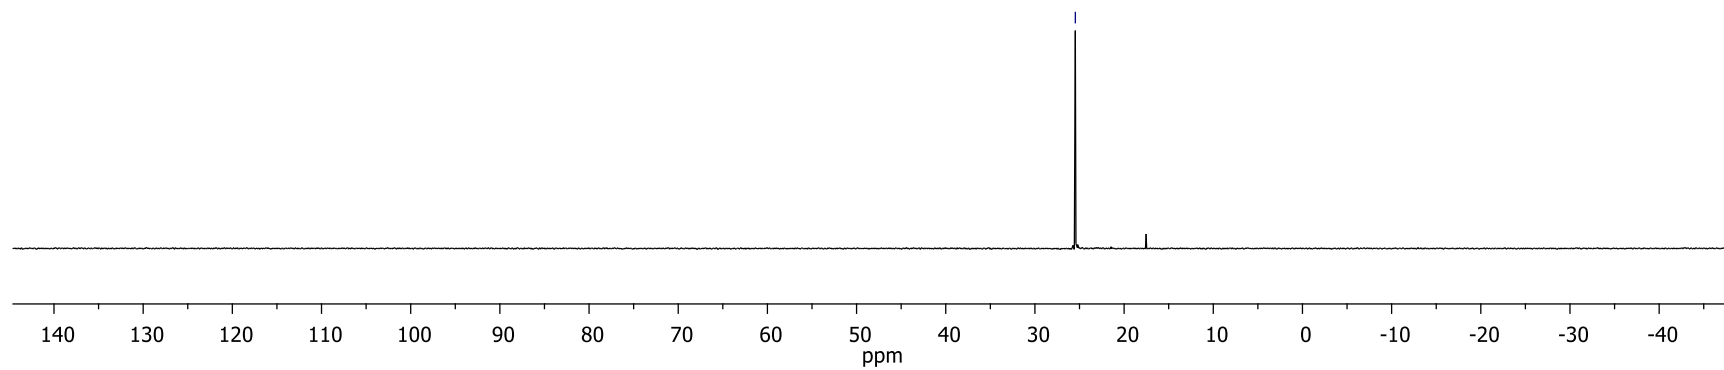

S8



HRMS: 1-(*N*-Benzyloxycarbonylamino)pentyltriphenylphosphonium tetrafluoroborate (**2h**)

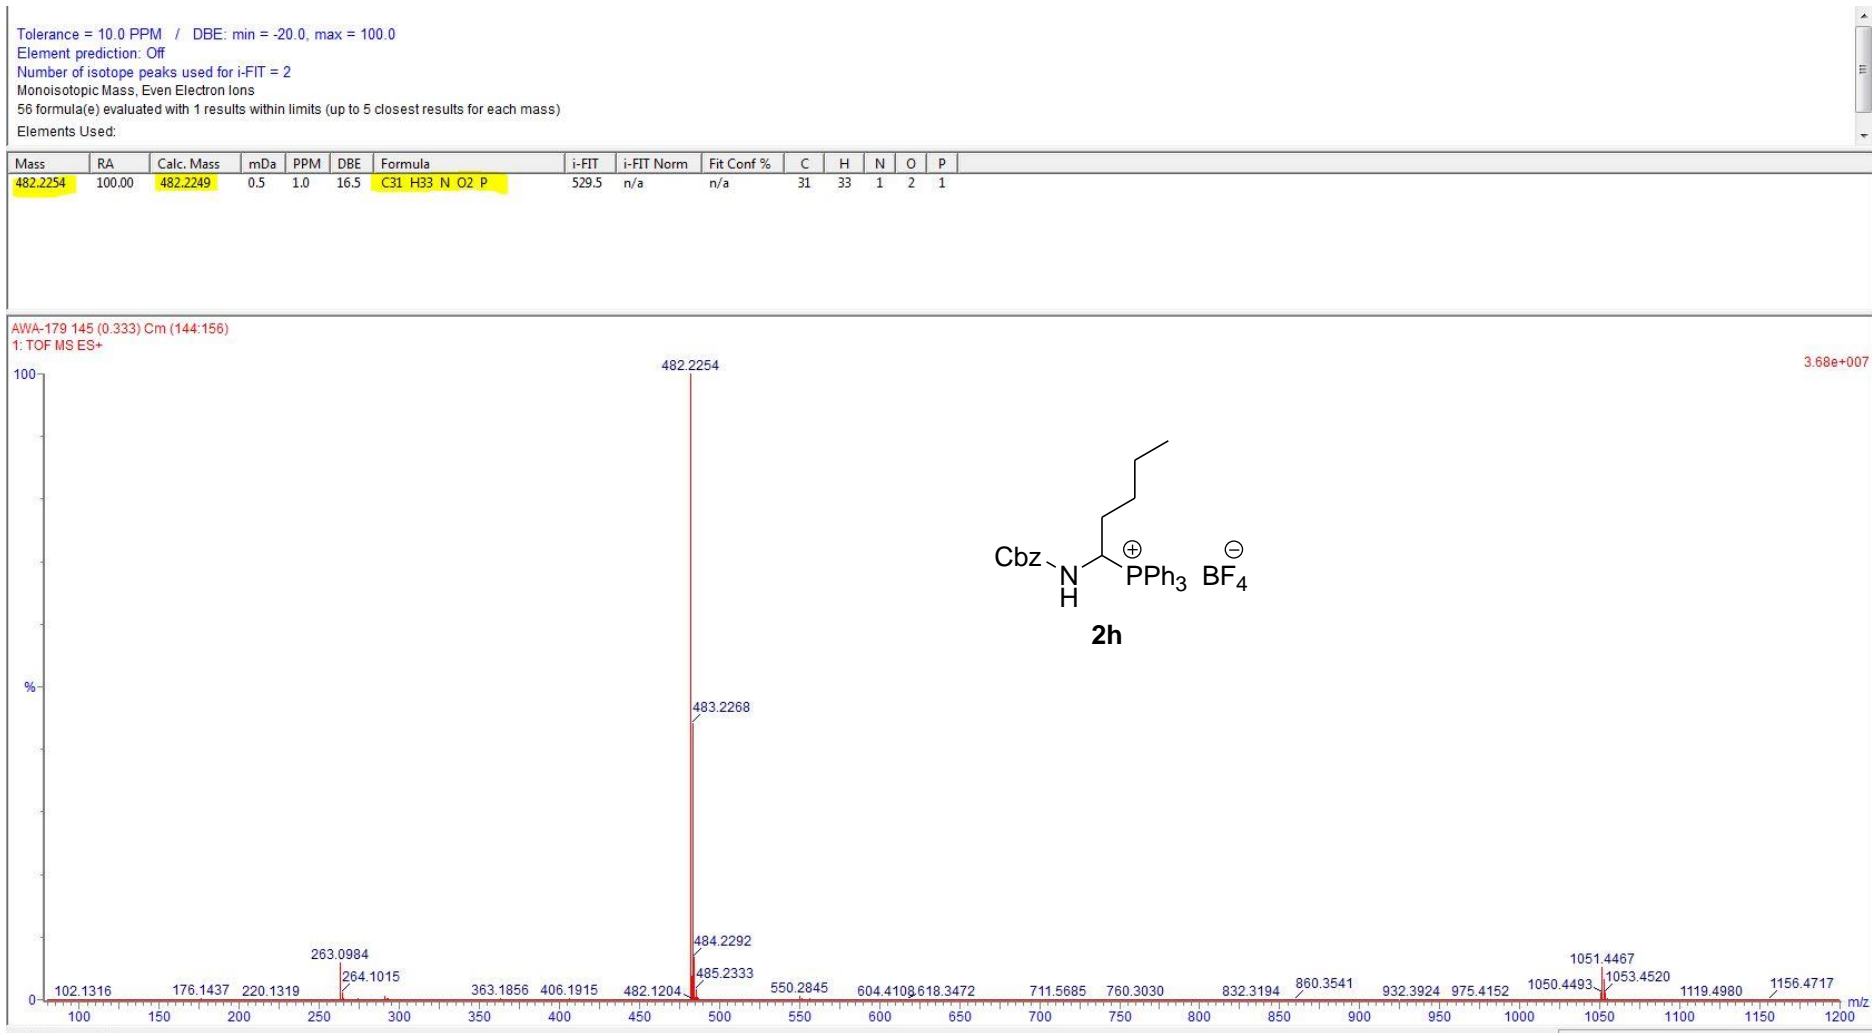

$^1\text{H}$  NMR [400 MHz/ $\text{CDCl}_3$ /TMS]: 1-(*N*-Benzyloxycarbonylamino)cyclohexylmethyltriphenylphosphonium tetrafluoroborate (**2i**)

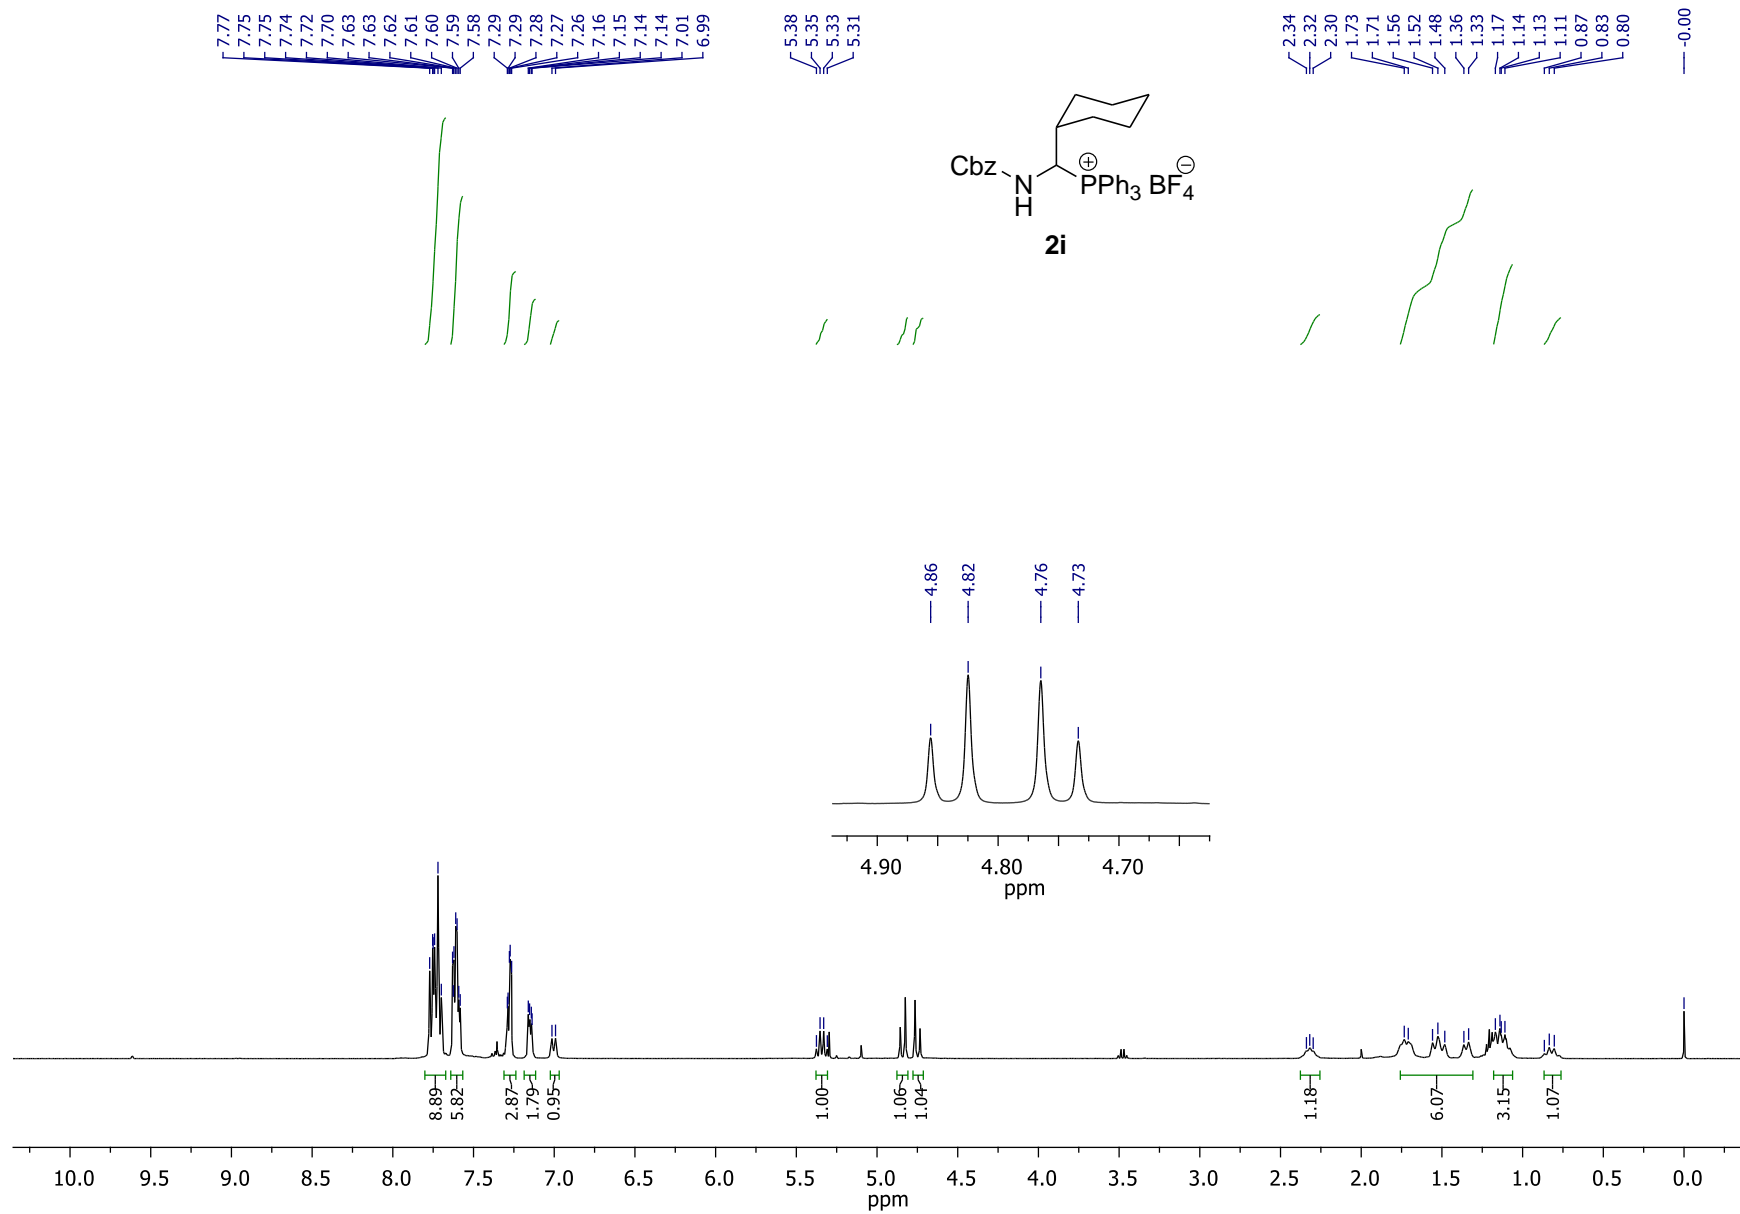

<sup>13</sup>C NMR [100 MHz/CDCl<sub>3</sub>]: 1-(*N*-Benzyloxycarbonylamino)cyclohexylmethyltriphenylphosphonium tetrafluoroborate (**2i**)

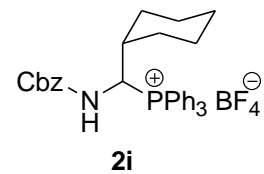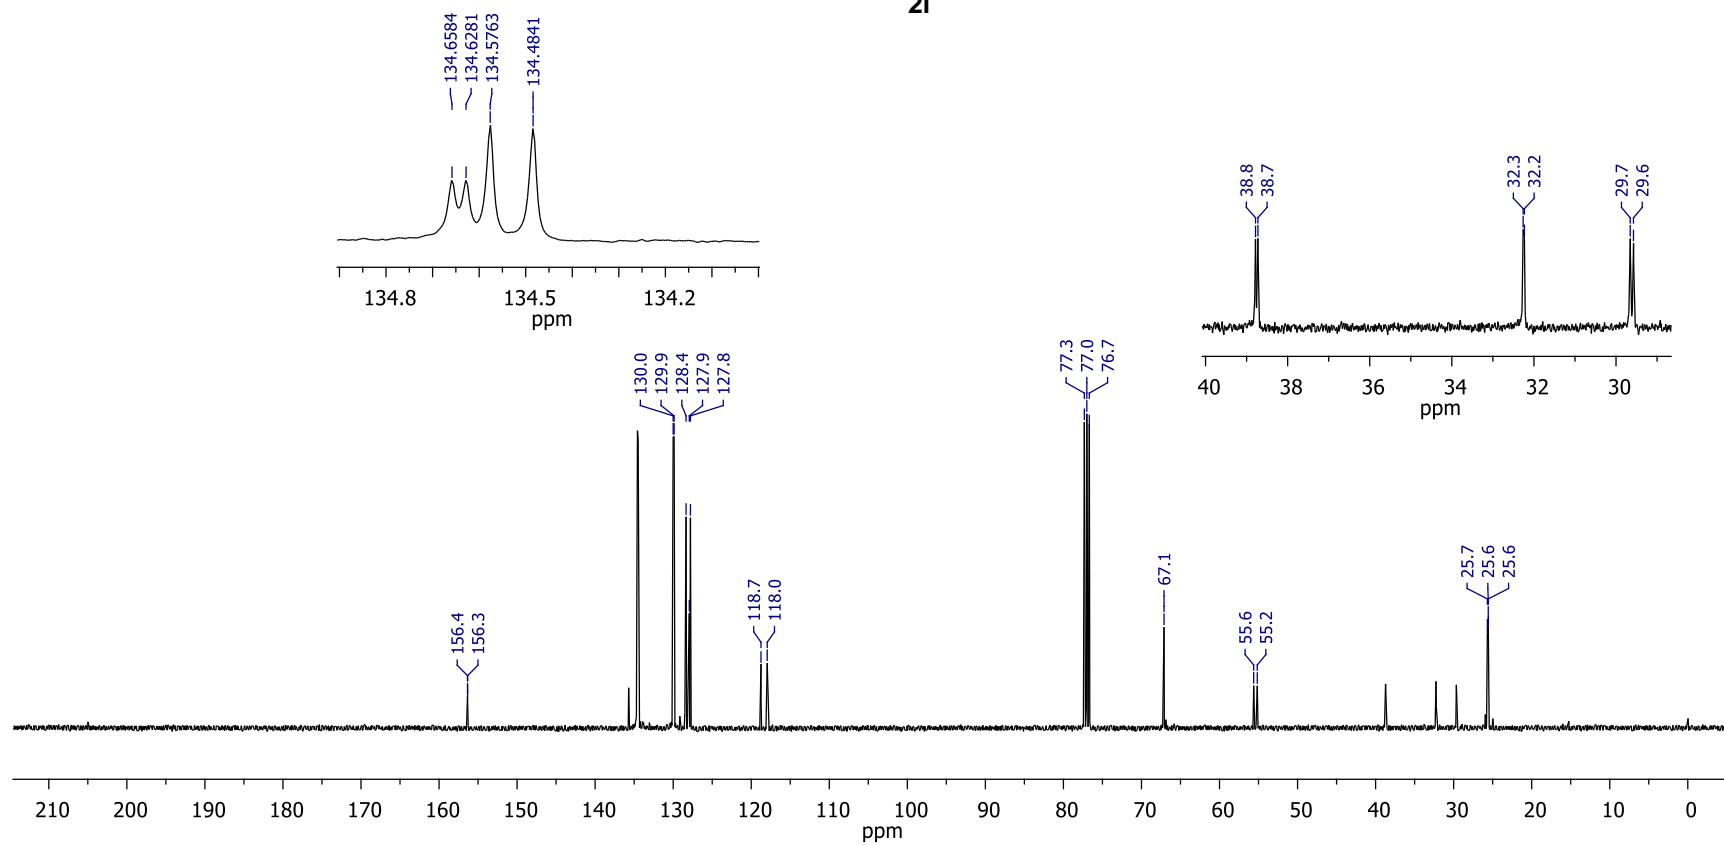

$^{31}\text{P}$  NMR [162 MHz/ $\text{CDCl}_3$ ]: 1-(*N*-Benzyloxycarbonylamino)cyclohexylmethyltriphenylphosphonium tetrafluoroborate (**2i**)

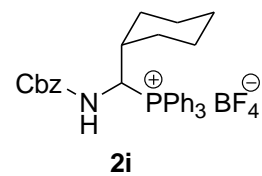

— 27.4

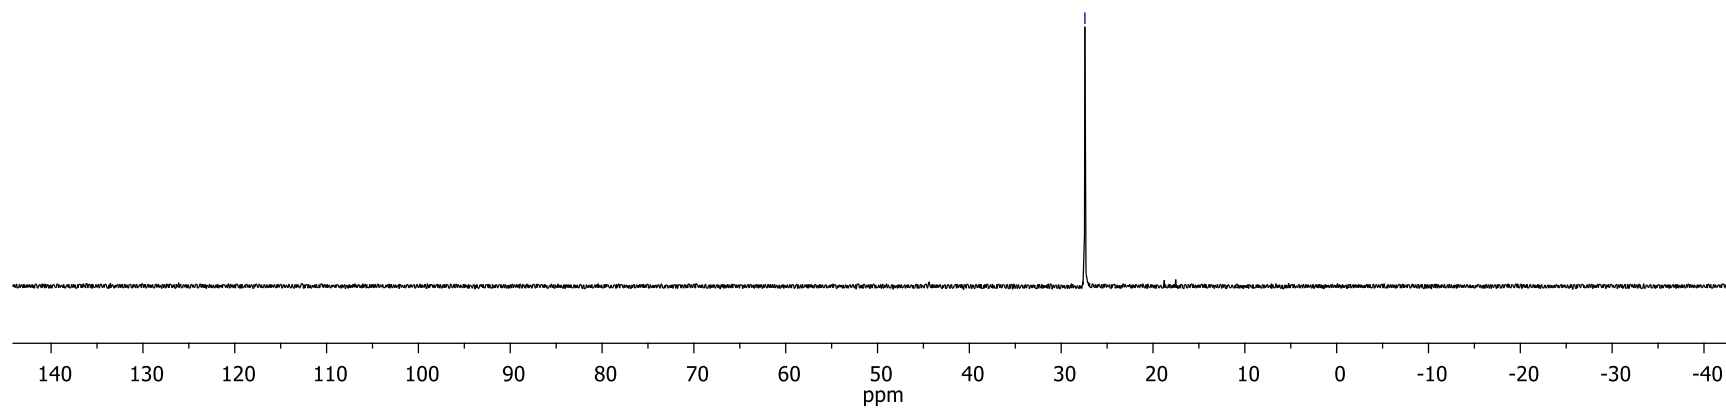

S12

HRMS: 1-(*N*-Benzyloxycarbonylamino)cyclohexylmethyltriphenylphosphonium tetrafluoroborate (**2i**)

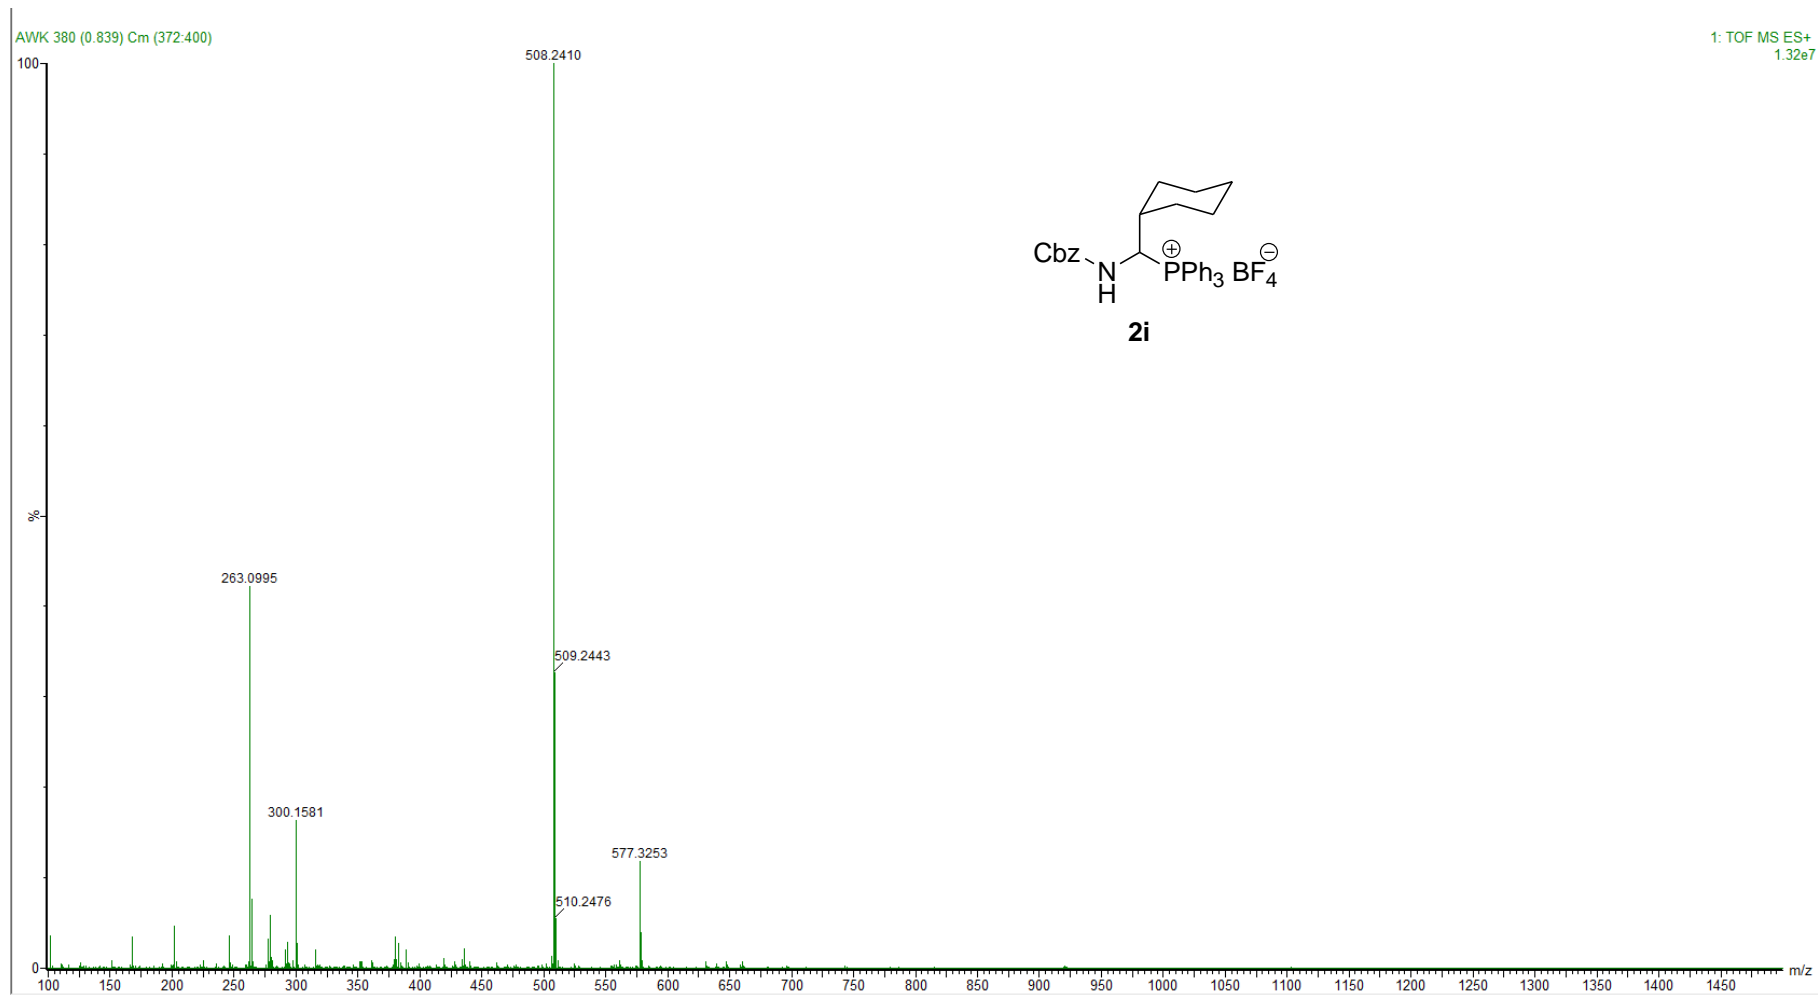

<sup>1</sup>H NMR [400 MHz/CDCl<sub>3</sub>/TMS]: (*R*)-Benzyl *N*-[1-(dimethoxyphosphoryl)ethyl]carbamate (**3a**)

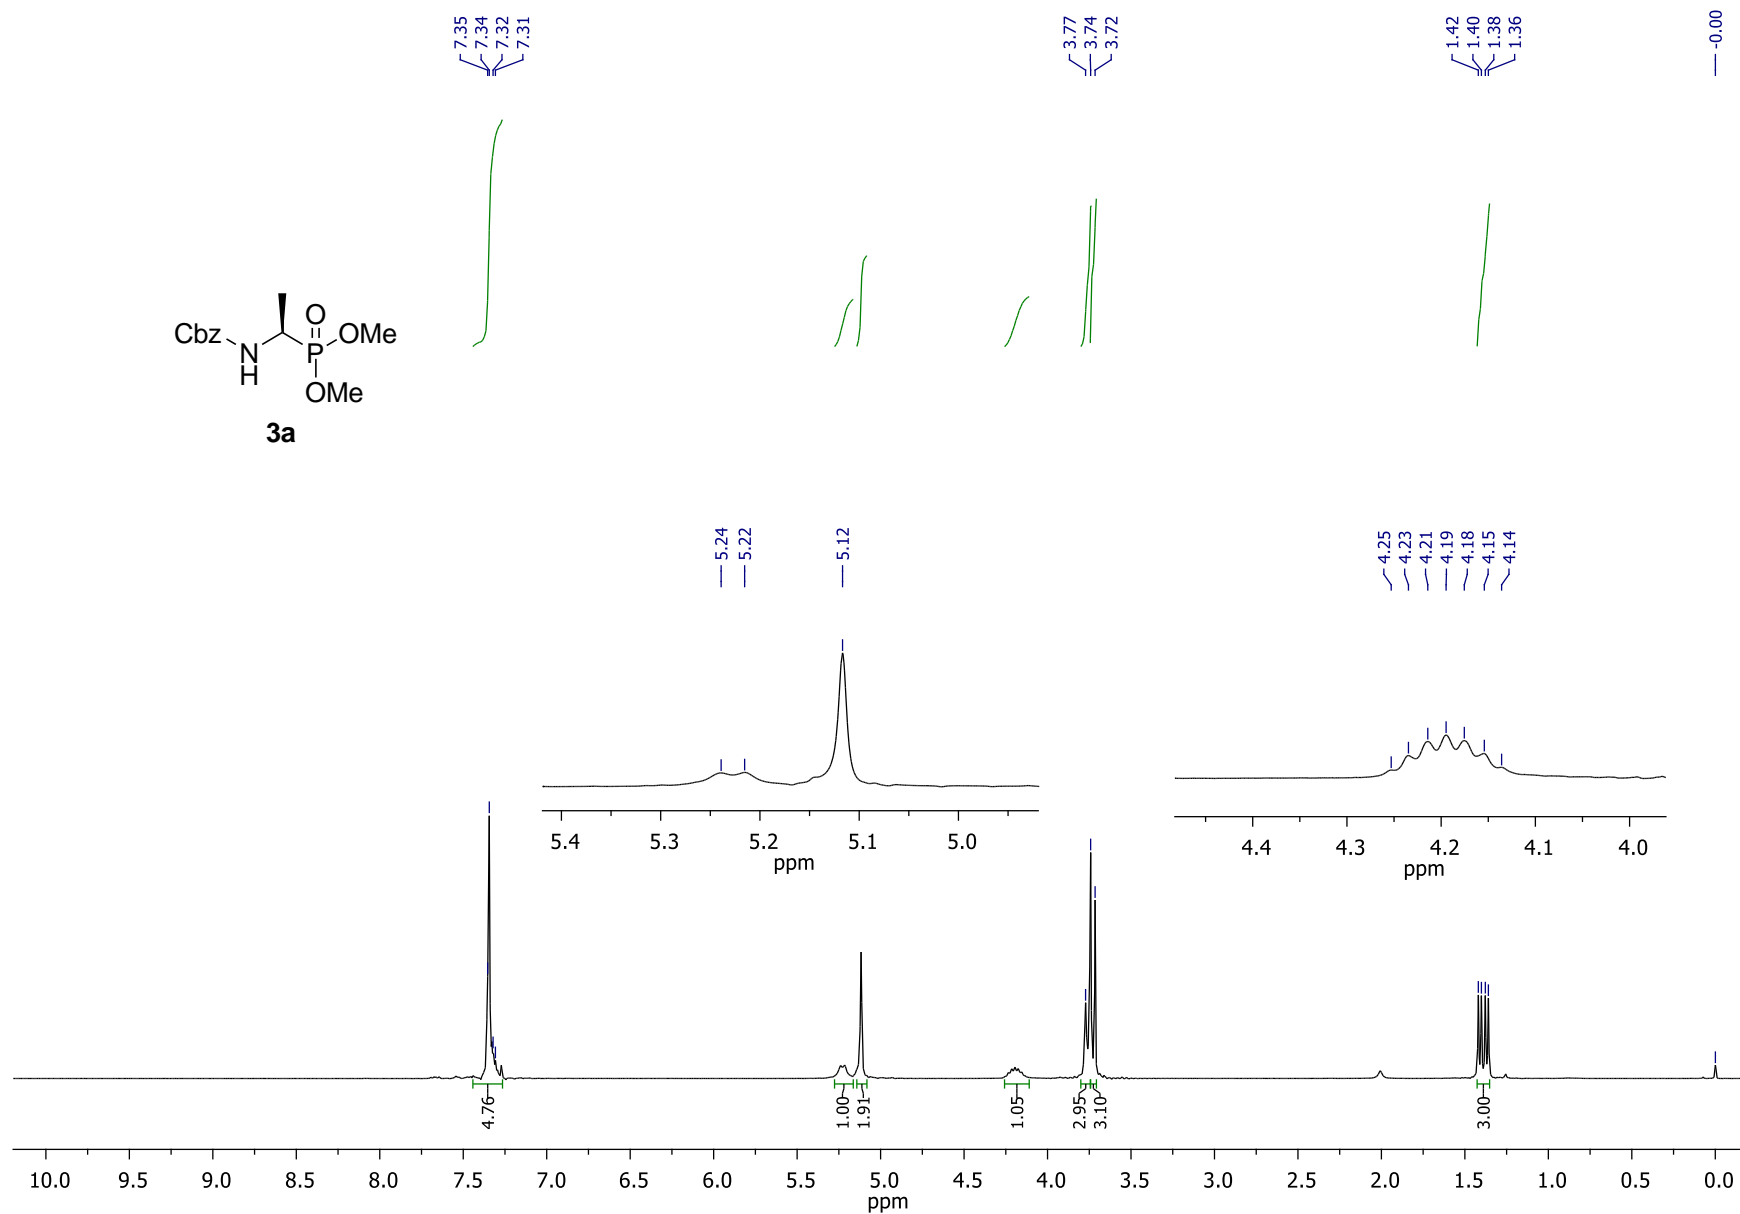

<sup>13</sup>C NMR [100 MHz/CDCl<sub>3</sub>]: (*R*)-Benzyl *N*-[1-(dimethoxyphosphoryl)ethyl]carbamate (**3a**)

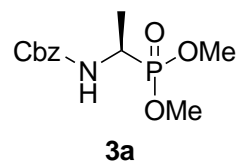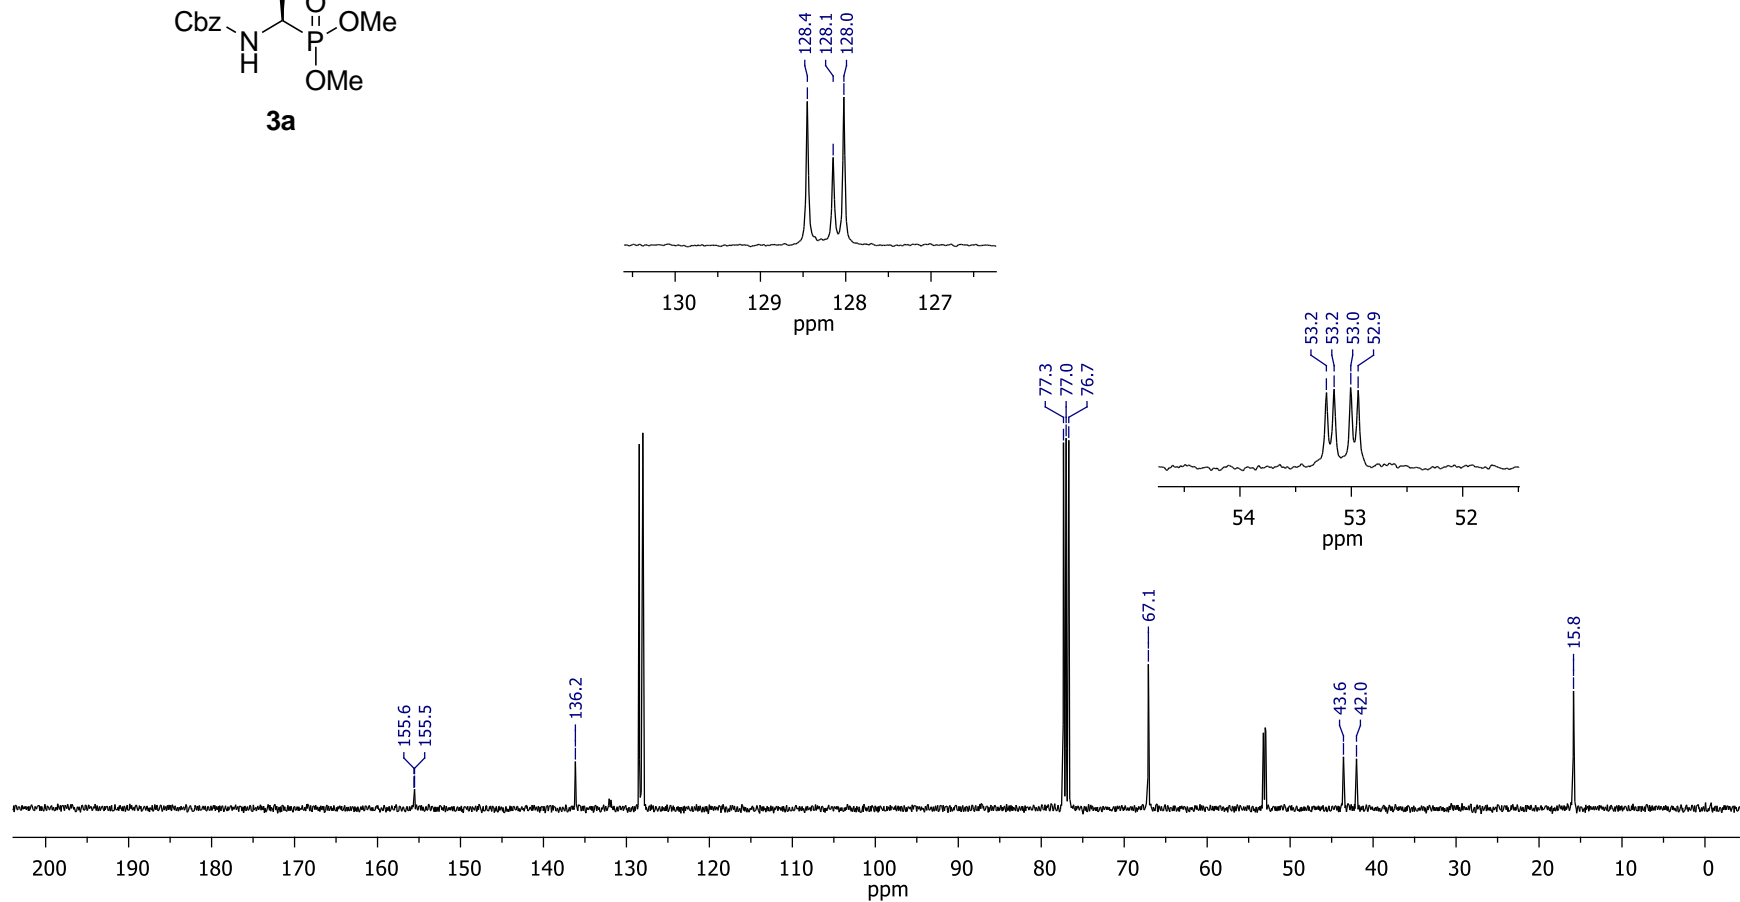

<sup>31</sup>P NMR [162 MHz/CDCl<sub>3</sub>]: (*R*)-Benzyl *N*-[1-(dimethoxyphosphoryl)ethyl]carbamate (**3a**)

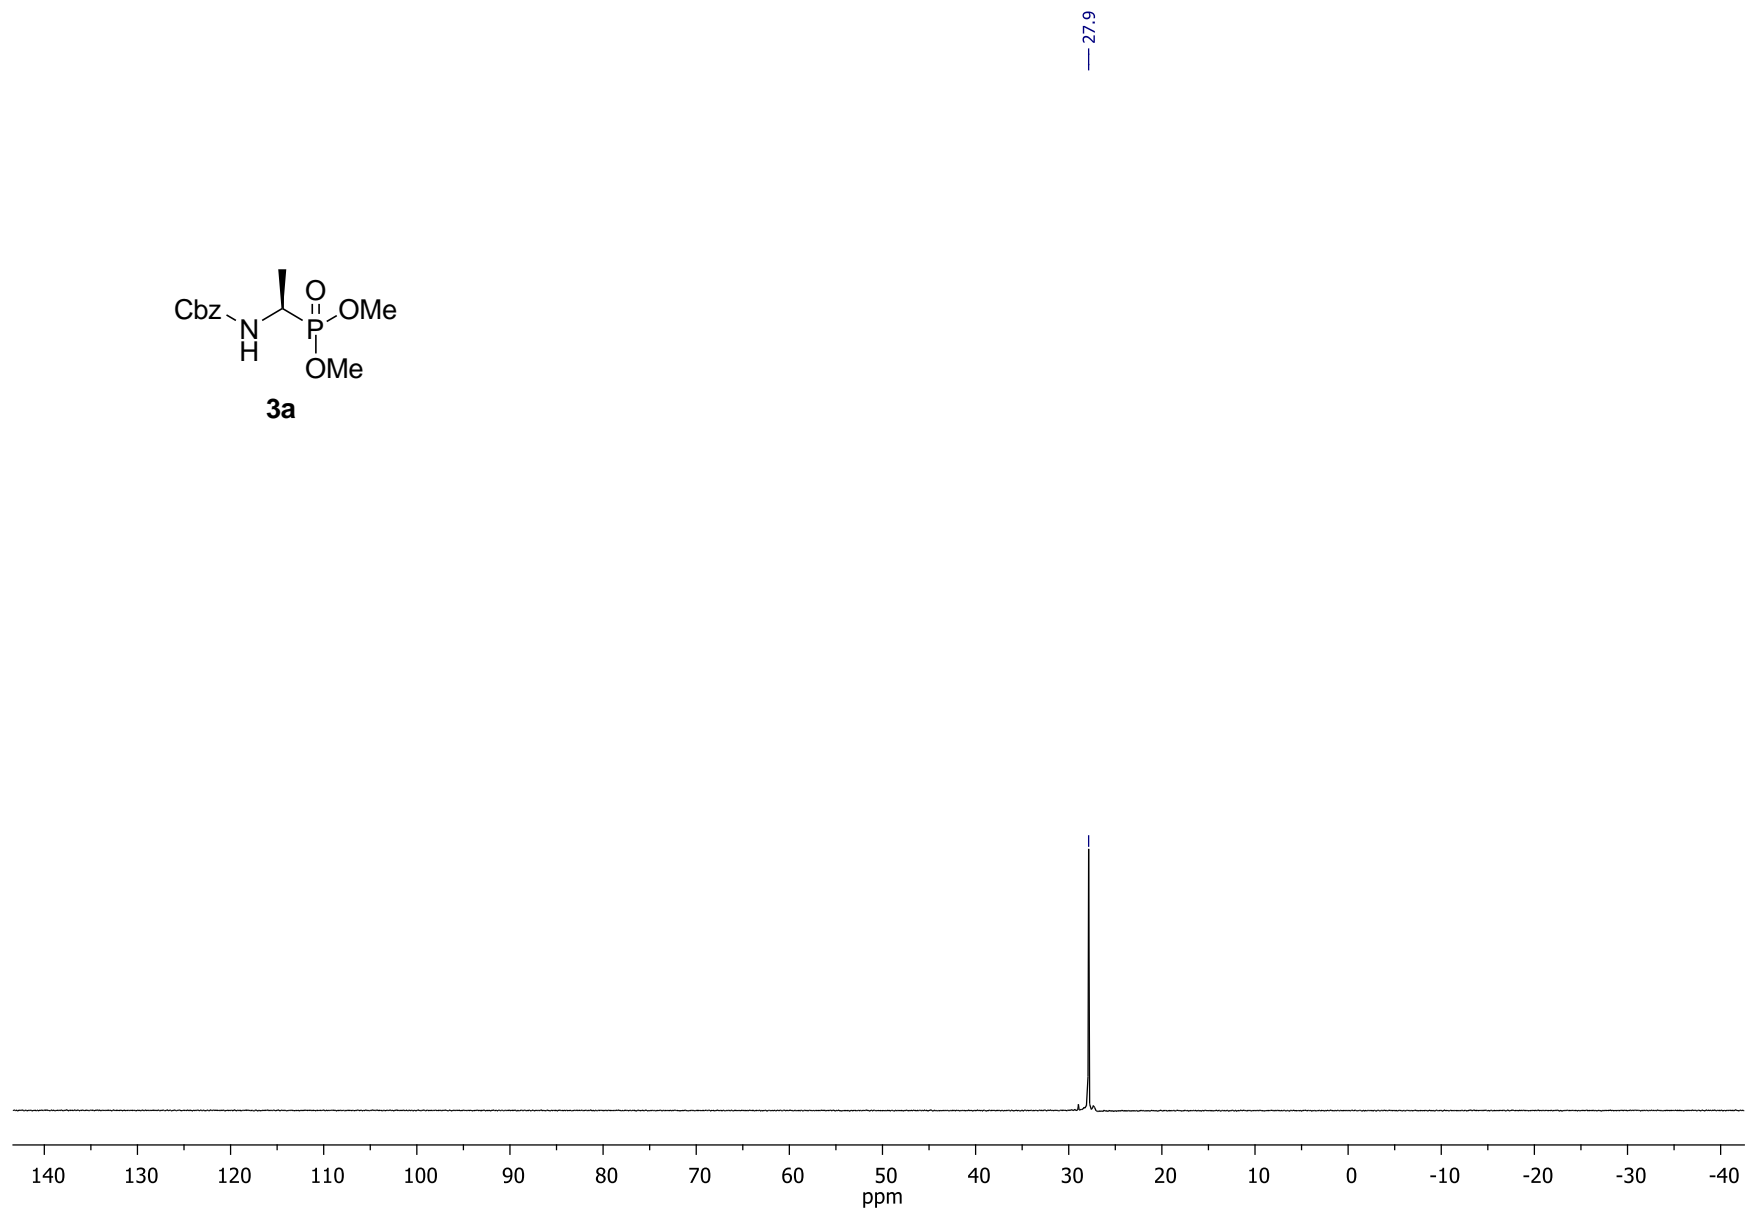

S16



<sup>1</sup>H NMR [400 MHz/CDCl<sub>3</sub>/TMS]: (*R*)-Benzyl *N*-[1-(dimethoxyphosphoryl)-2-phenylethyl]carbamate (**3b**)

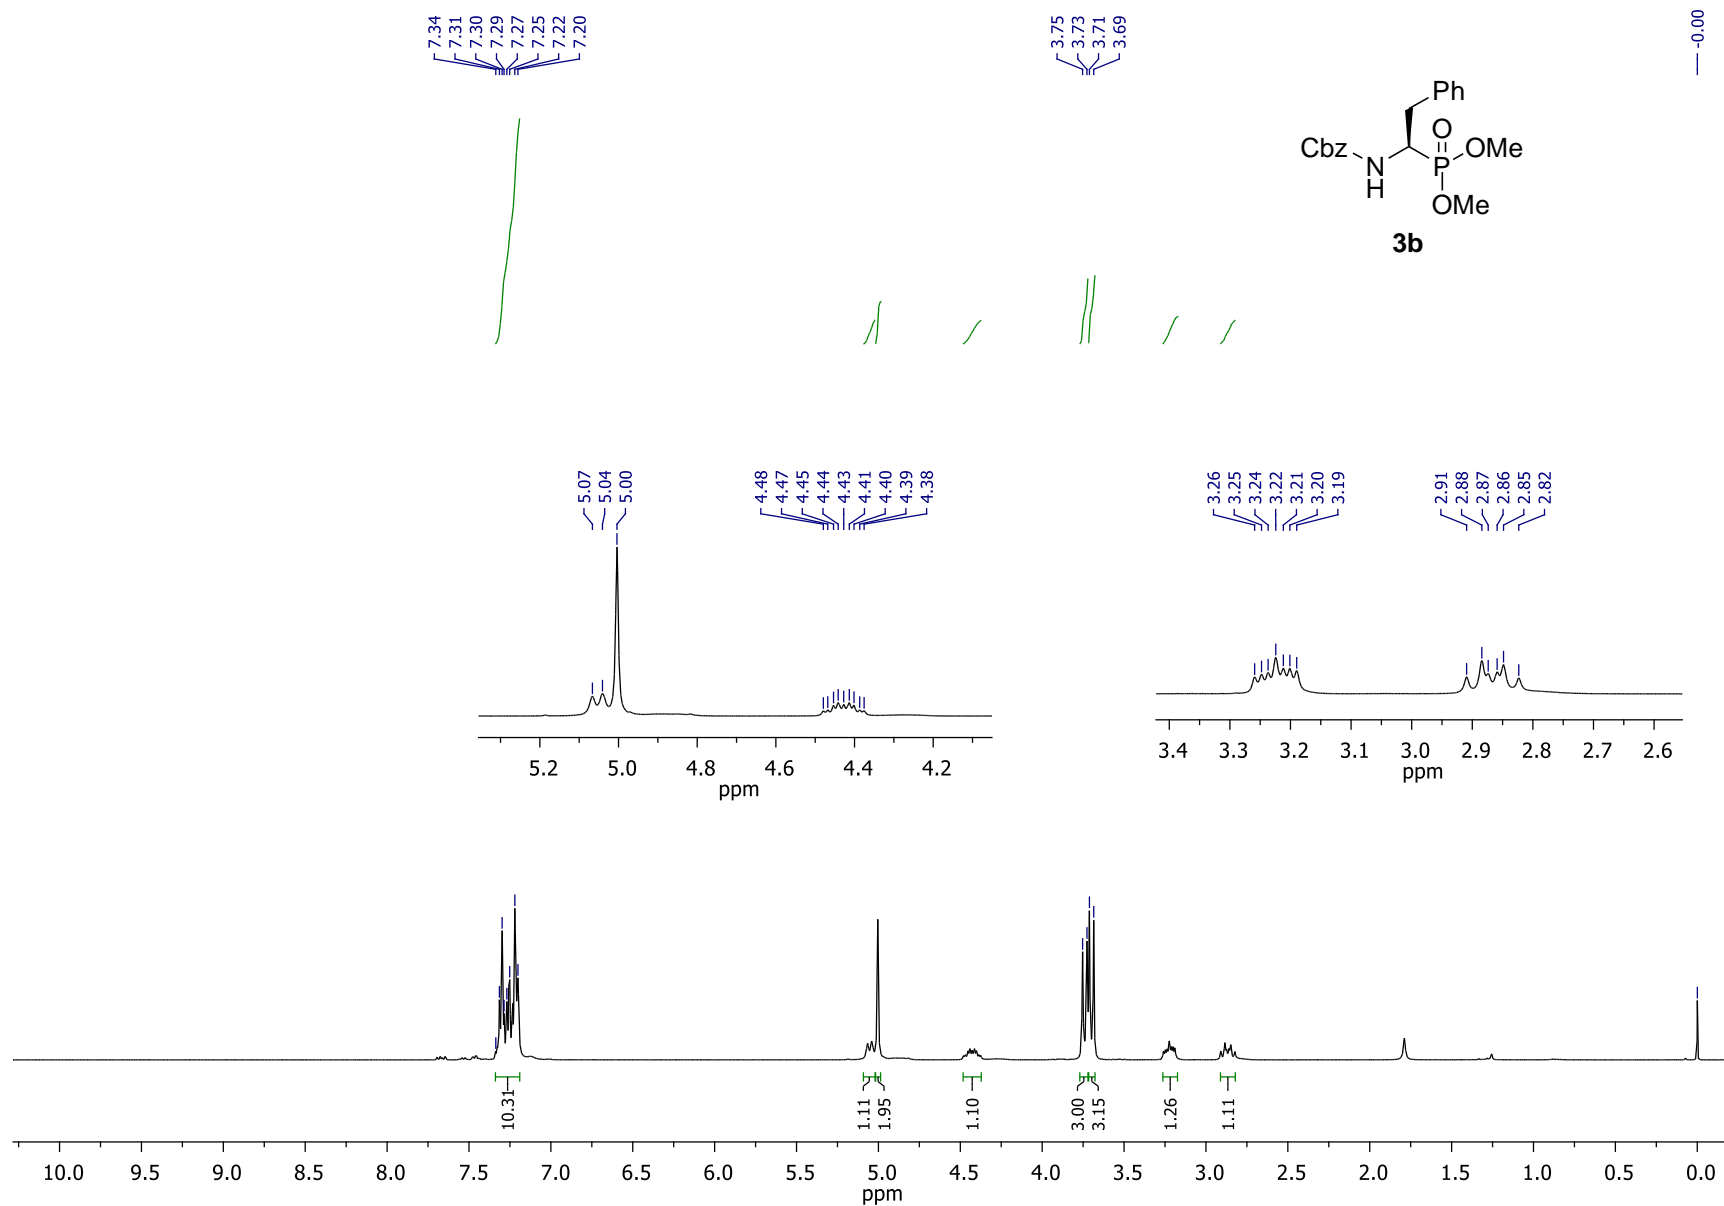

$^{13}\text{C}$  NMR [100 MHz/ $\text{CDCl}_3$ ]: (*R*)-Benzyl *N*-[1-(dimethoxyphosphoryl)-2-phenylethyl]carbamate (**3b**)

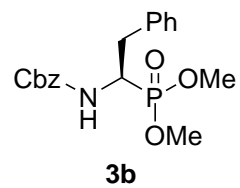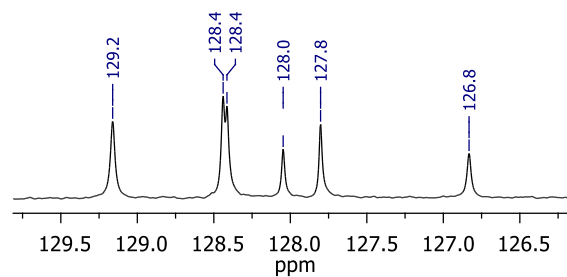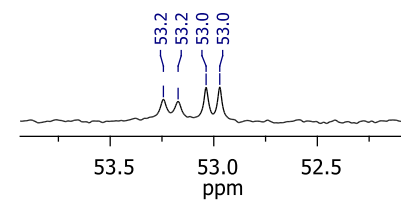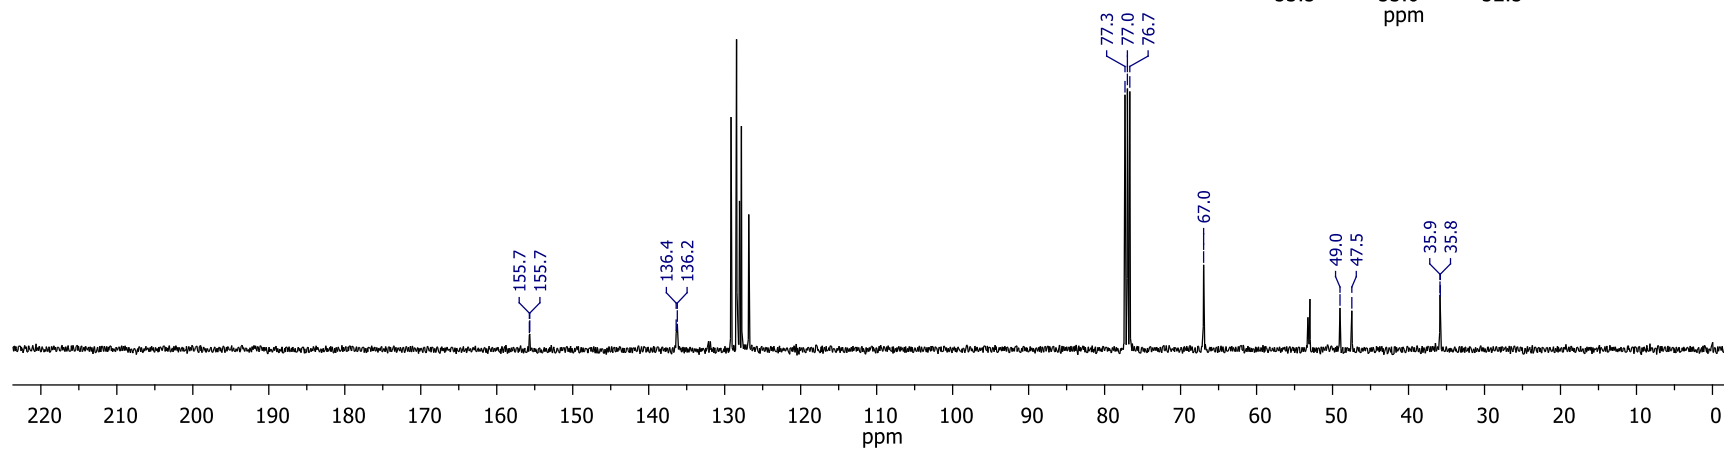

$^{31}\text{P}$  NMR [162 MHz/ $\text{CDCl}_3$ ]: (*R*)-Benzyl *N*-[1-(dimethoxyphosphoryl)-2-phenylethyl]carbamate (**3b**)

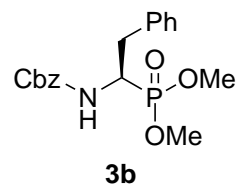

— 26.4

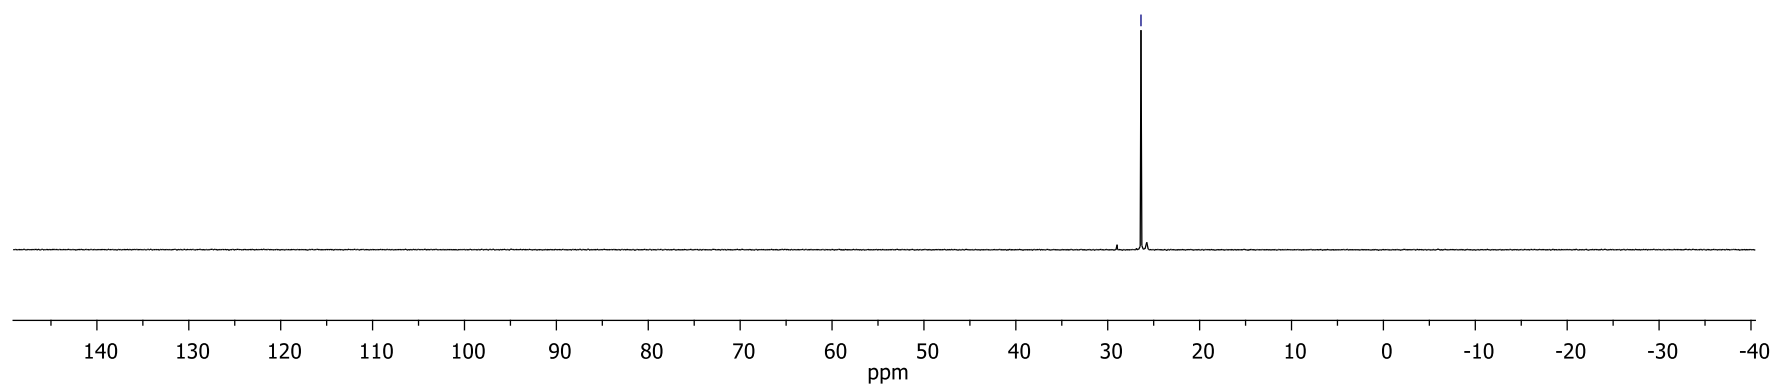

S19

<sup>1</sup>H NMR [400 MHz/CDCl<sub>3</sub>/TMS]: (*R*)-*tert*-Butyl N-[1-(dimethoxyphosphoryl)-2-phenylethyl]carbamate (**3c**)

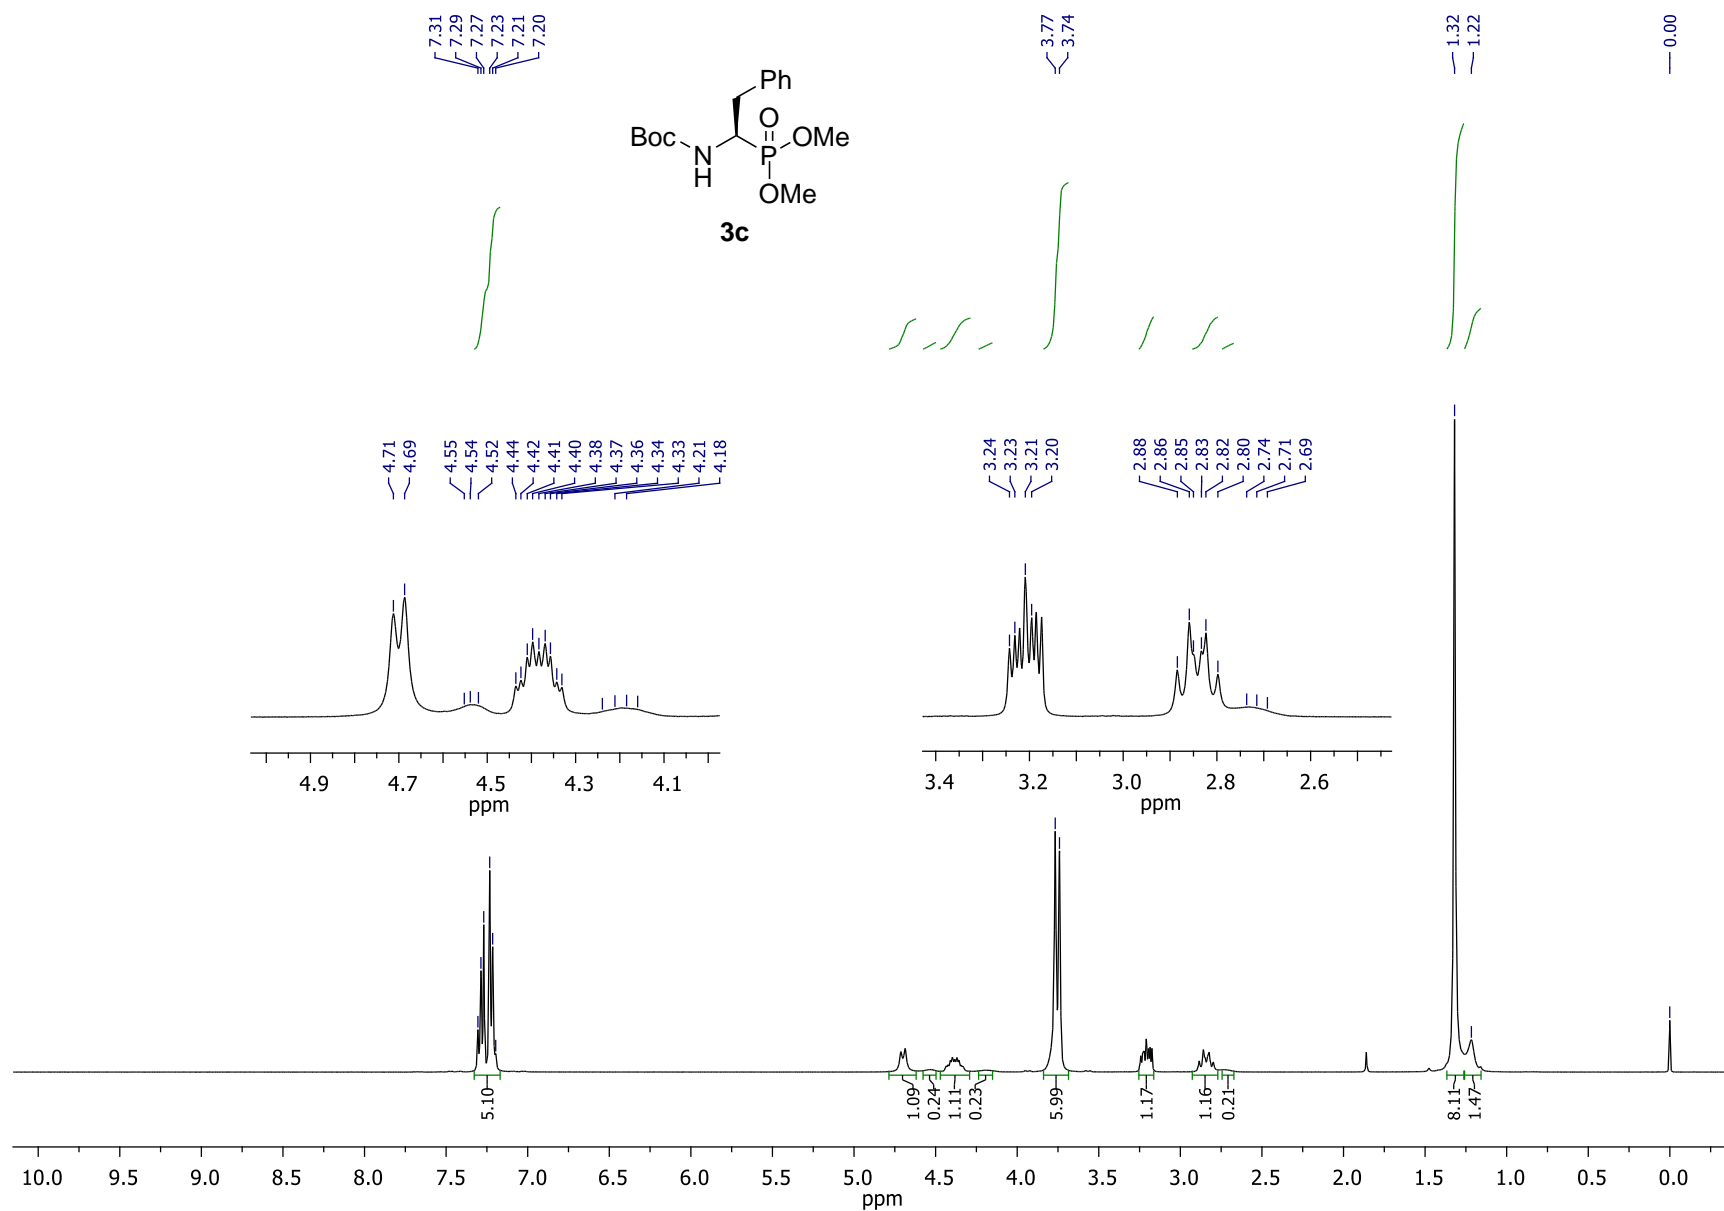

$^{13}\text{C}$  NMR [100 MHz/ $\text{CDCl}_3$ ]: (*R*)-*tert*-Butyl *N*-[1-(dimethoxyphosphoryl)-2-phenylethyl]carbamate (**3c**)

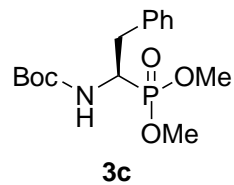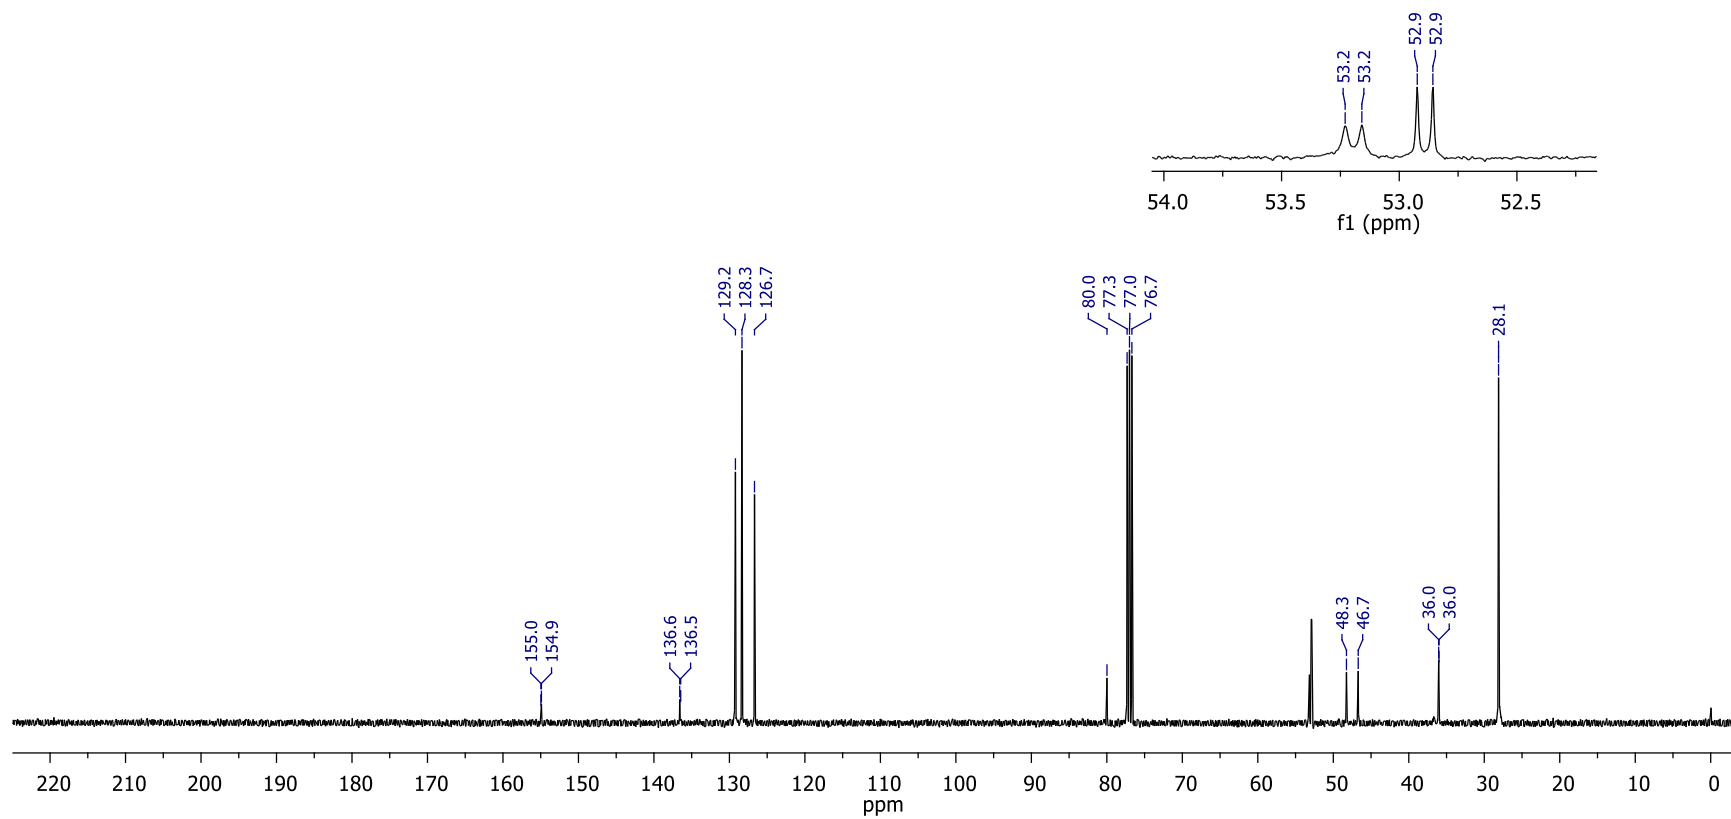

$^{31}\text{P}$  NMR [162 MHz/ $\text{CDCl}_3$ ]: (*R*)-*tert*-Butyl *N*-[1-(dimethoxyphosphoryl)-2-phenylethyl]carbamate (**3c**)

— 32.1

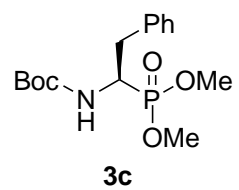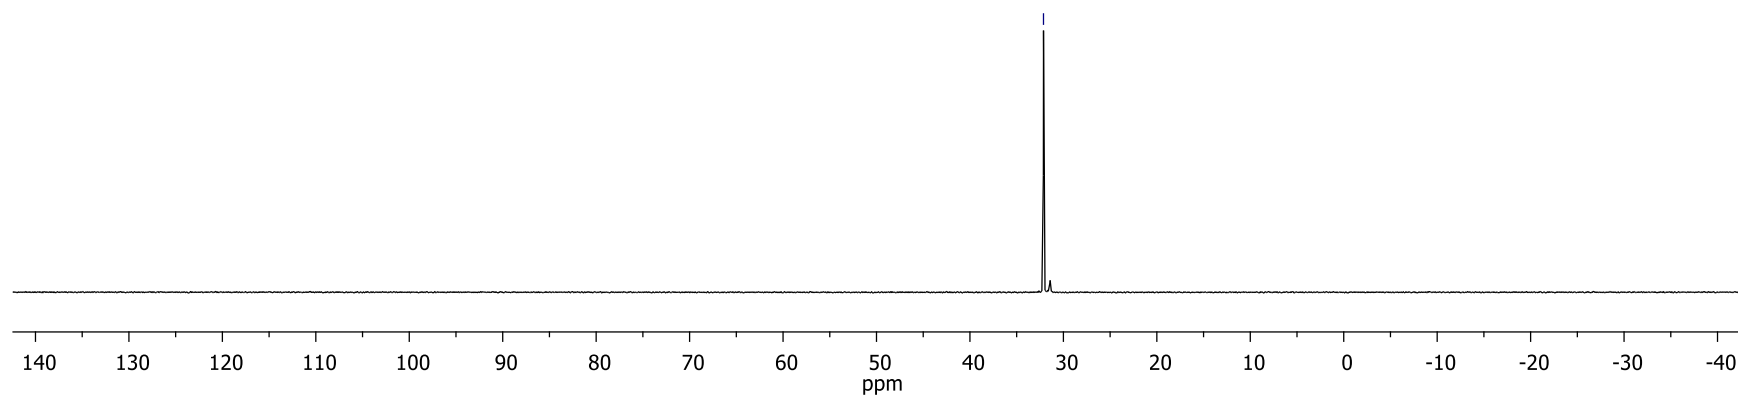

S22

<sup>1</sup>H NMR [400 MHz/CDCl<sub>3</sub>/TMS]: (*R*)-Benzyl *N*-[1-(dimethoxyphosphoryl)-2-methylpropyl]carbamate (**3d**)

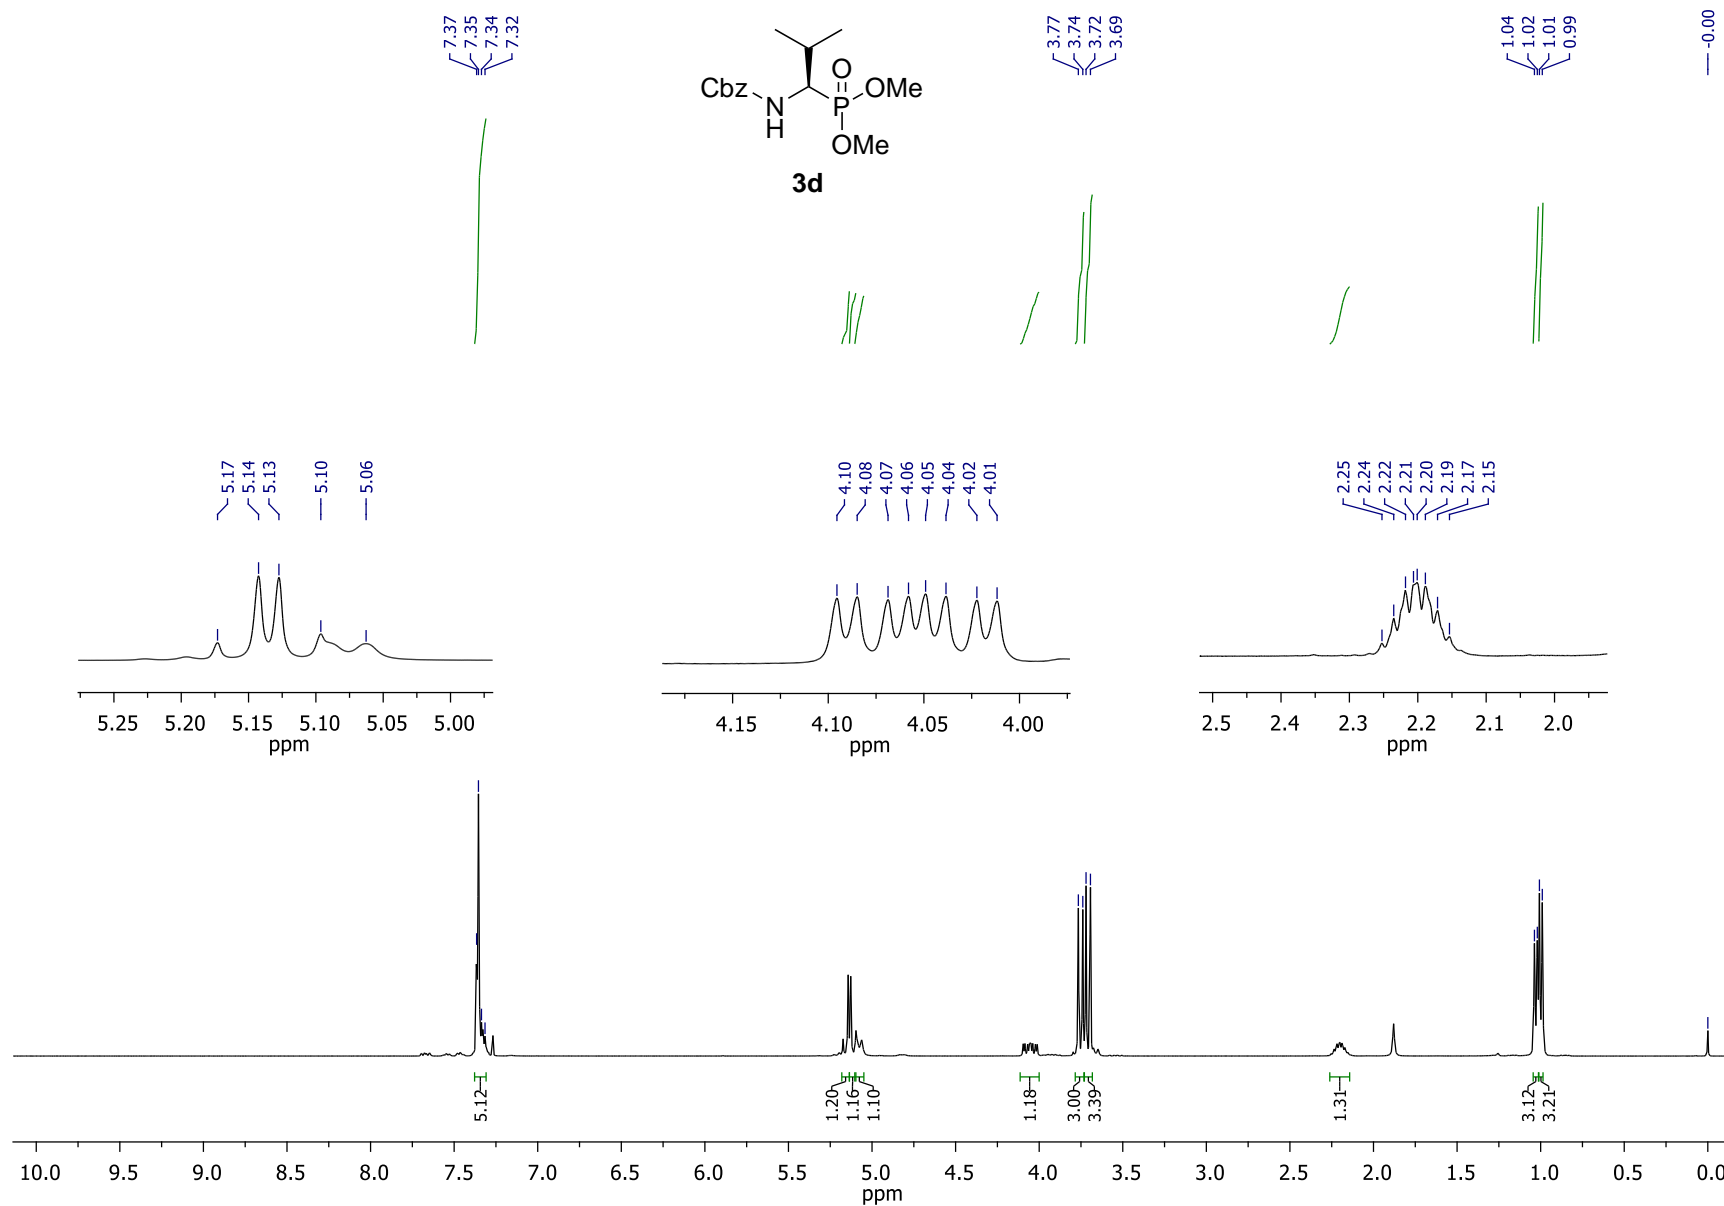

<sup>13</sup>C NMR [100 MHz/CDCl<sub>3</sub>] (*R*)-Benzyl *N*-[1-(dimethoxyphosphoryl)-2-methylpropyl]carbamate (**3d**)

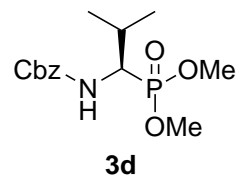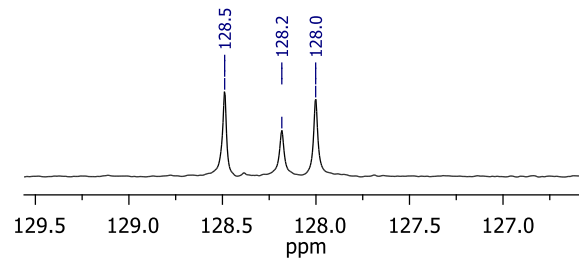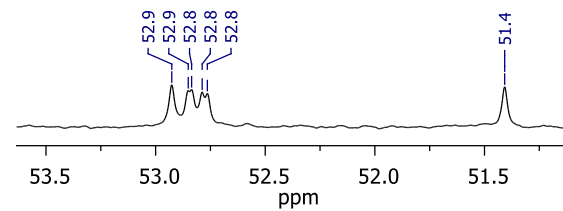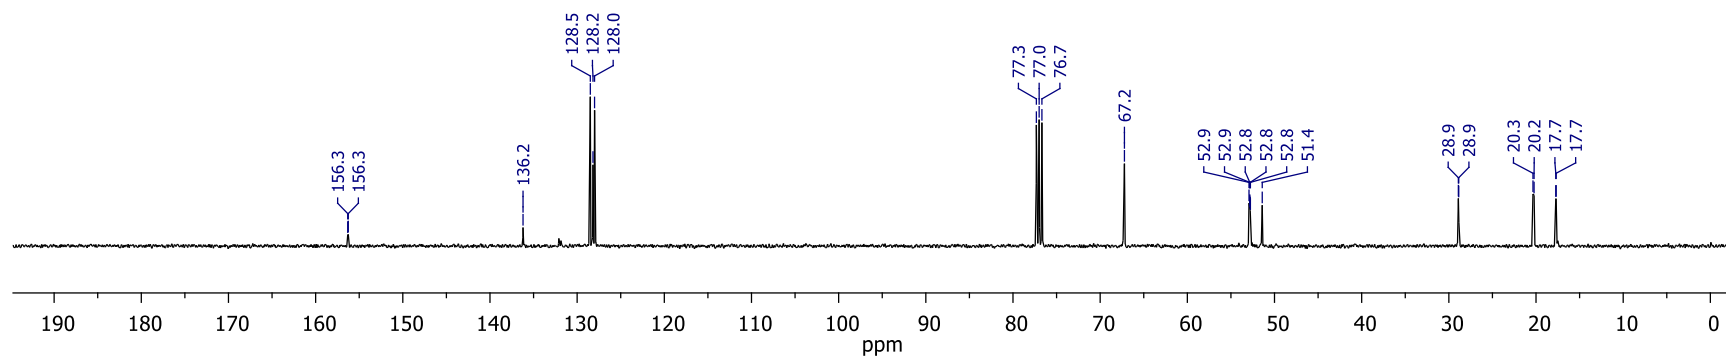



<sup>31</sup>P NMR [162 MHz/CDCl<sub>3</sub>]: (*R*)-Benzyl *N*-[1-(dimethoxyphosphoryl)-2-methylpropyl]carbamate (**3d**)

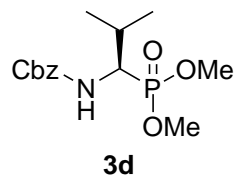

— 26.7

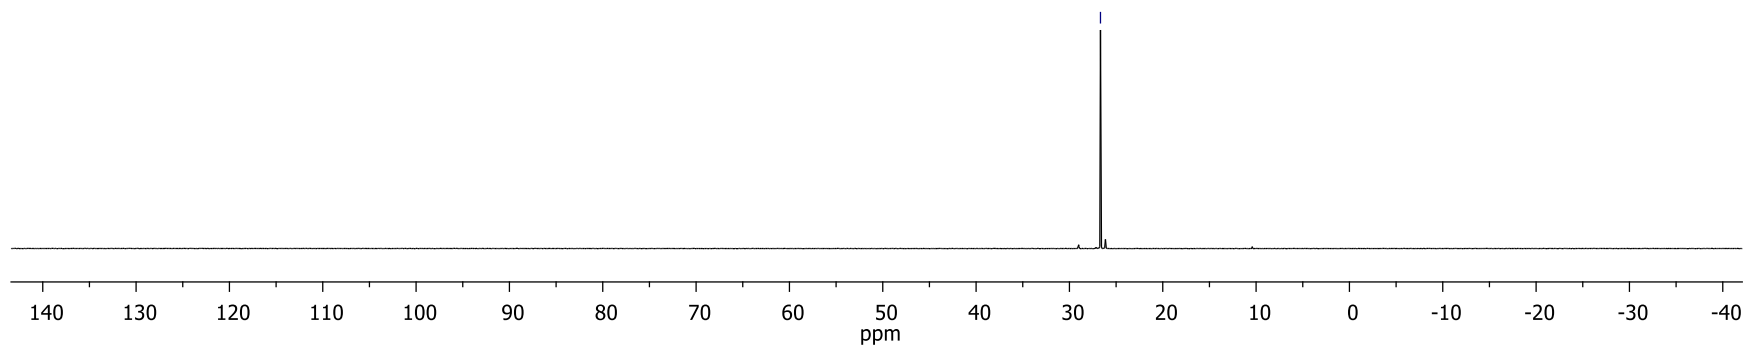

S25

<sup>1</sup>H NMR [400 MHz/CDCl<sub>3</sub>/TMS]: (*R*)-*tert*-Butyl *N*-[1-(dimethoxyphosphoryl)-2-methylpropyl]carbamate (**3e**)

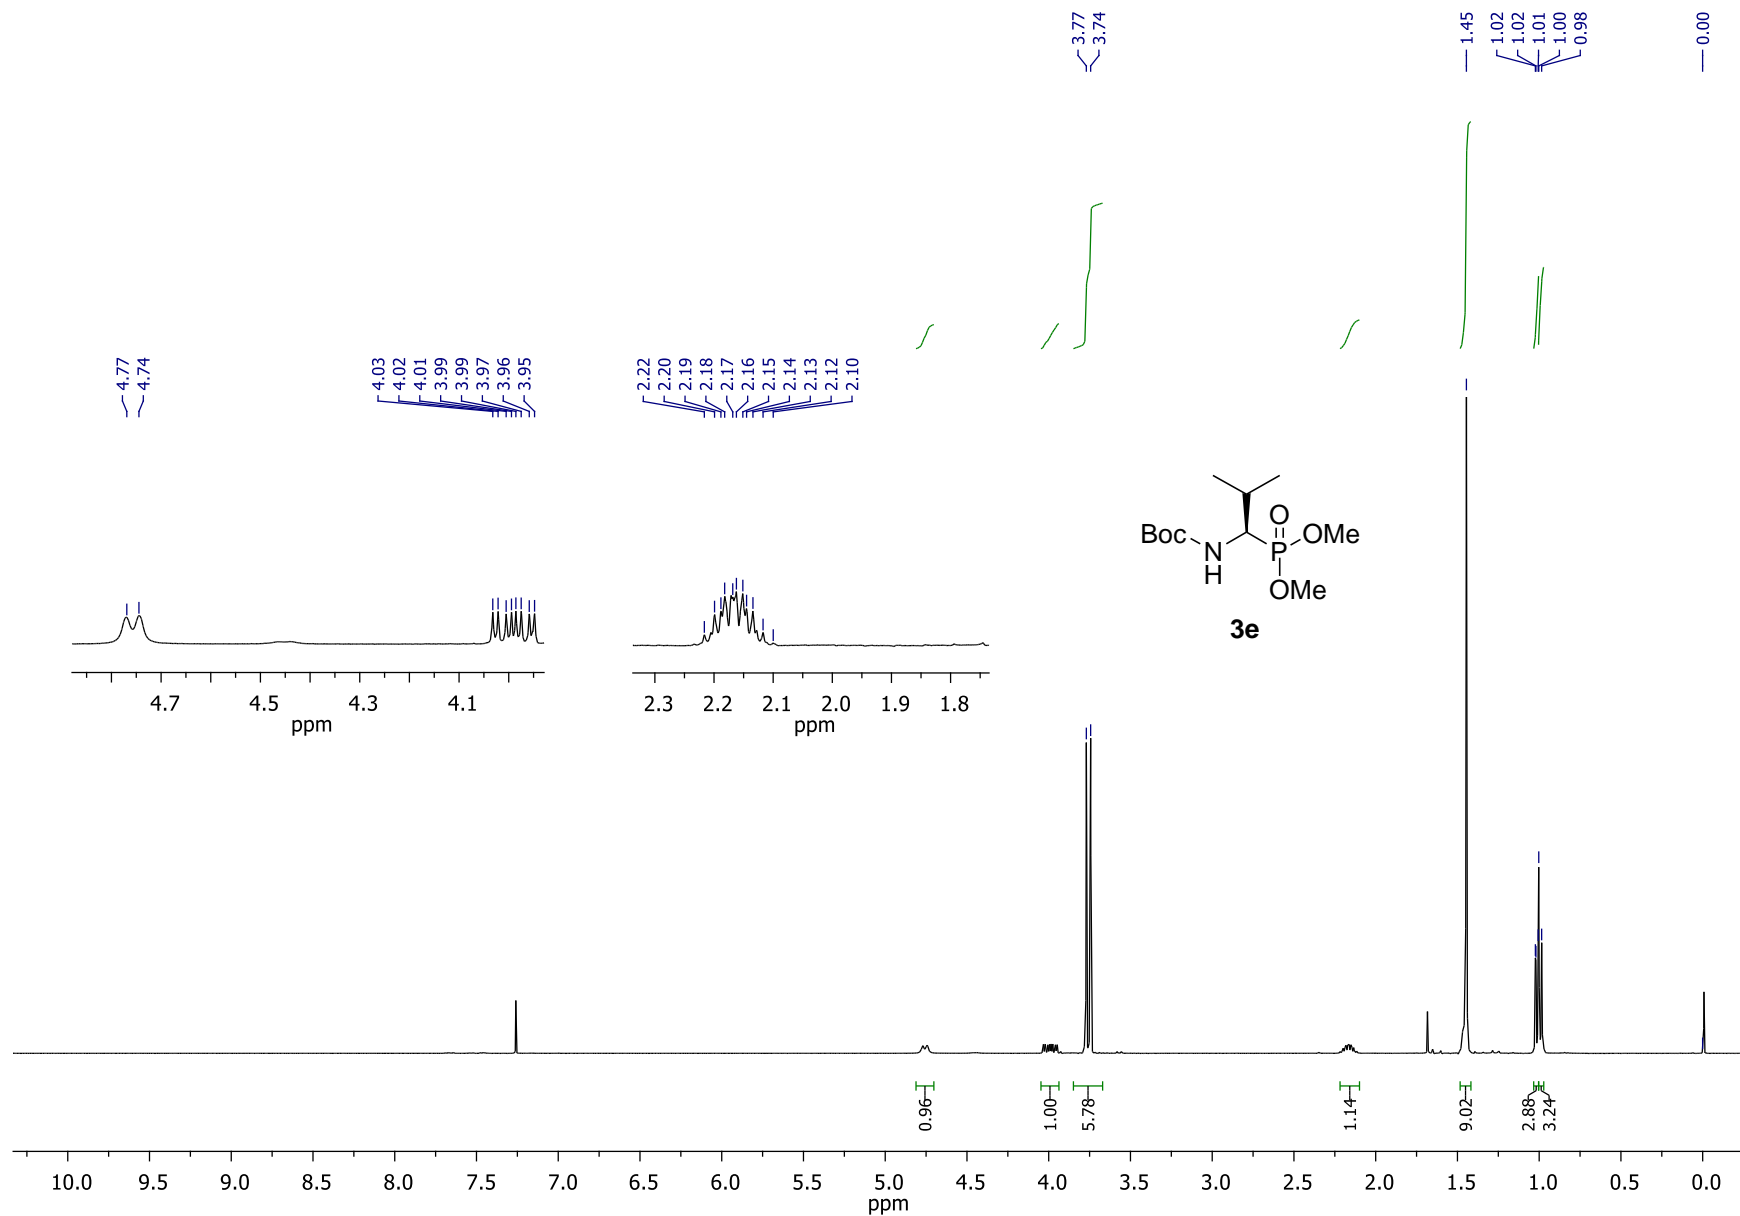

$^{13}\text{C}$  NMR [100 MHz/ $\text{CDCl}_3$ ]: (*R*)-*tert*-Butyl *N*-[1-(dimethoxyphosphoryl)-2-methylpropyl]carbamate (**3e**)

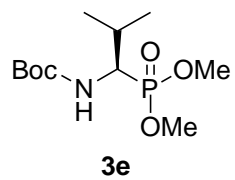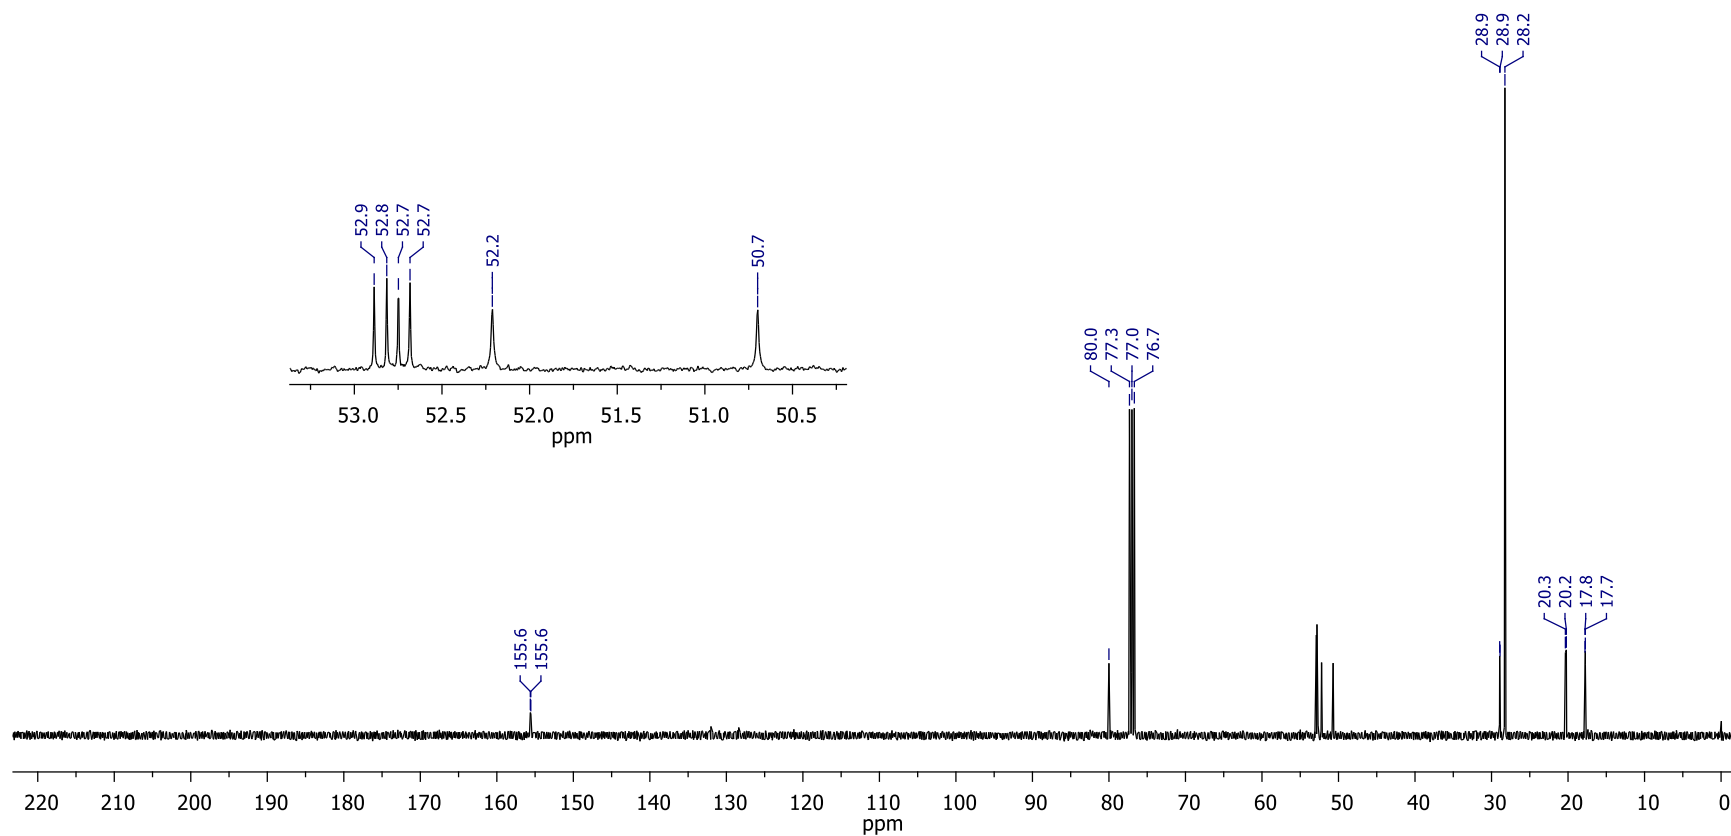

$^{31}\text{P}$  NMR [162 MHz/ $\text{CDCl}_3$ ]: (*R*)-*tert*-Butyl *N*-[1-(dimethoxyphosphoryl)-2-methylpropyl]carbamate (**3e**)

— 27.2

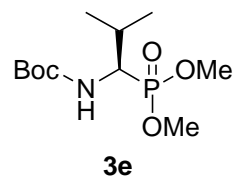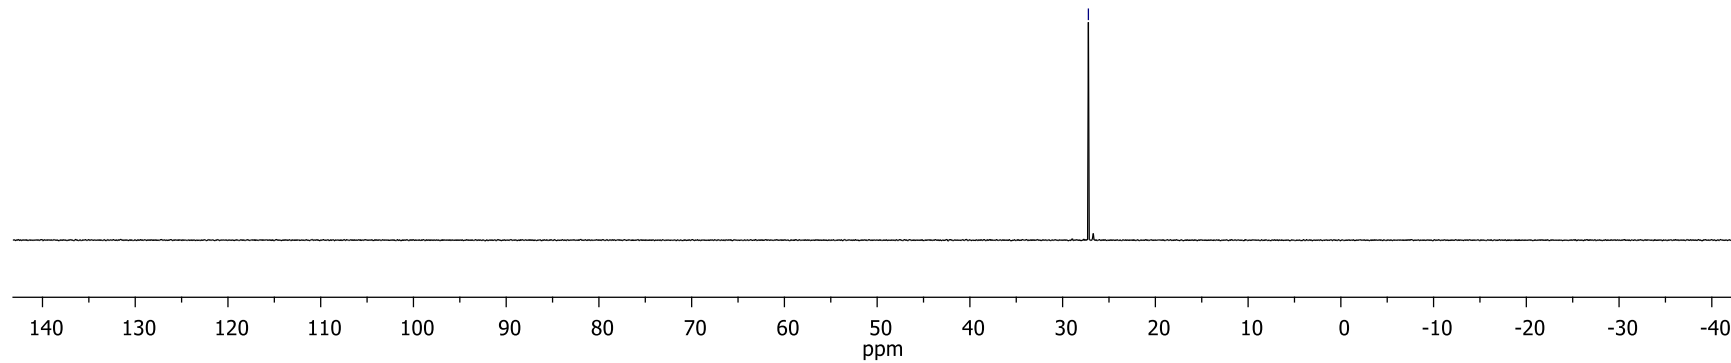

<sup>1</sup>H NMR [400 MHz/CDCl<sub>3</sub>/TMS]: (*R*)-Benzyl *N*-[1-(dimethoxyphosphoryl)-3-methylbutyl]carbamate (**3f**)

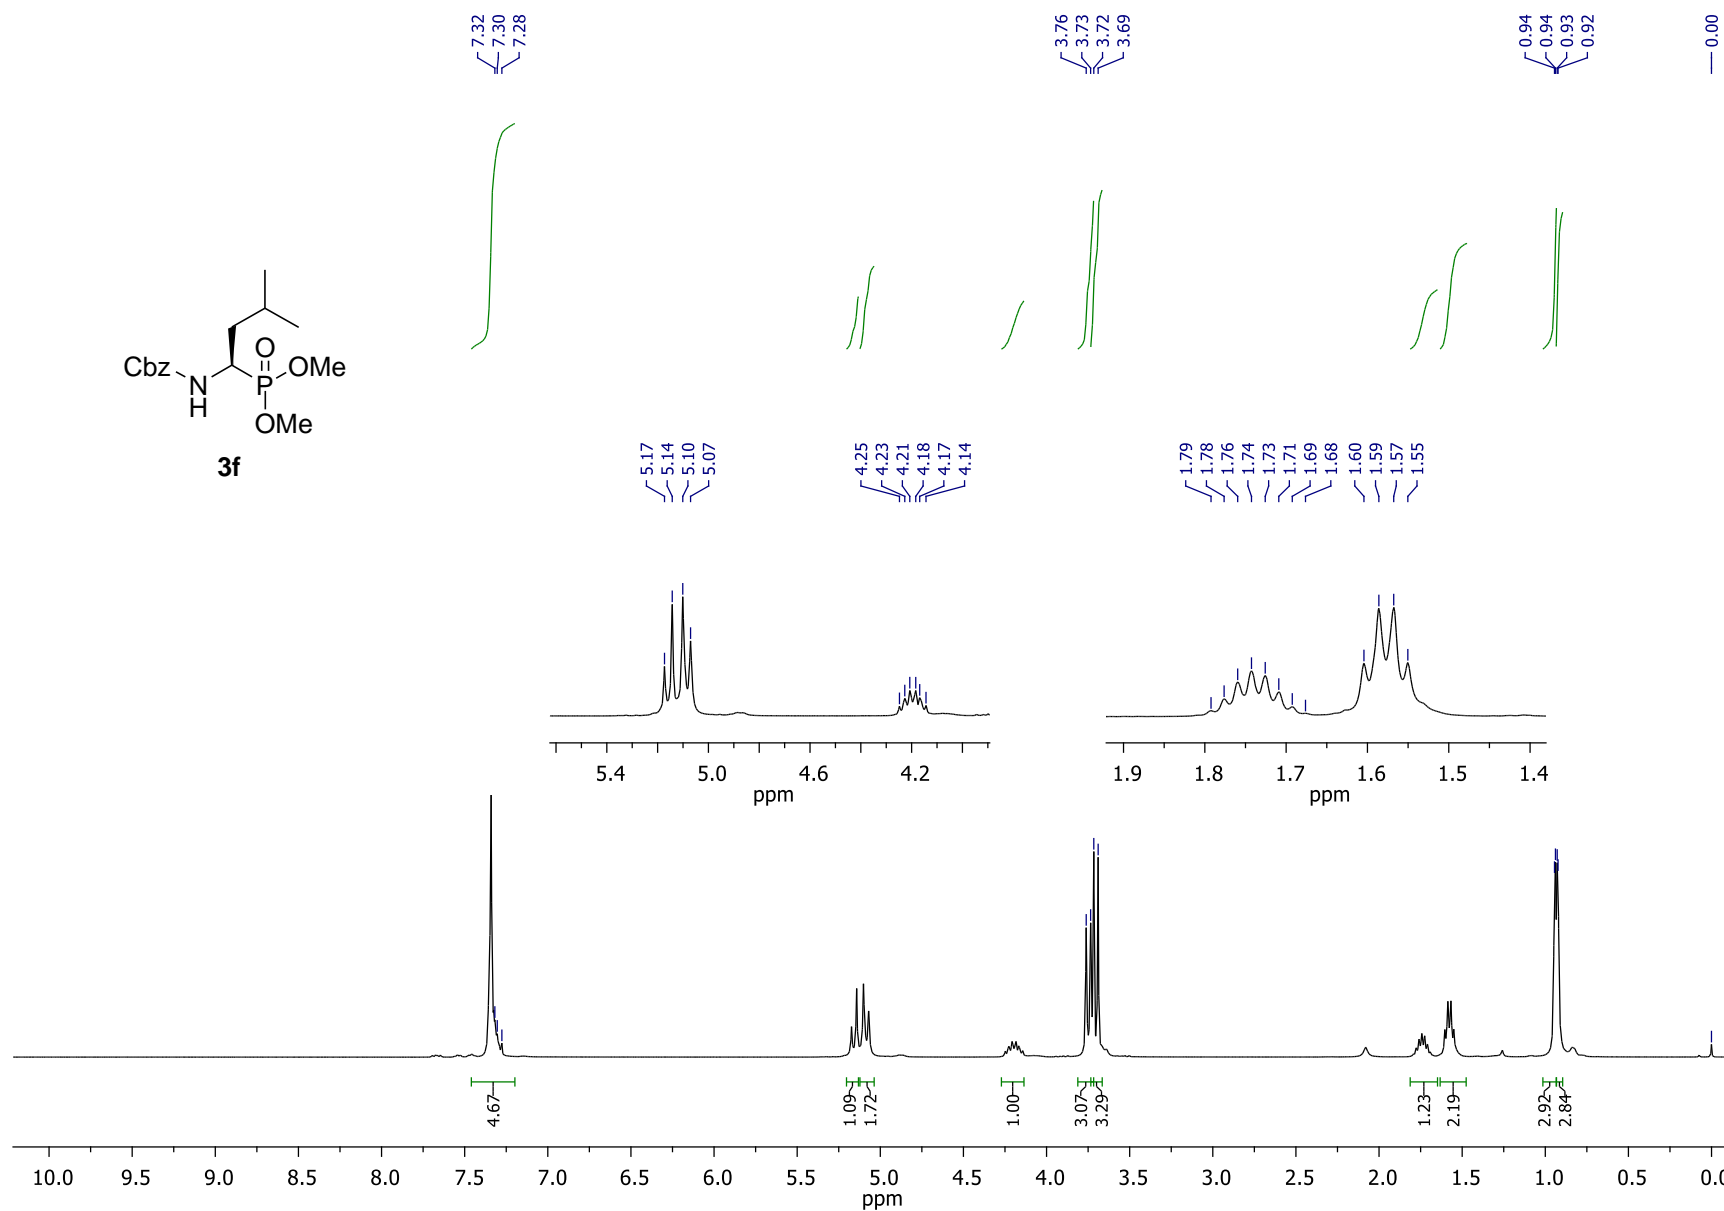

<sup>13</sup>C NMR [100 MHz/CDCl<sub>3</sub>]: (*R*)-Benzyl *N*-[1-(dimethoxyphosphoryl)-3-methylbutyl]carbamate (**3f**)

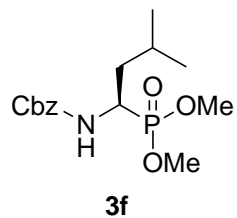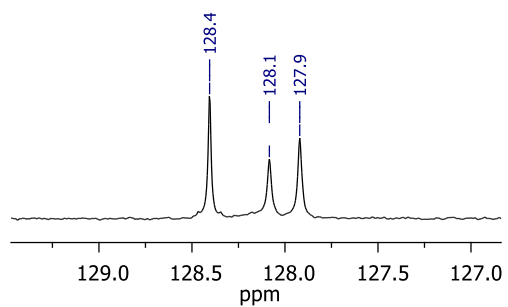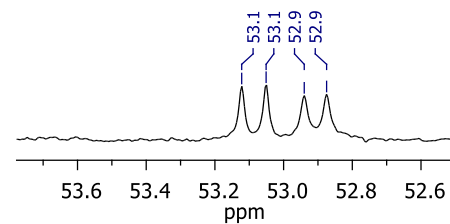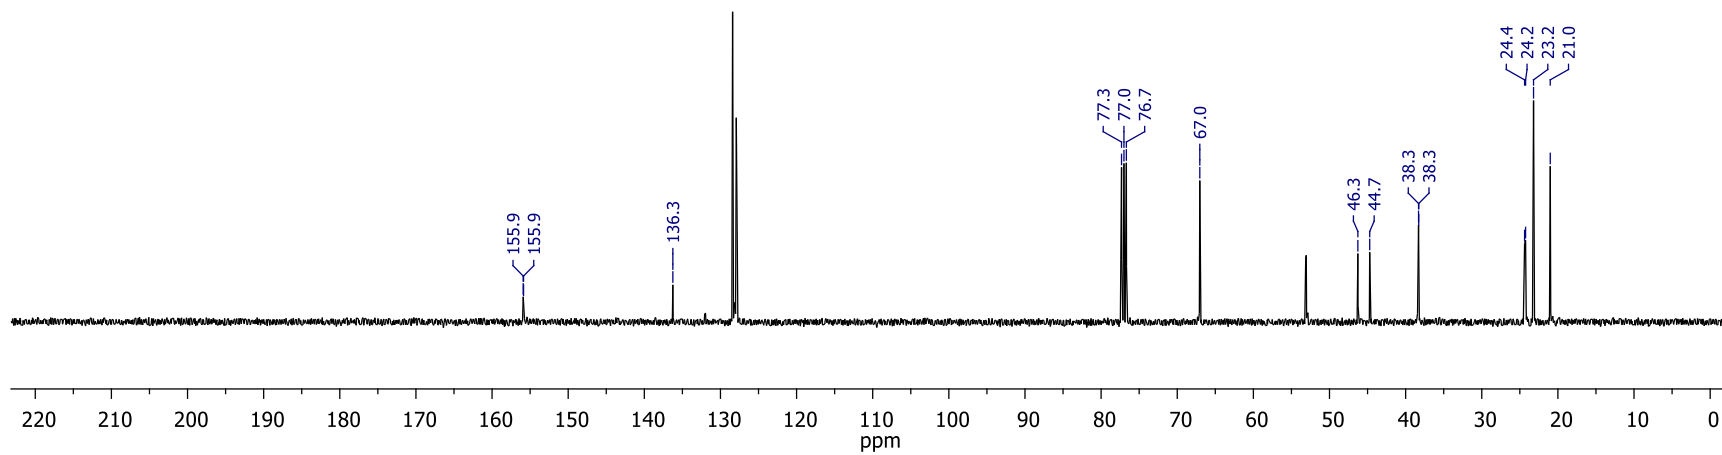

$^{31}\text{P}$  NMR [162 MHz/ $\text{CDCl}_3$ ]: (*R*)-Benzyl *N*-[1-(dimethoxyphosphoryl)-3-methylbutyl]carbamate (**3f**)

— 29.0

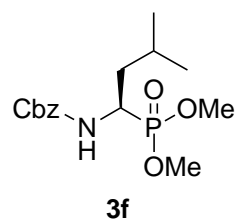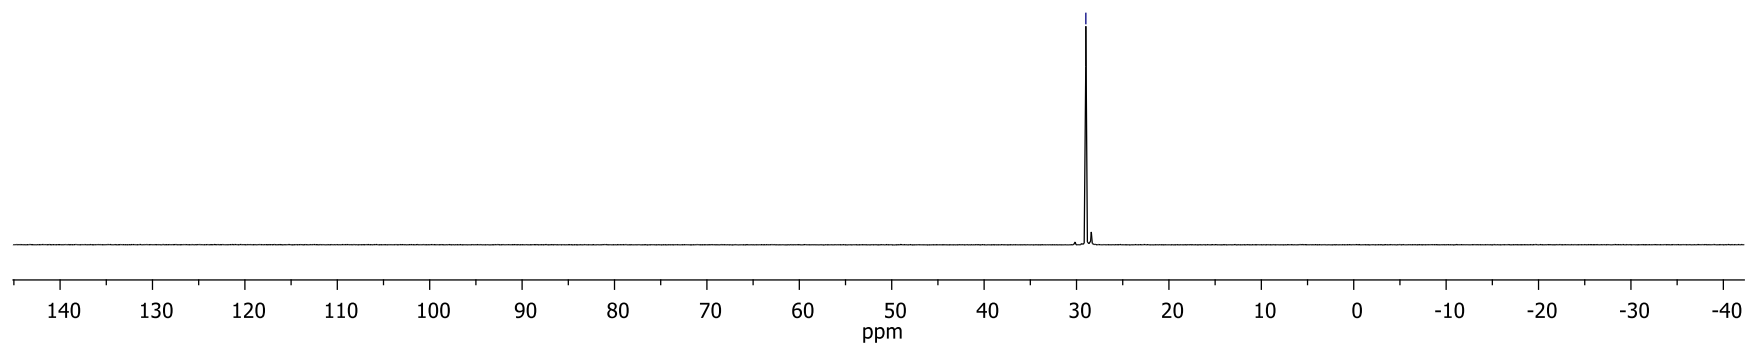

S31

<sup>1</sup>H NMR [400 MHz/CDCl<sub>3</sub>/TMS]: (*R*)-Benzyl *N*-[1-(dimethoxyphosphoryl)butyl]carbamate (**3g**)

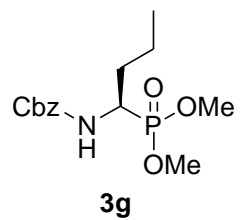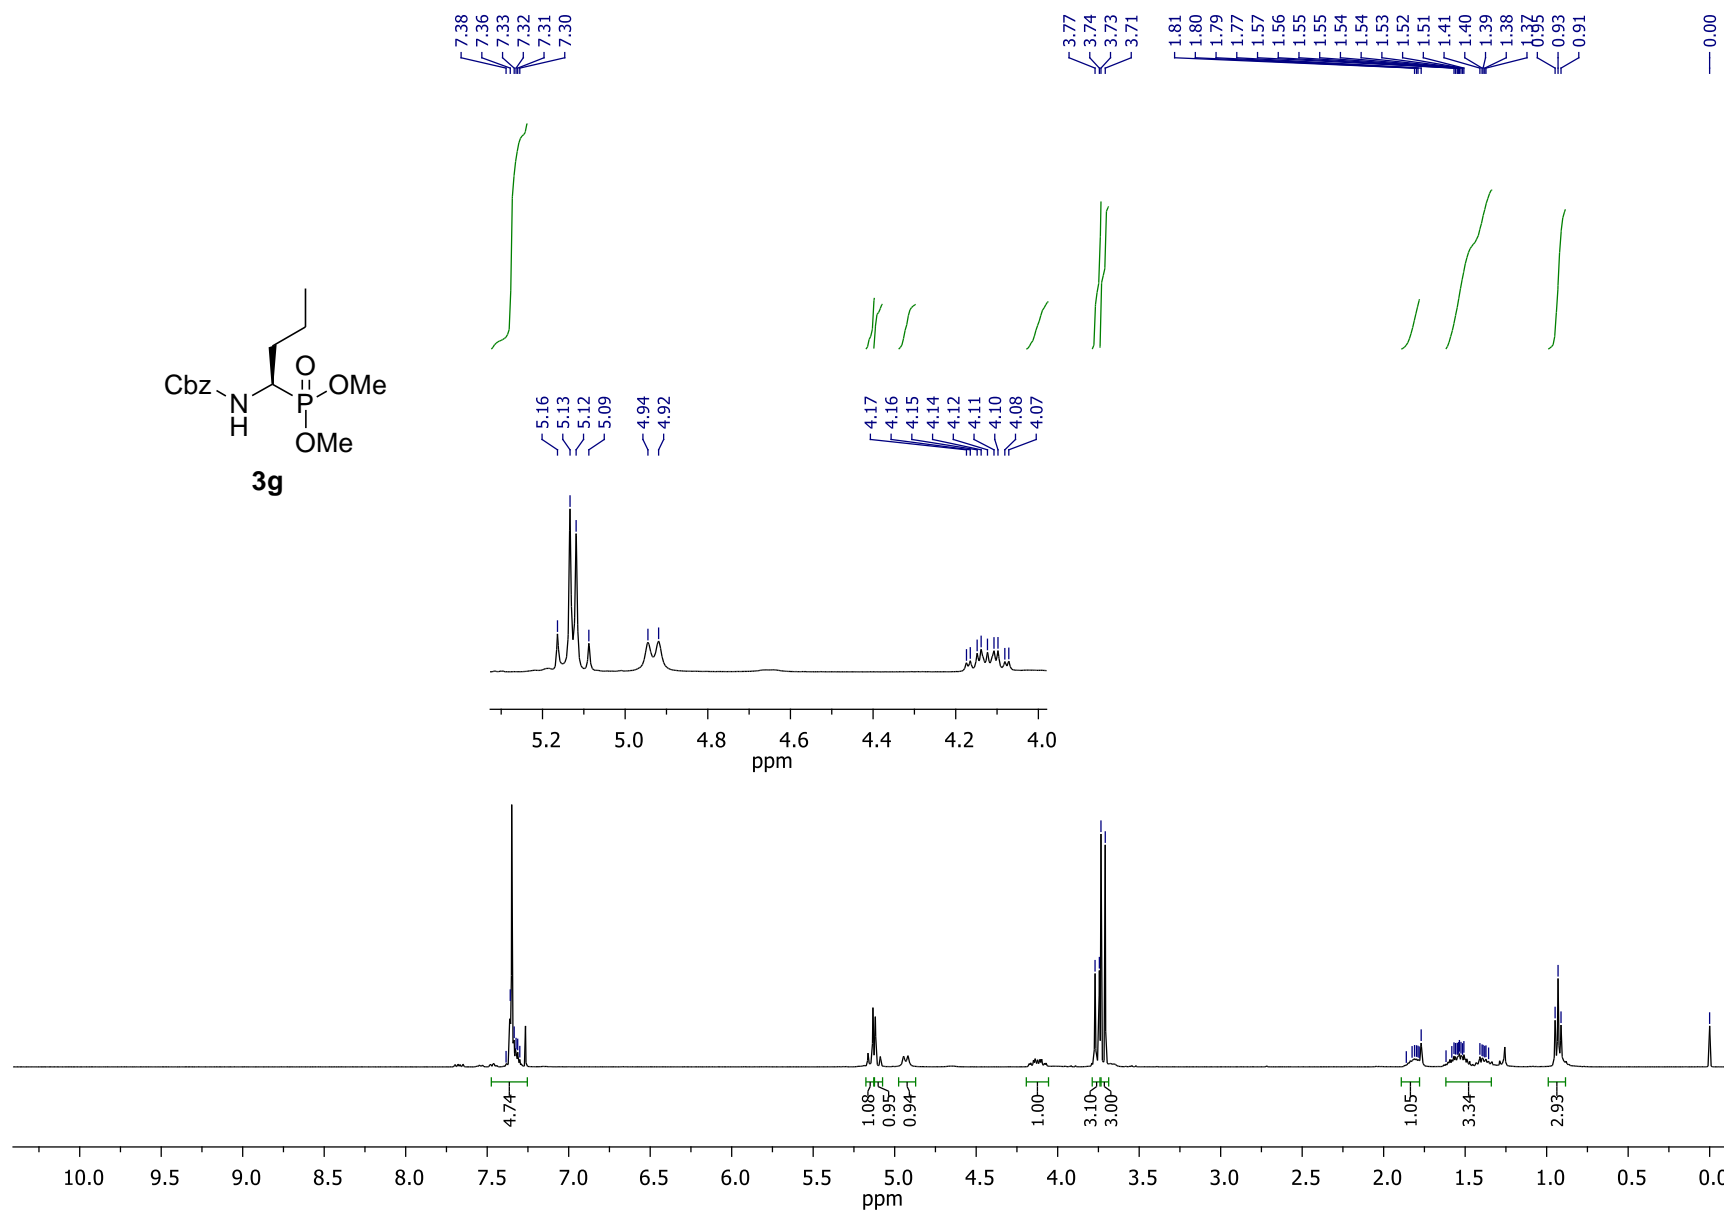



$^{13}\text{C}$  NMR [100 MHz/ $\text{CDCl}_3$ ]: (*R*)-Benzyl *N*-[1-(dimethoxyphosphoryl)butyl]carbamate (**3g**)

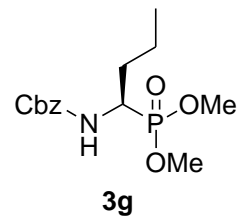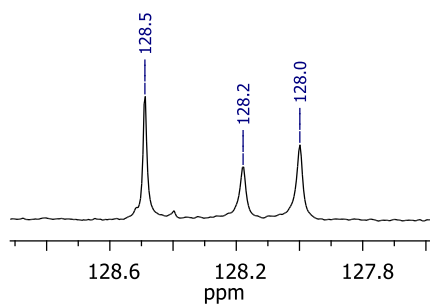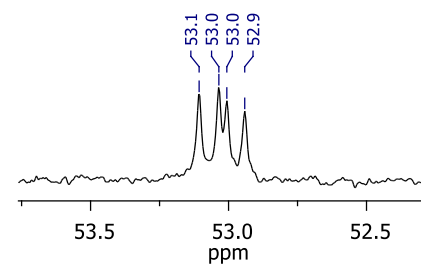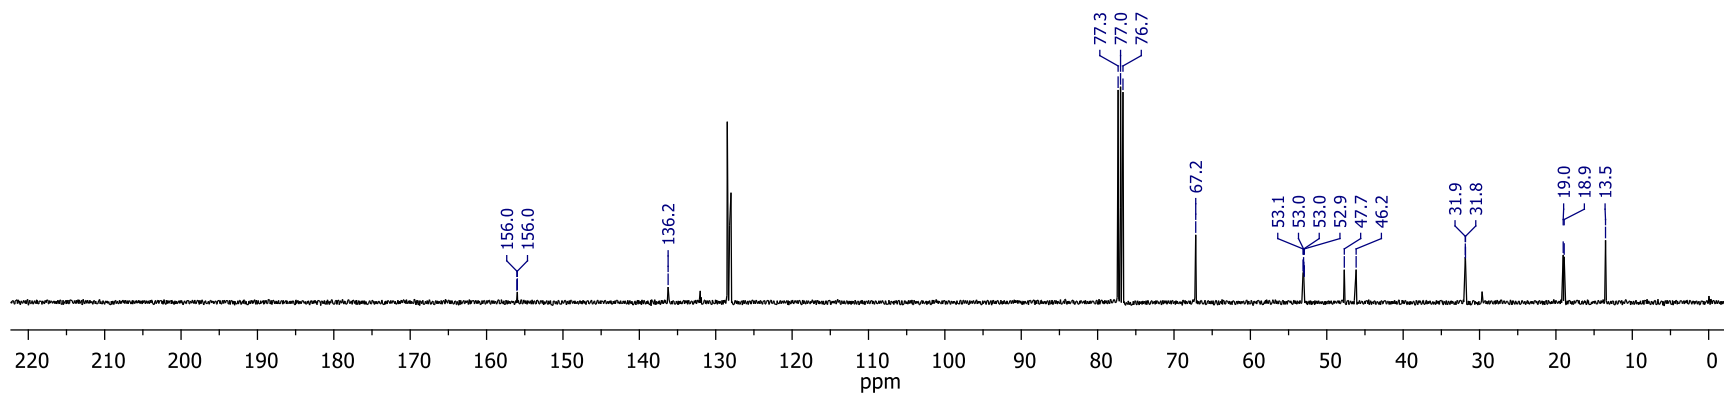

<sup>31</sup>P NMR [162 MHz/CDCl<sub>3</sub>]: (*R*)-Benzyl *N*-[1-(dimethoxyphosphoryl)butyl]carbamate (**3g**)

— 27.5

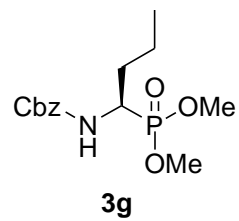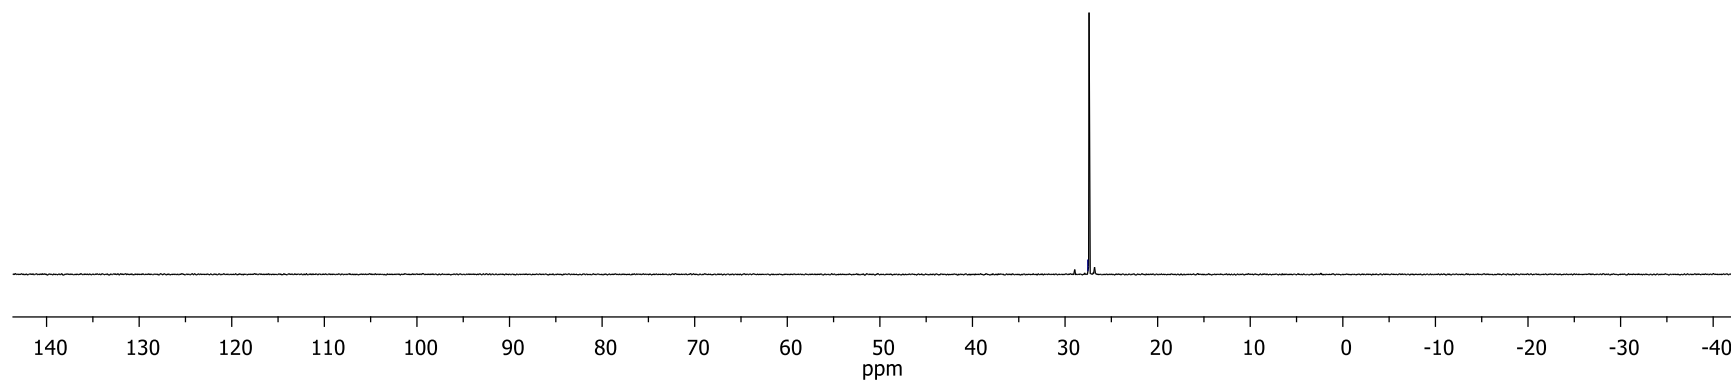

S34

HRMS: (*R*)-Benzyl *N*-[1-(dimethoxyphosphoryl)butyl]carbamate (**3g**)

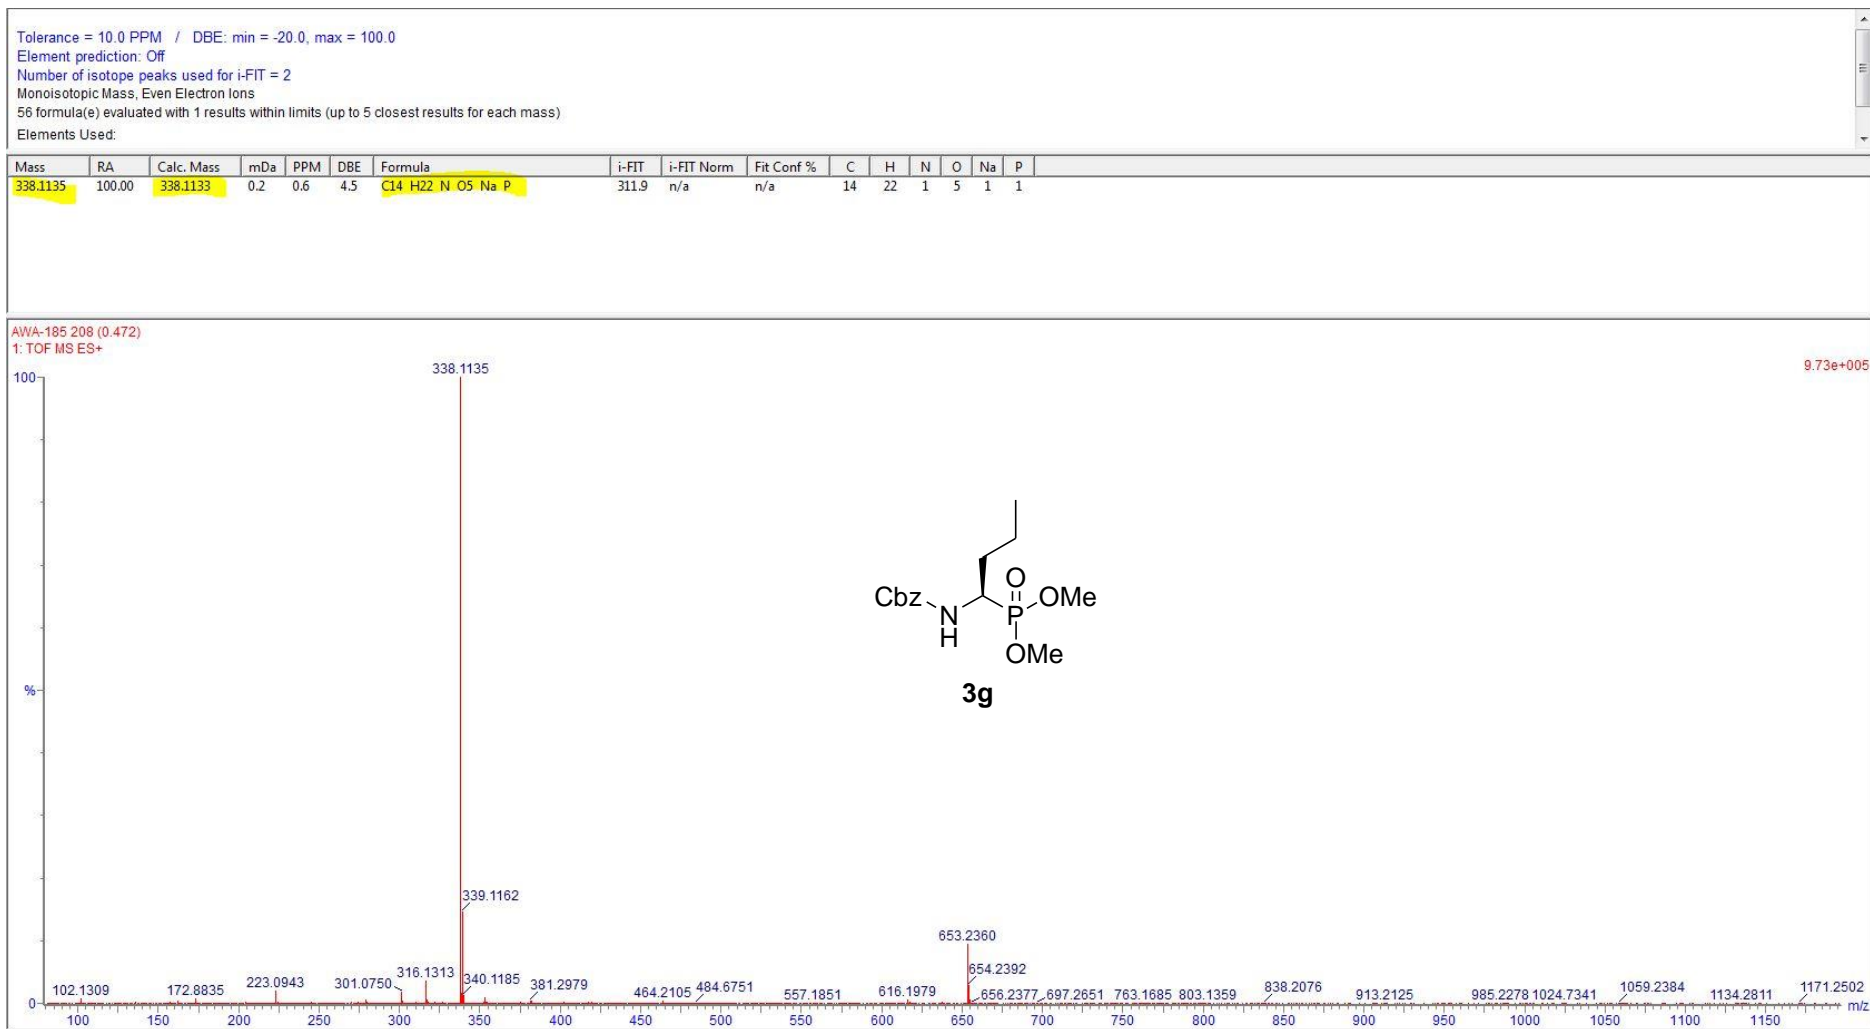

<sup>1</sup>H NMR [400 MHz/CDCl<sub>3</sub>/TMS]: (*R*)-Benzyl *N*-[1-(dimethoxyphosphoryl)pentyl]carbamate (**3h**)

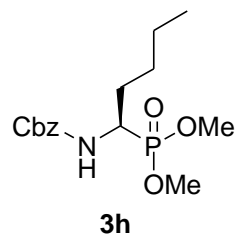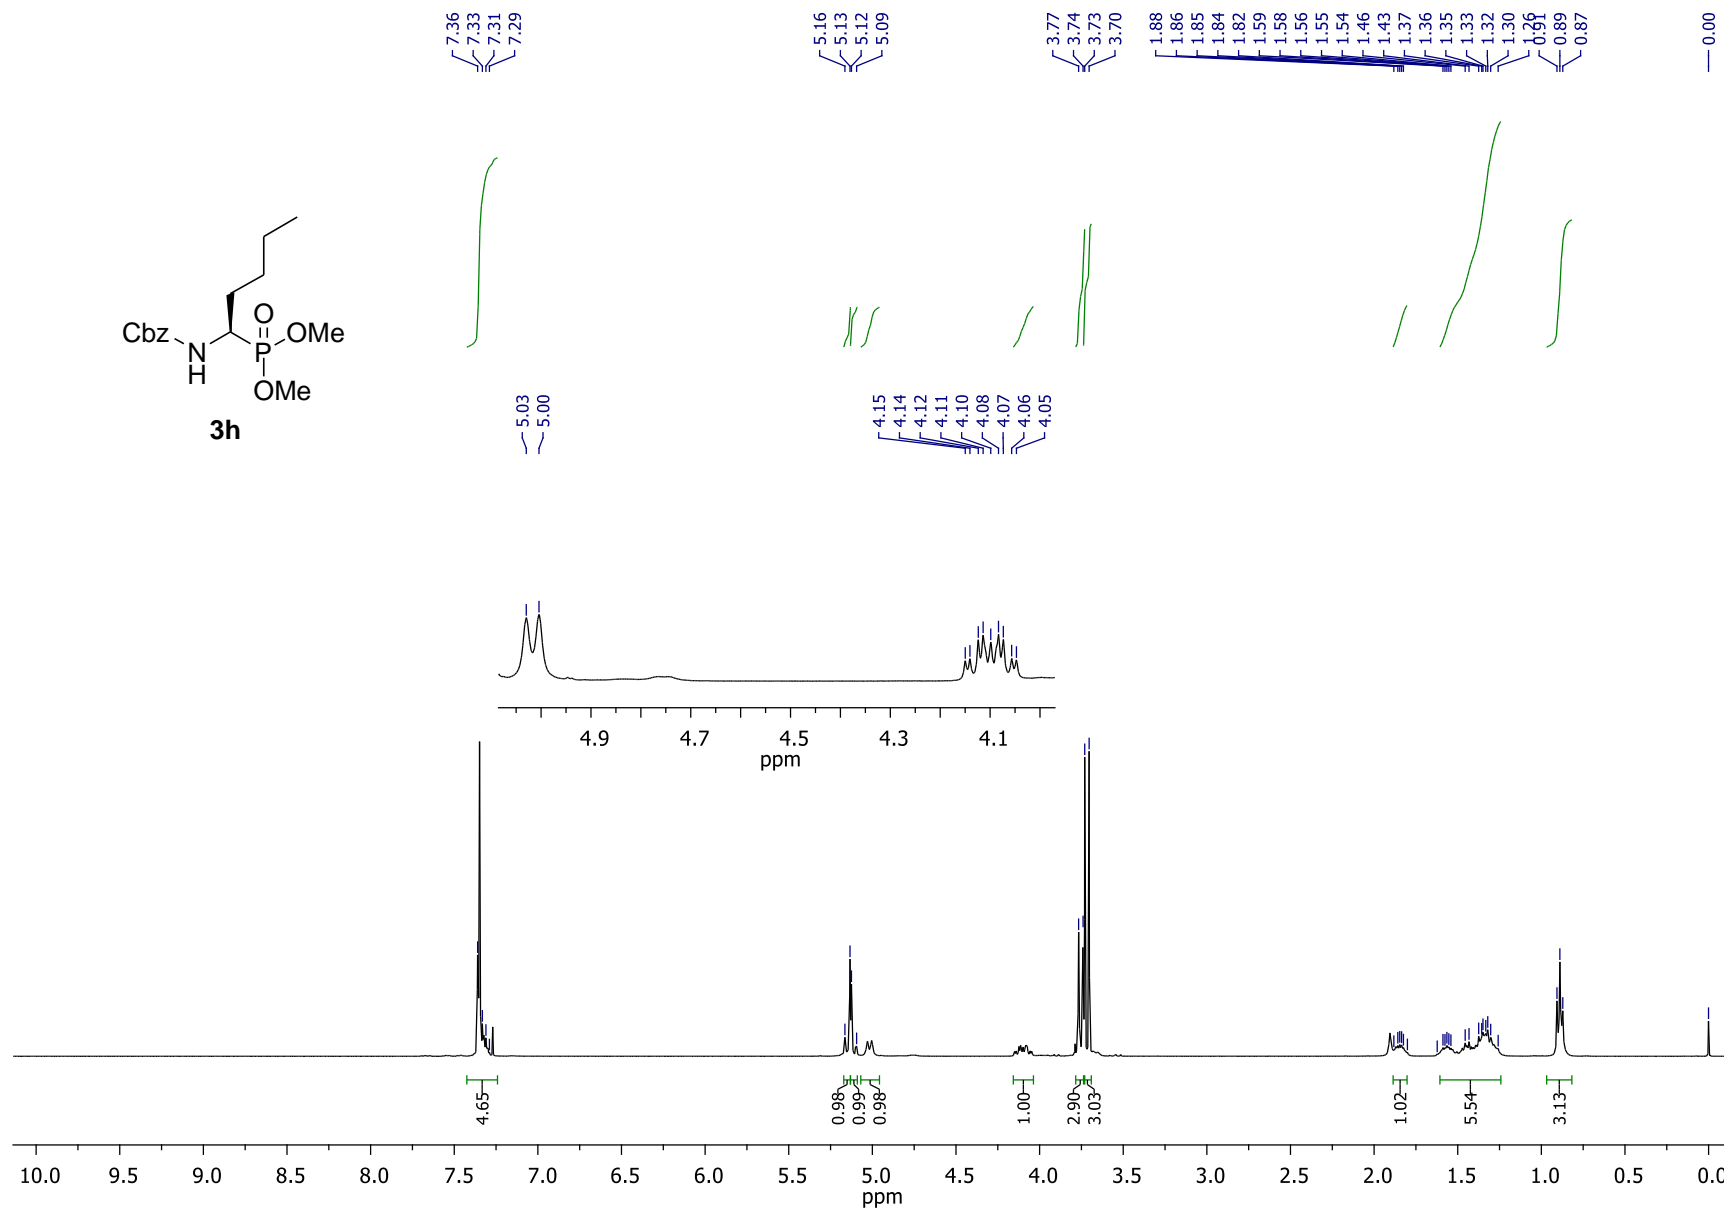

<sup>13</sup>C NMR [100 MHz/CDCl<sub>3</sub>]: (*R*)-Benzyl *N*-[1-(dimethoxyphosphoryl)pentyl]carbamate (**3h**)

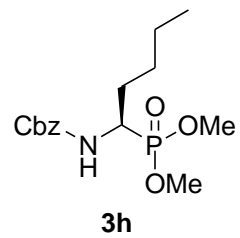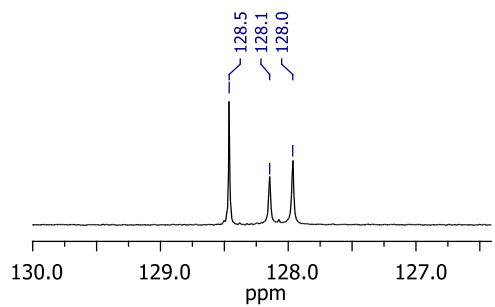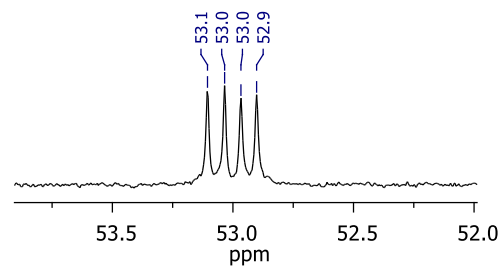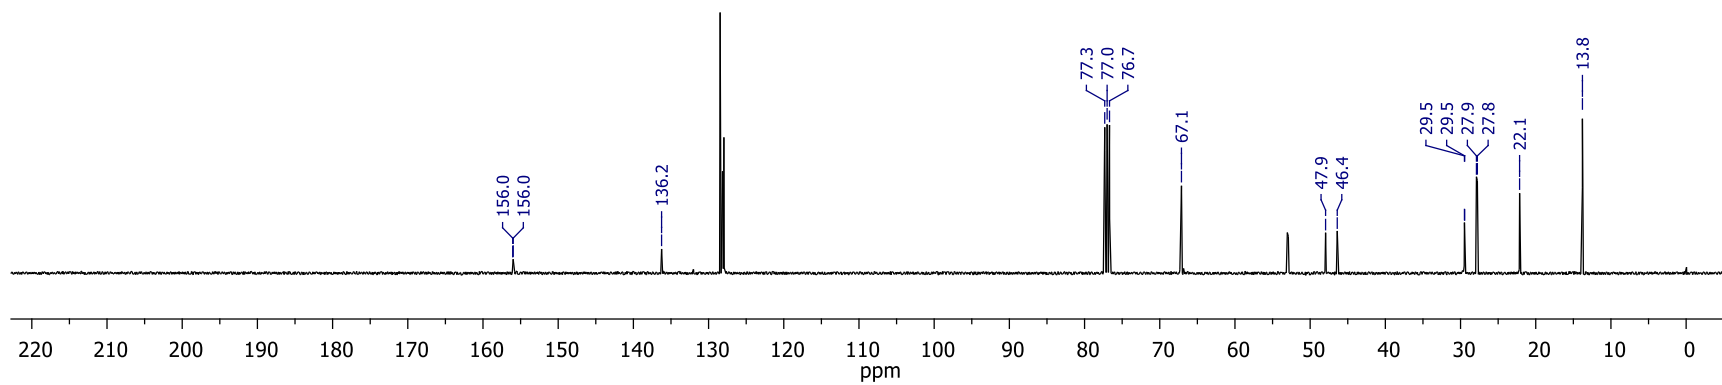

$^{31}\text{P}$  NMR [162 MHz/ $\text{CDCl}_3$ ]: (*R*)-Benzyl *N*-[1-(dimethoxyphosphoryl)pentyl]carbamate (**3h**)

— 27.4

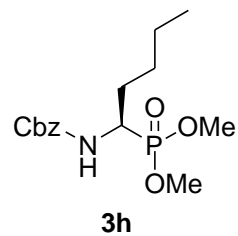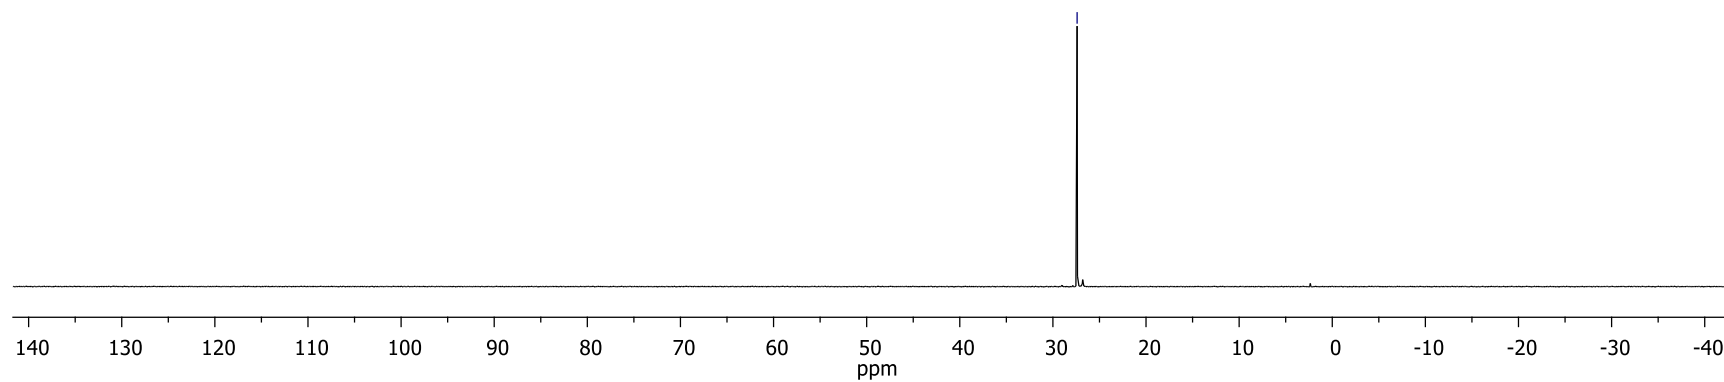

<sup>1</sup>H NMR [400 MHz/CDCl<sub>3</sub>/TMS]: (*R*)-Benzyl *N*-[cyclohexyl(dimethoxyphosphoryl)methyl]carbamate (**3i**)

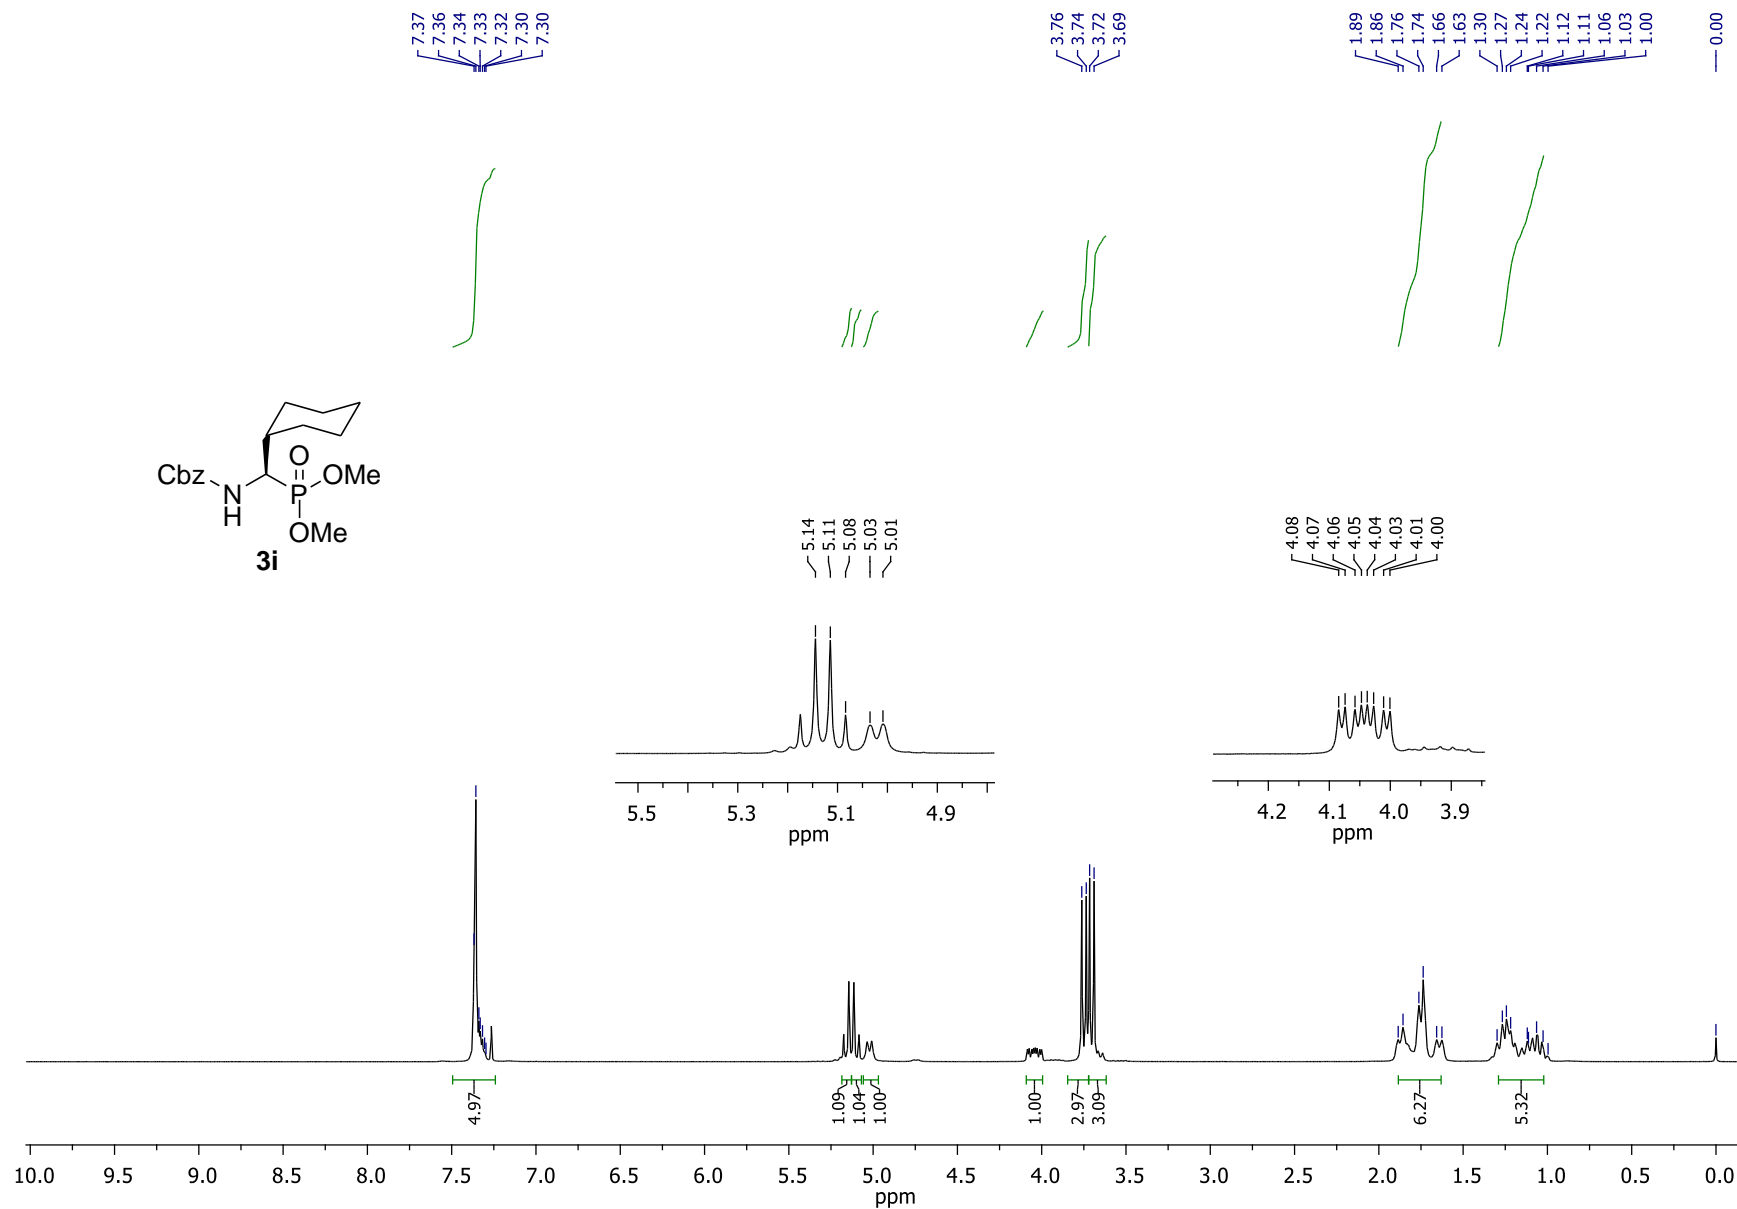

$^{13}\text{C}$  NMR [100 MHz/ $\text{CDCl}_3$ ]: (*R*)-Benzyl *N*-[cyclohexyl(dimethoxyphosphoryl)methyl]carbamate (**3i**)

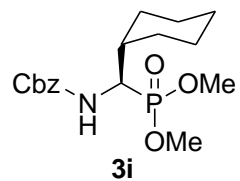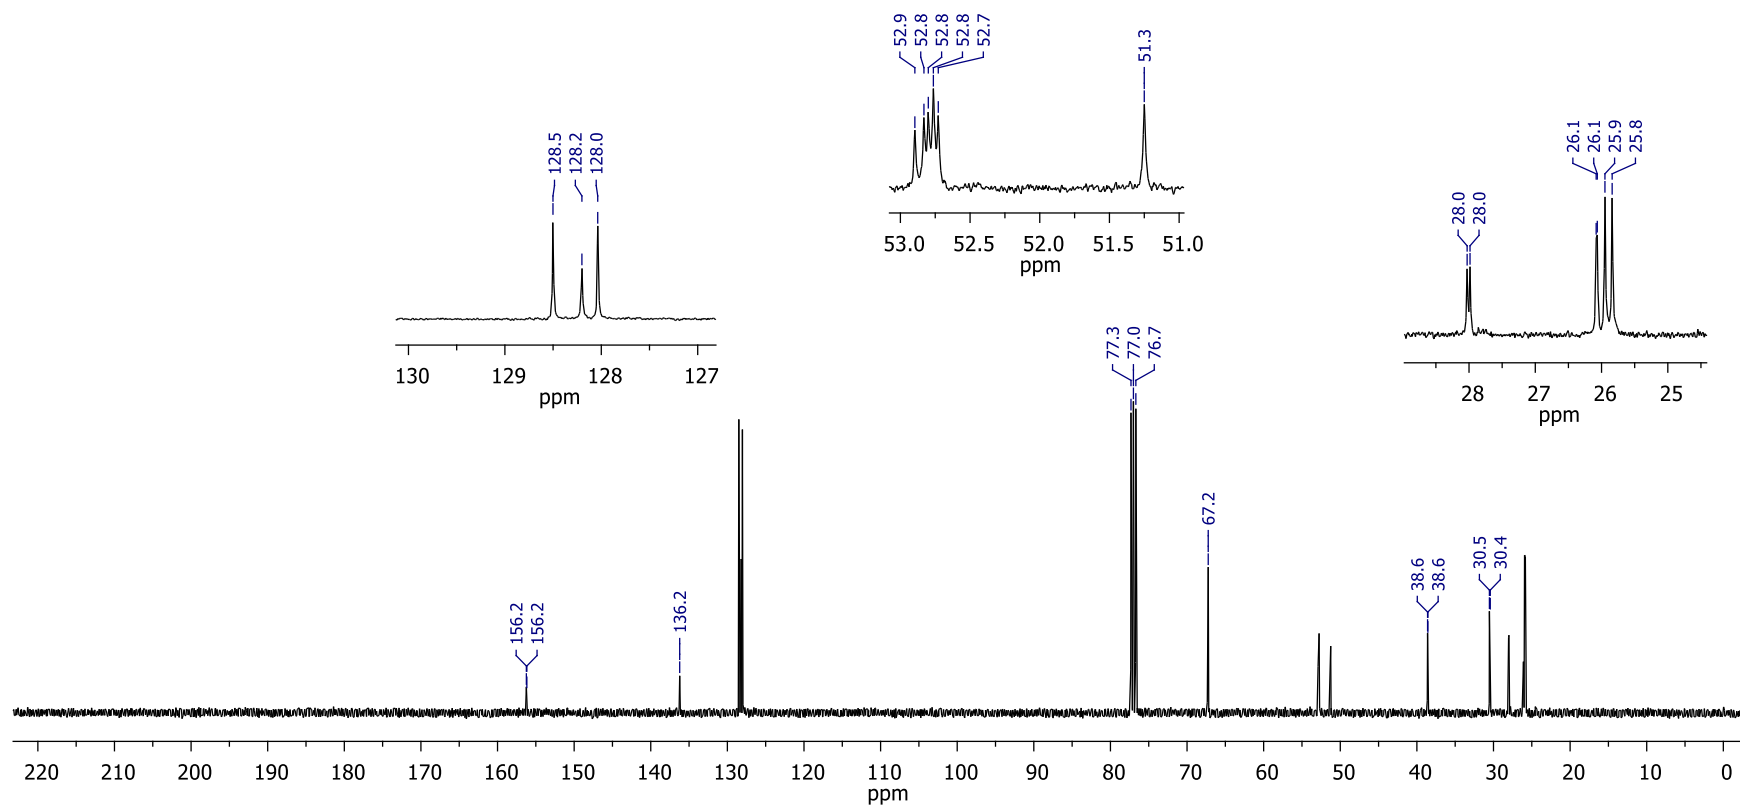



<sup>31</sup>P NMR [162 MHz/CDCl<sub>3</sub>]: (*R*)-Benzyl *N*-[cyclohexyl(dimethoxyphosphoryl)methyl]carbamate (**3i**)

— 26.7

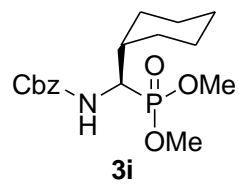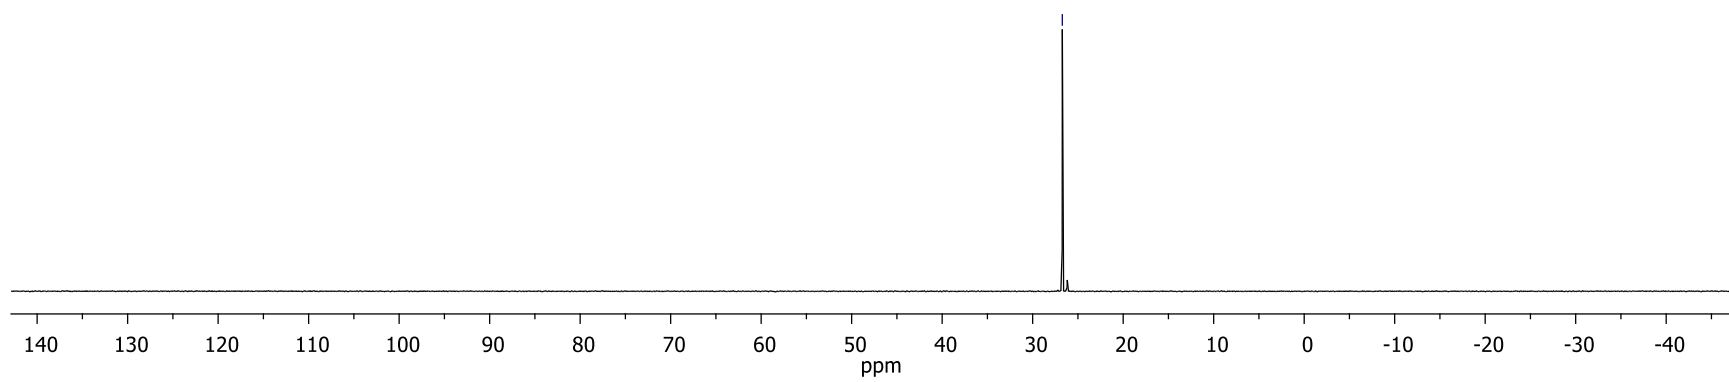

S41

<sup>1</sup>H NMR [400 MHz/CDCl<sub>3</sub>/TMS]: (*R*)-Benzyl *N*-[2-(*tert*-butoxy)-1-(dimethoxyphosphoryl)ethyl]carbamate (**3j**)

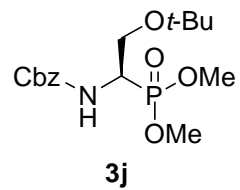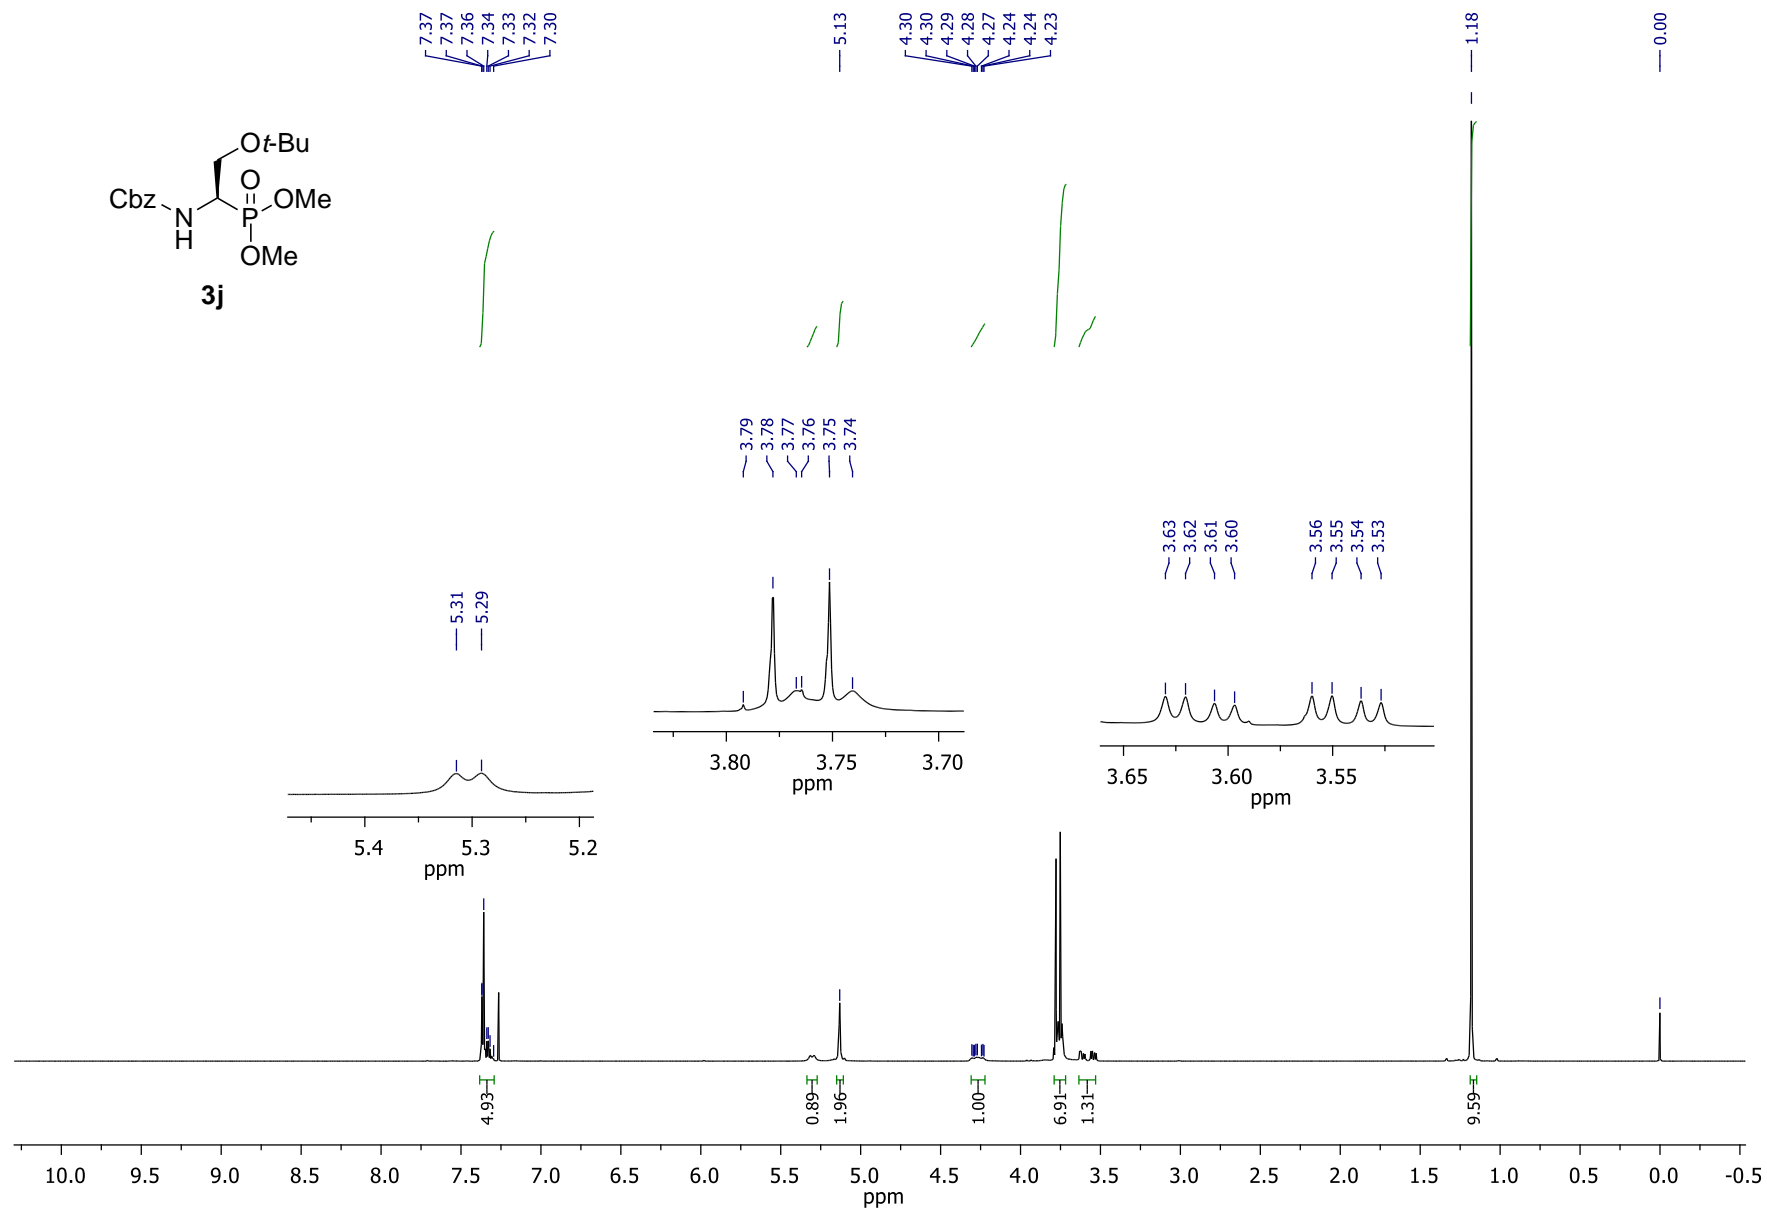

<sup>13</sup>C NMR [100 MHz/CDCl<sub>3</sub>]: (*R*)-Benzyl *N*-[2-(*tert*-butoxy)-1-(dimethoxyphosphoryl)ethyl]carbamate (**3j**)

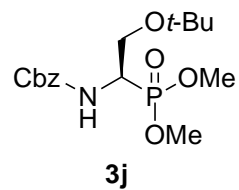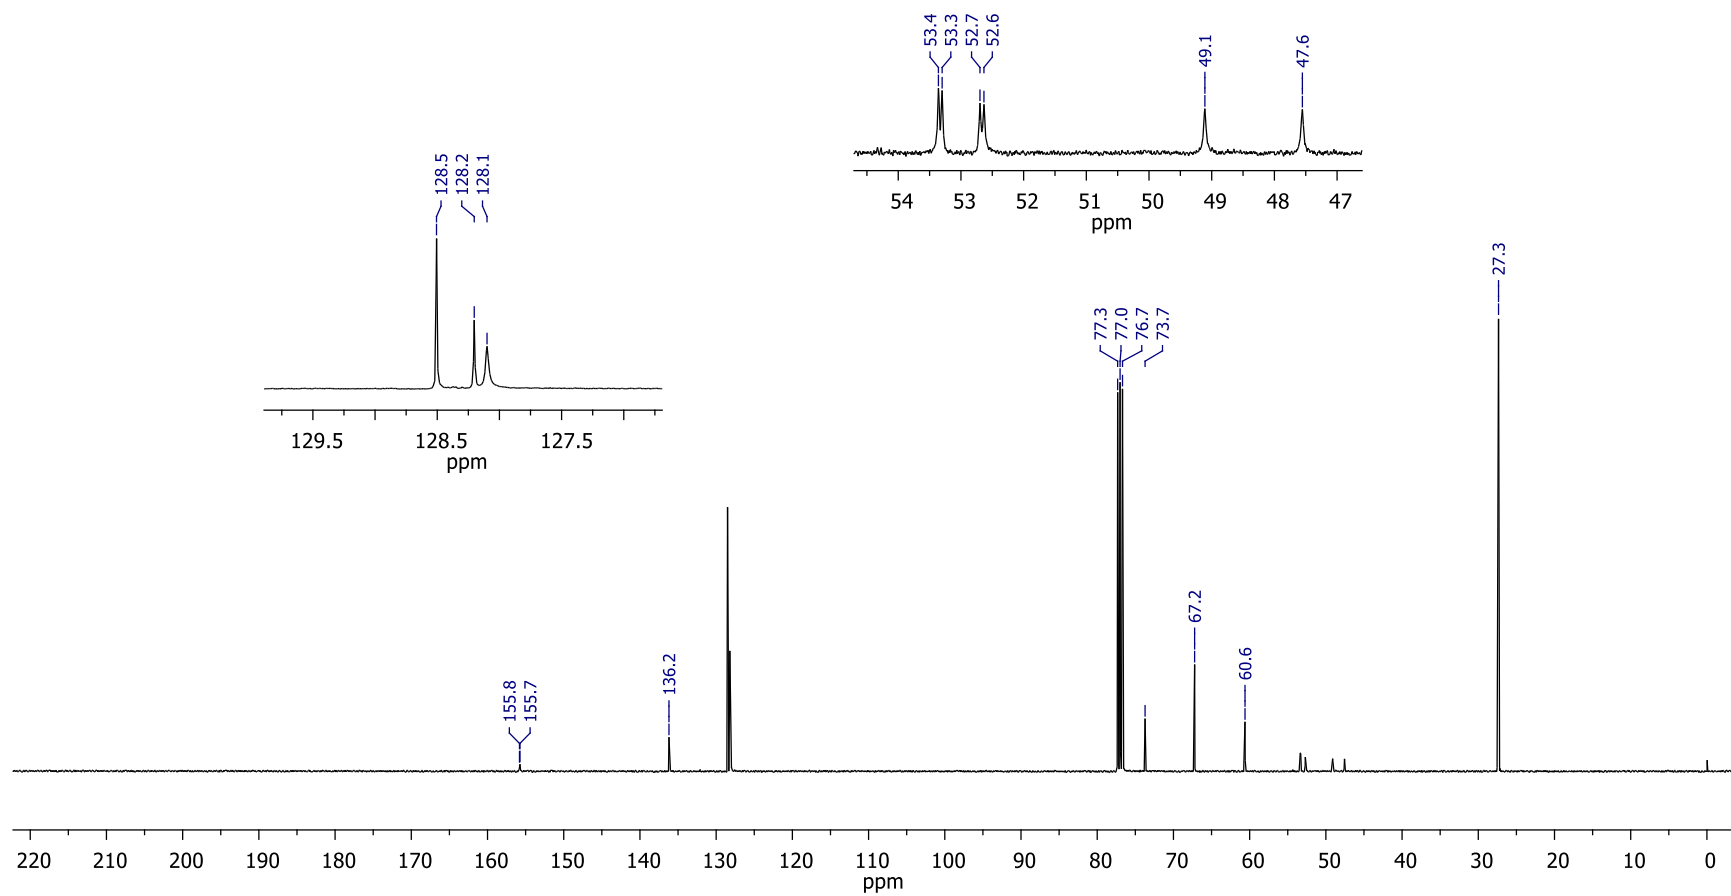

$^{31}\text{P}$  NMR [162 MHz/ $\text{CDCl}_3$ ]: (*R*)-Benzyl *N*-[2-(*tert*-butoxy)-1-(dimethoxyphosphoryl)ethyl]carbamate (**3j**)

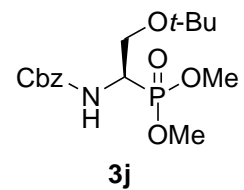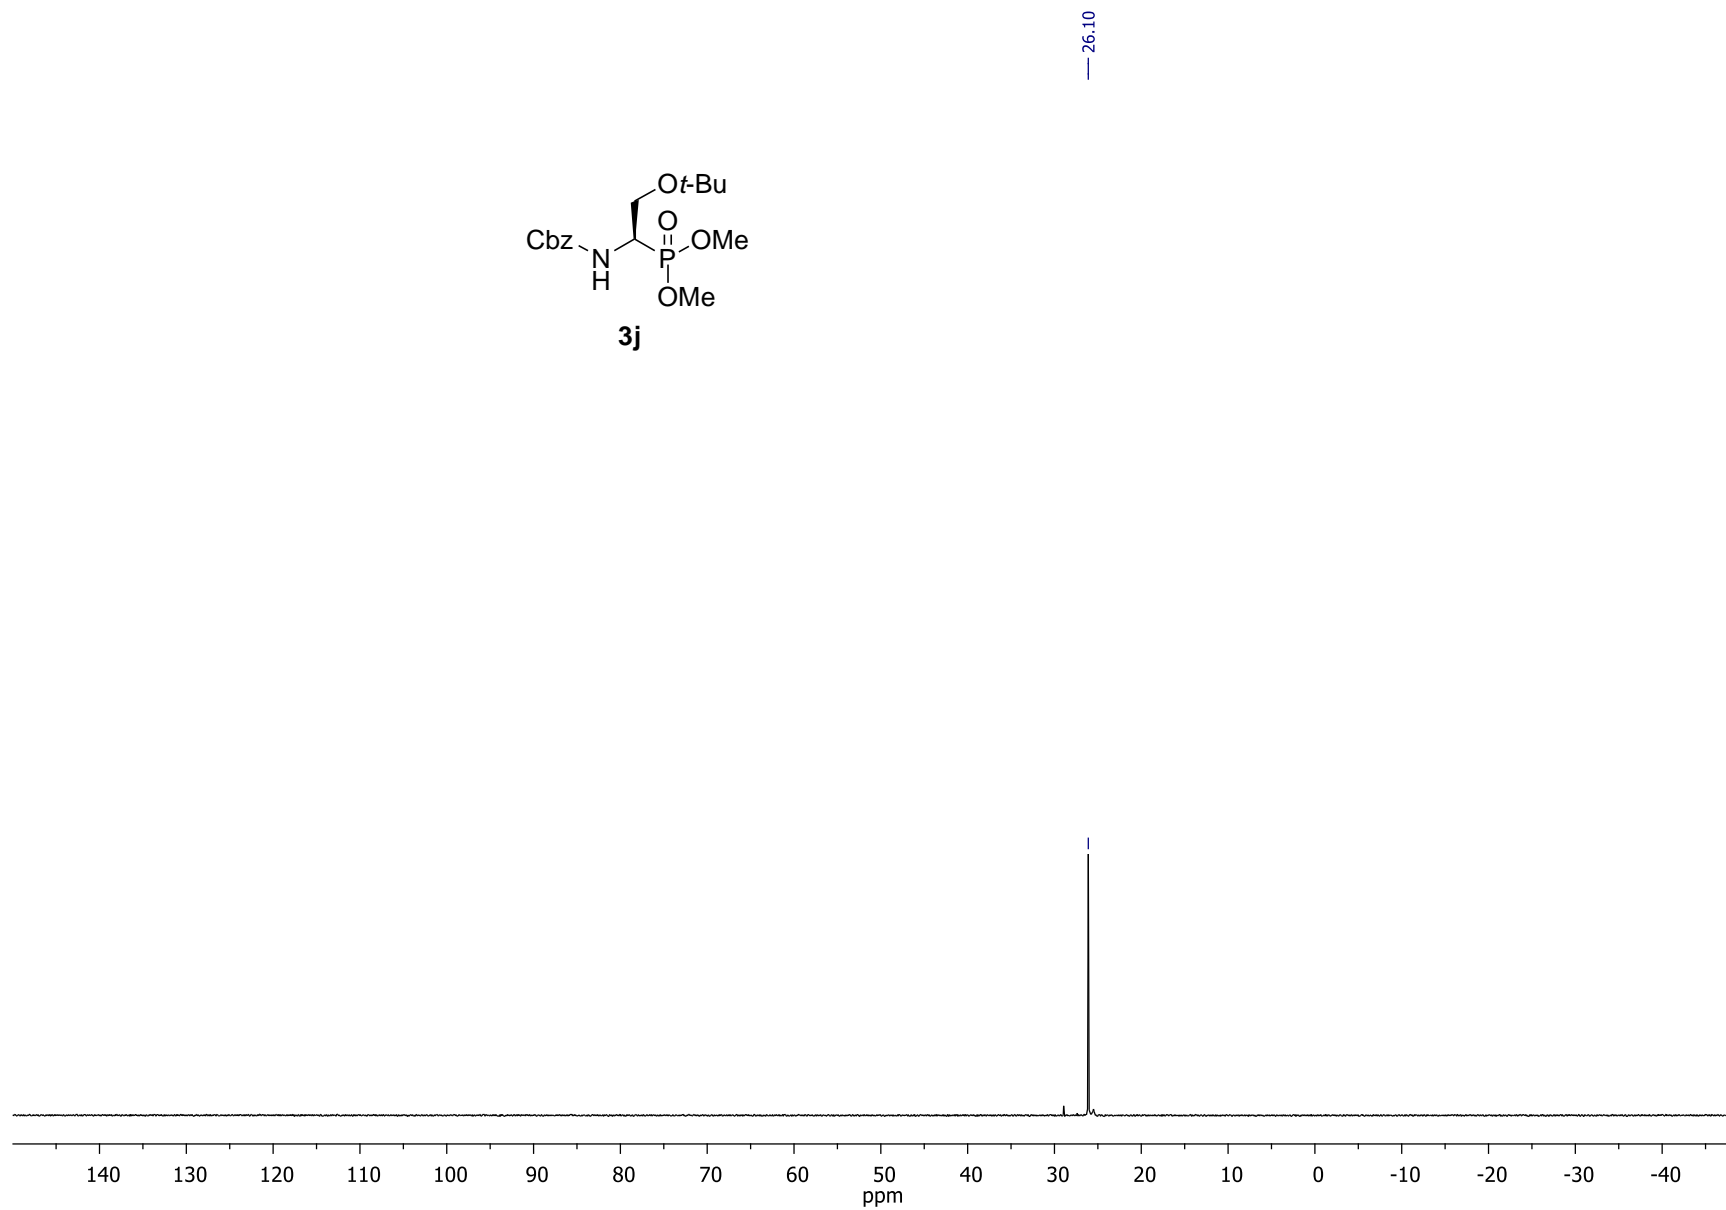

# HRMS: (*R*)-Benzyl *N*-[2-(*tert*-butoxy)-1-(dimethoxyphosphoryl)ethyl]carbamate (**3j**)

Tolerance = 10.0 PPM / DBE: min = -20.0, max = 100.0

Element prediction: Off

Number of isotope peaks used for i-FIT = 2

Monoisotopic Mass, Even Electron Ions

57 formula(e) evaluated with 1 results within limits (up to 5 closest results for each mass)

Elements Used:

| Mass     | RA     | Calc. Mass | mDa | PPM | DBE | Formula                                                                                      | i-FIT | i-FIT Norm | Fit Conf % | C  | H  | N | O | Na | P |
|----------|--------|------------|-----|-----|-----|----------------------------------------------------------------------------------------------|-------|------------|------------|----|----|---|---|----|---|
| 382.1398 | 100.00 | 382.1395   | 0.3 | 0.8 | 4.5 | C <sub>16</sub> H <sub>26</sub> N <sub>1</sub> O <sub>6</sub> Na <sub>1</sub> P <sub>1</sub> | 508.8 | n/a        | n/a        | 16 | 26 | 1 | 6 | 1  | 1 |

AWA-88 61 (0.153) Cm (61.72)

1: TOF MS ES+

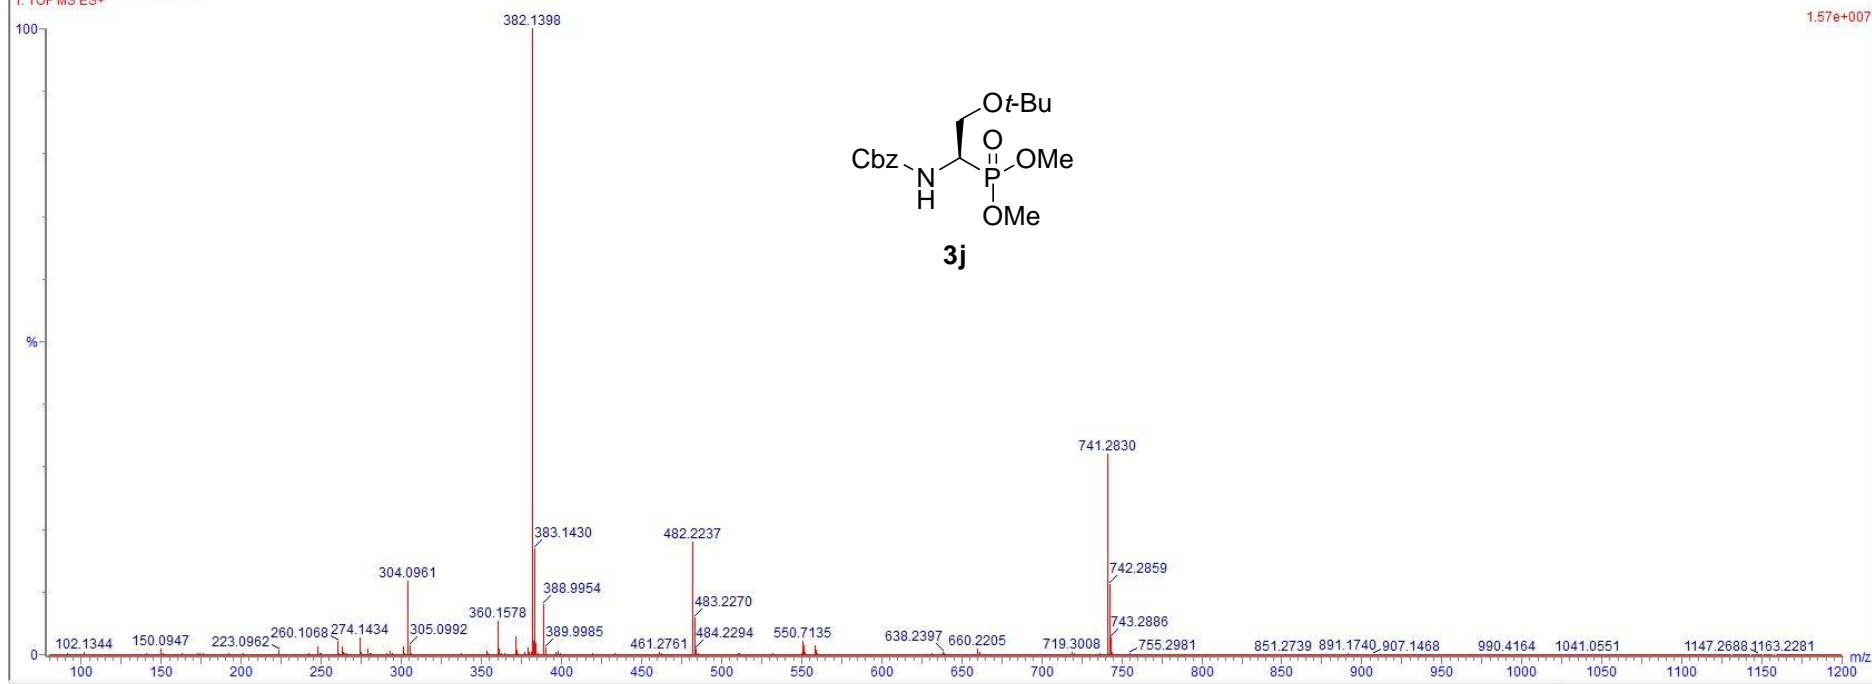

<sup>1</sup>H NMR [400 MHz/CDCl<sub>3</sub>/TMS]: (*R*)-*tert*-Butyl *N*-[2-(benzyloxy)-1-(dimethoxyphosphoryl)ethyl]carbamate (**3k**)

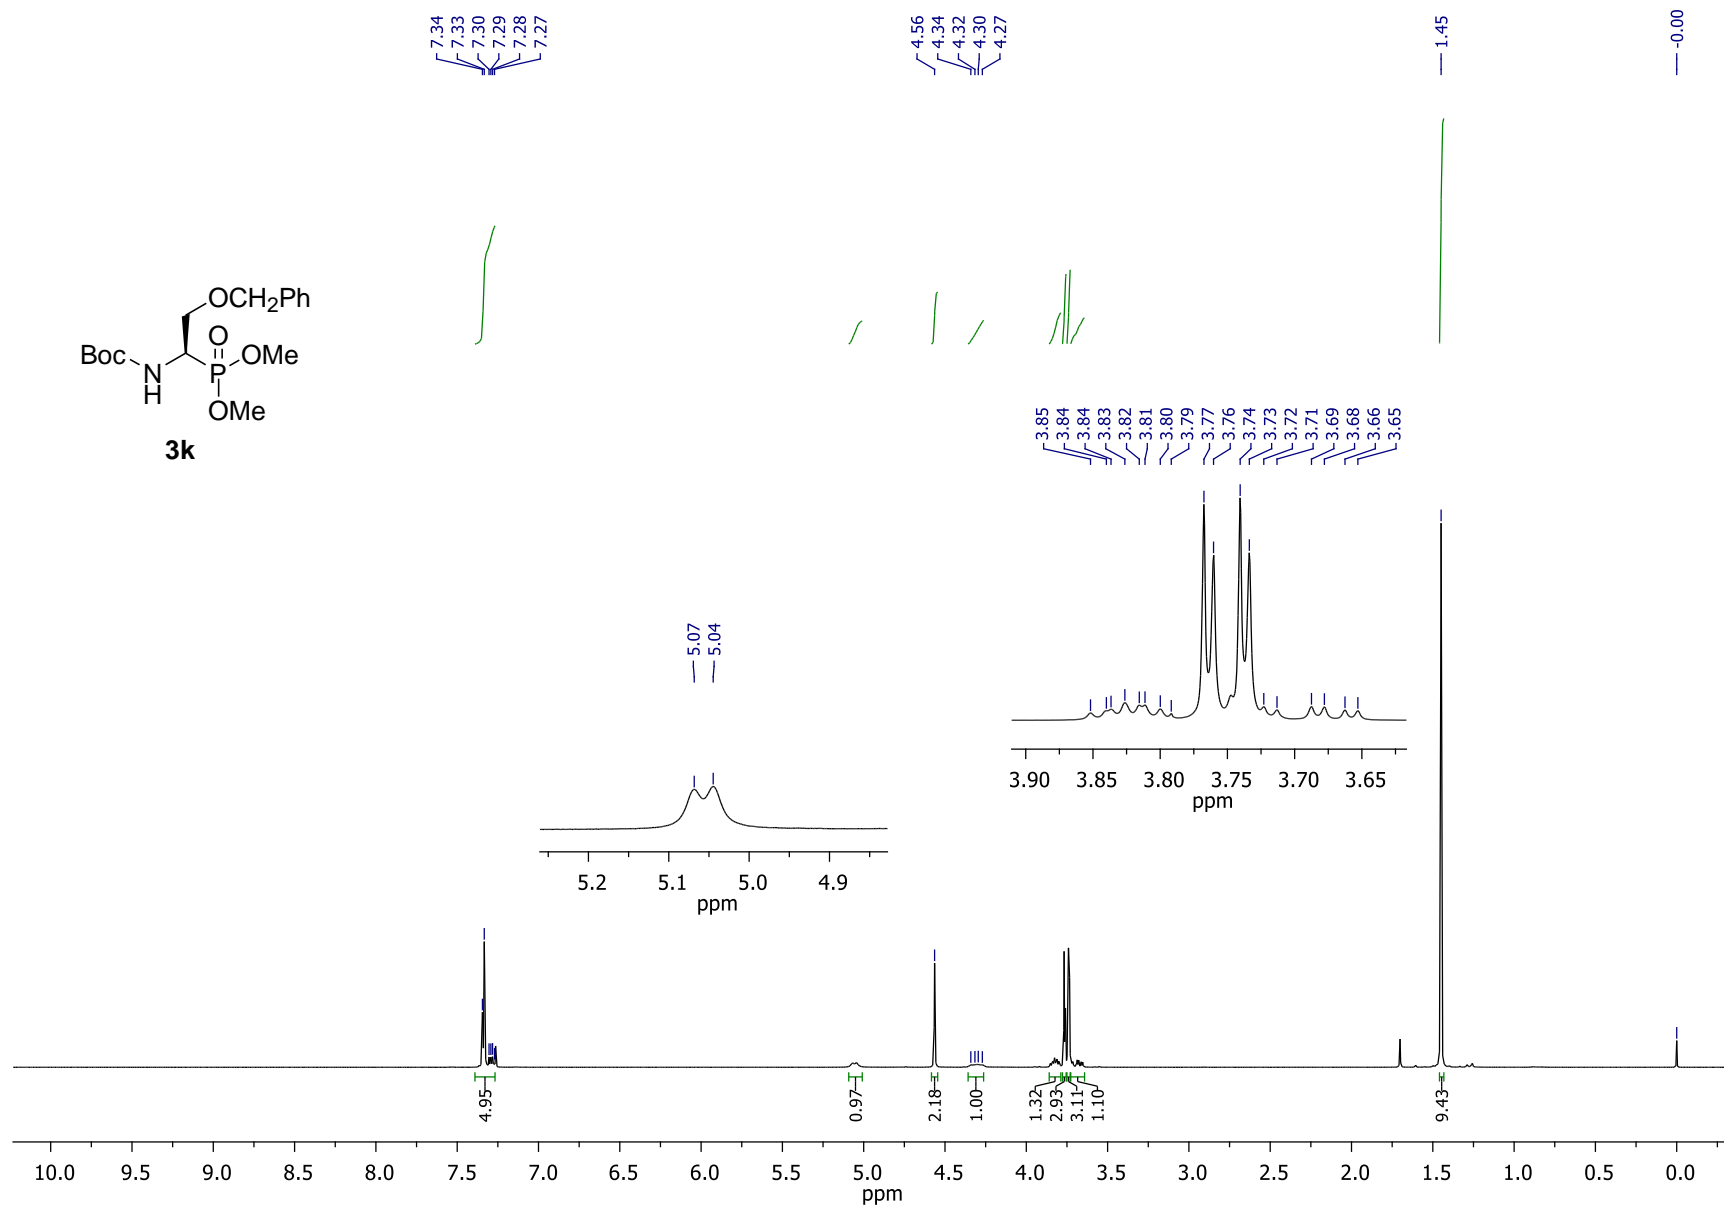

<sup>13</sup>C NMR [100 MHz/CDCl<sub>3</sub>]: (*R*)-*tert*-Butyl *N*-[2-(benzyloxy)-1-(dimethoxyphosphoryl)ethyl]carbamate (**3k**)

1

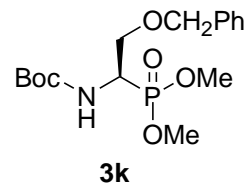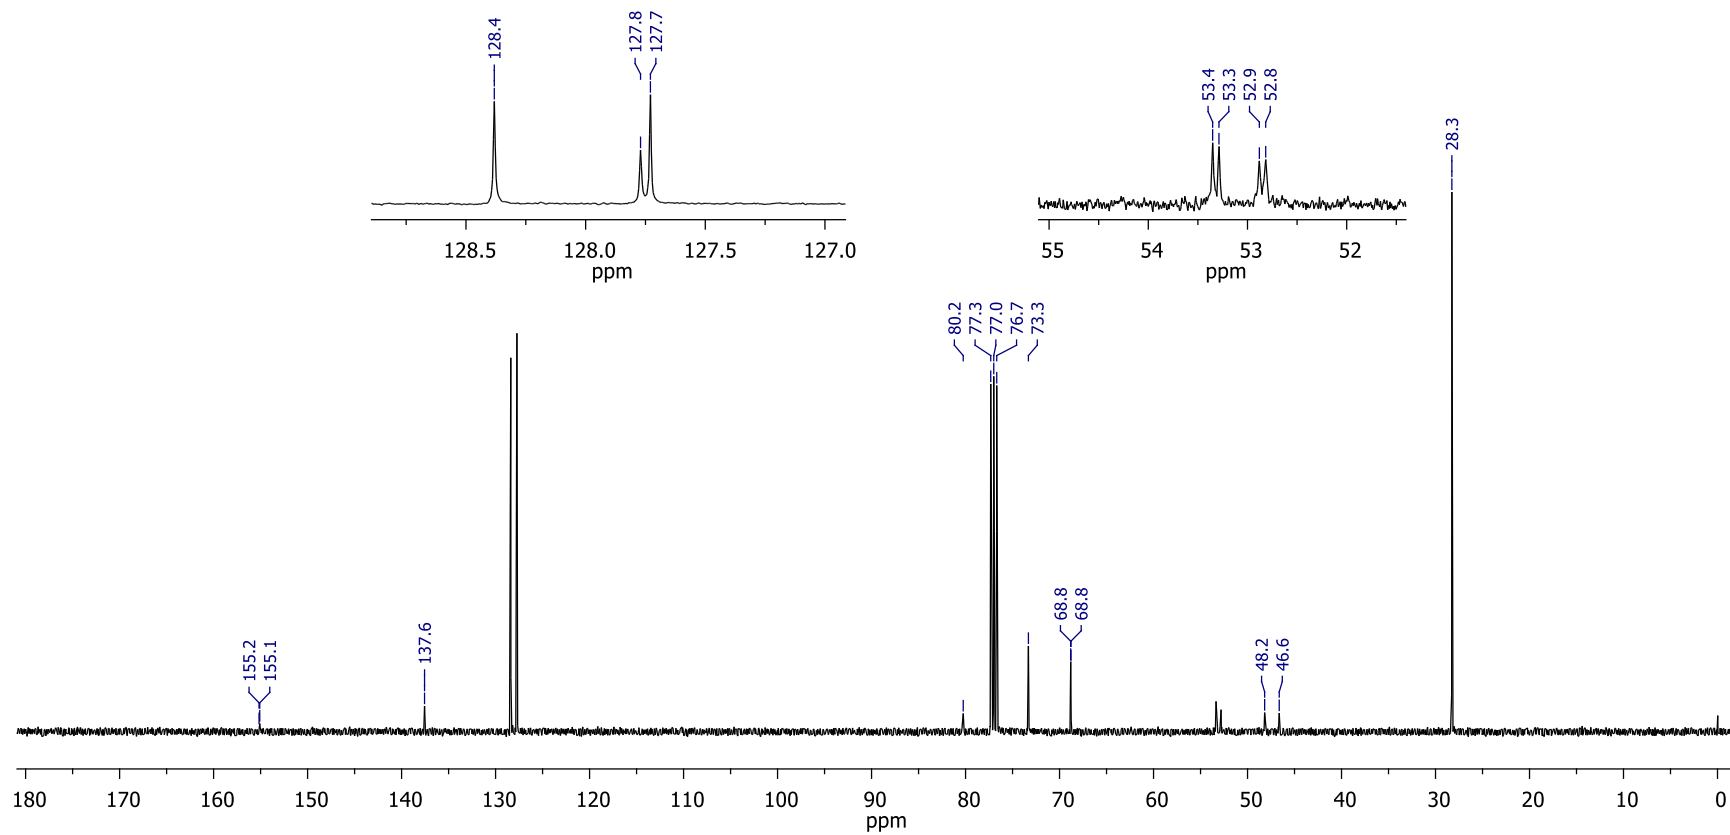

<sup>31</sup>P NMR [162 MHz/CDCl<sub>3</sub>]: (*R*)-*tert*-Butyl *N*-[2-(benzyloxy)-1-(dimethoxyphosphoryl)ethyl]carbamate (**3k**)

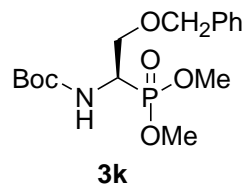

— 25.7

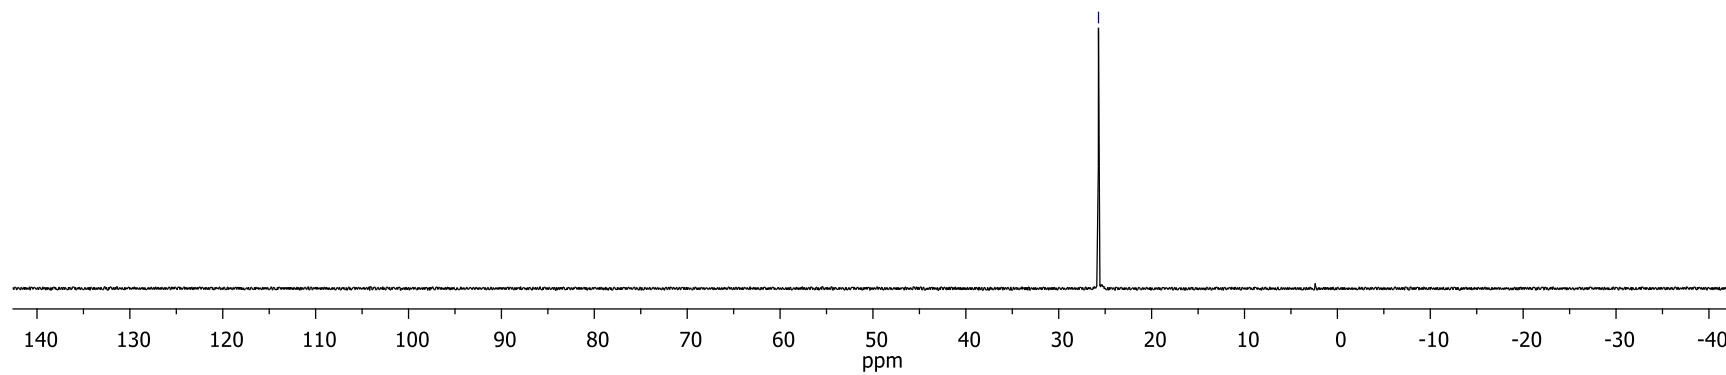

S48



HRMS: (*R*)-*tert*-Butyl *N*-[2-(benzyloxy)-1-(dimethoxyphosphoryl)ethyl]carbamate (**3k**).

Tolerance = 10.0 PPM / DBE: min = -20.0, max = 100.0

Element prediction: Off

Number of isotope peaks used for i-FIT = 2

Monoisotopic Mass, Even Electron Ions

57 formula(e) evaluated with 1 results within limits (up to 5 closest results for each mass)

Elements Used:

| Mass     | RA     | Calc. Mass | mDa  | PPM  | DBE | Formula                                               | i-FIT | i-FIT Norm | Fit Conf % | C  | H  | N | O | Na | P |
|----------|--------|------------|------|------|-----|-------------------------------------------------------|-------|------------|------------|----|----|---|---|----|---|
| 382.1390 | 100.00 | 382.1395   | -0.5 | -1.3 | 4.5 | C <sub>16</sub> H <sub>26</sub> N O <sub>6</sub> Na P | 434.3 | n/a        | n/a        | 16 | 26 | 1 | 6 | 1  | 1 |

AWA-192 322 (0.709) Cm (319.330)

1: TOF MS ES+

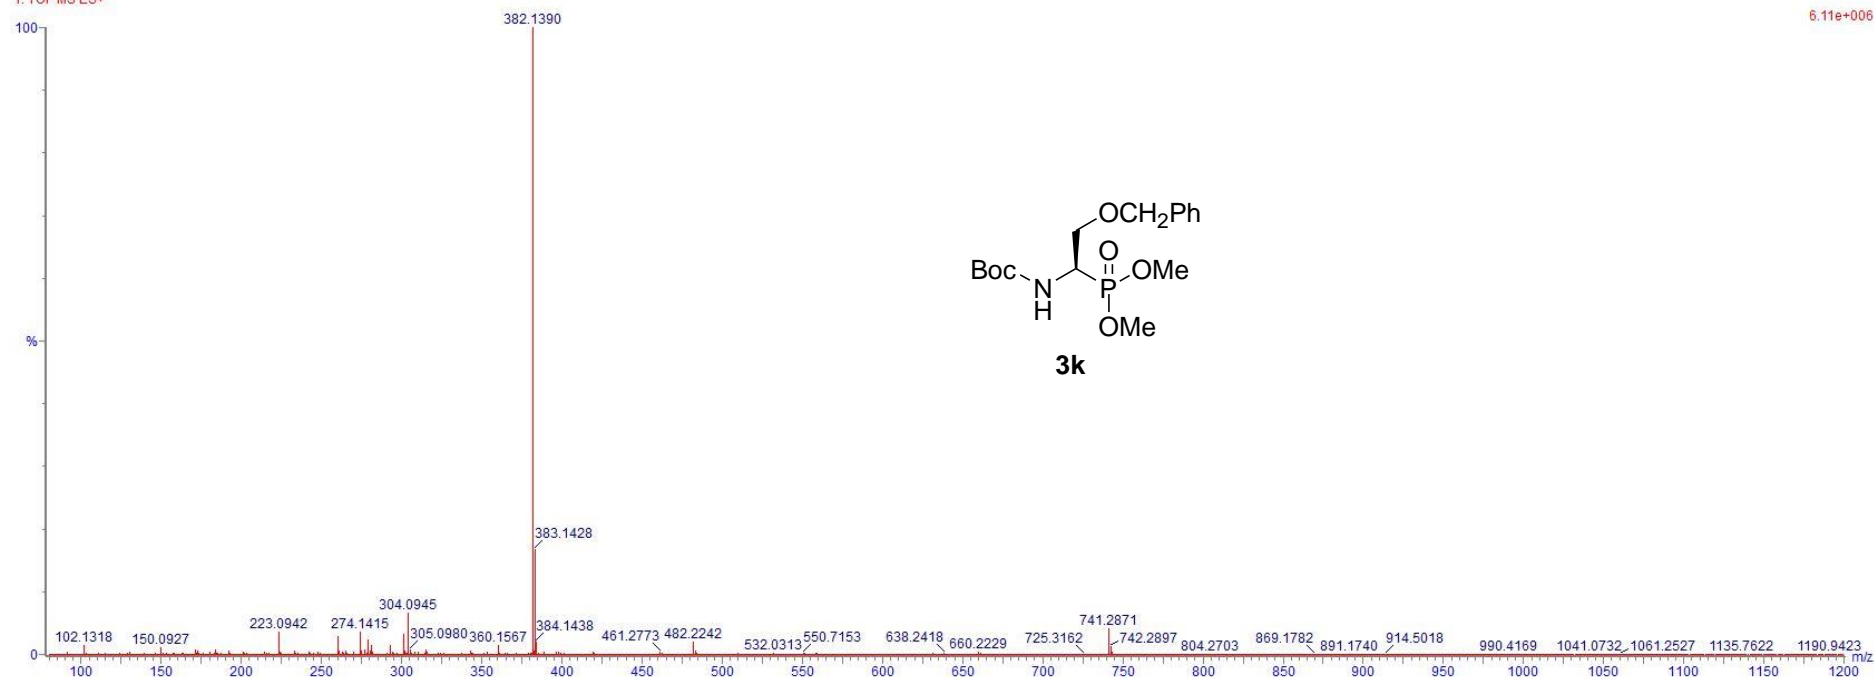

**HPLC conditions:**

Column: Chiralpak AD-H  
Eluent: 10% *i*-PrOH/hexane  
Flow: 0.75mL/min  
Detection: UV, 210 nm

| Signal | Retention time | % Area |
|--------|----------------|--------|
| 1      | 18.0           | 49.6   |
| 2      | 21.8           | 50.4   |

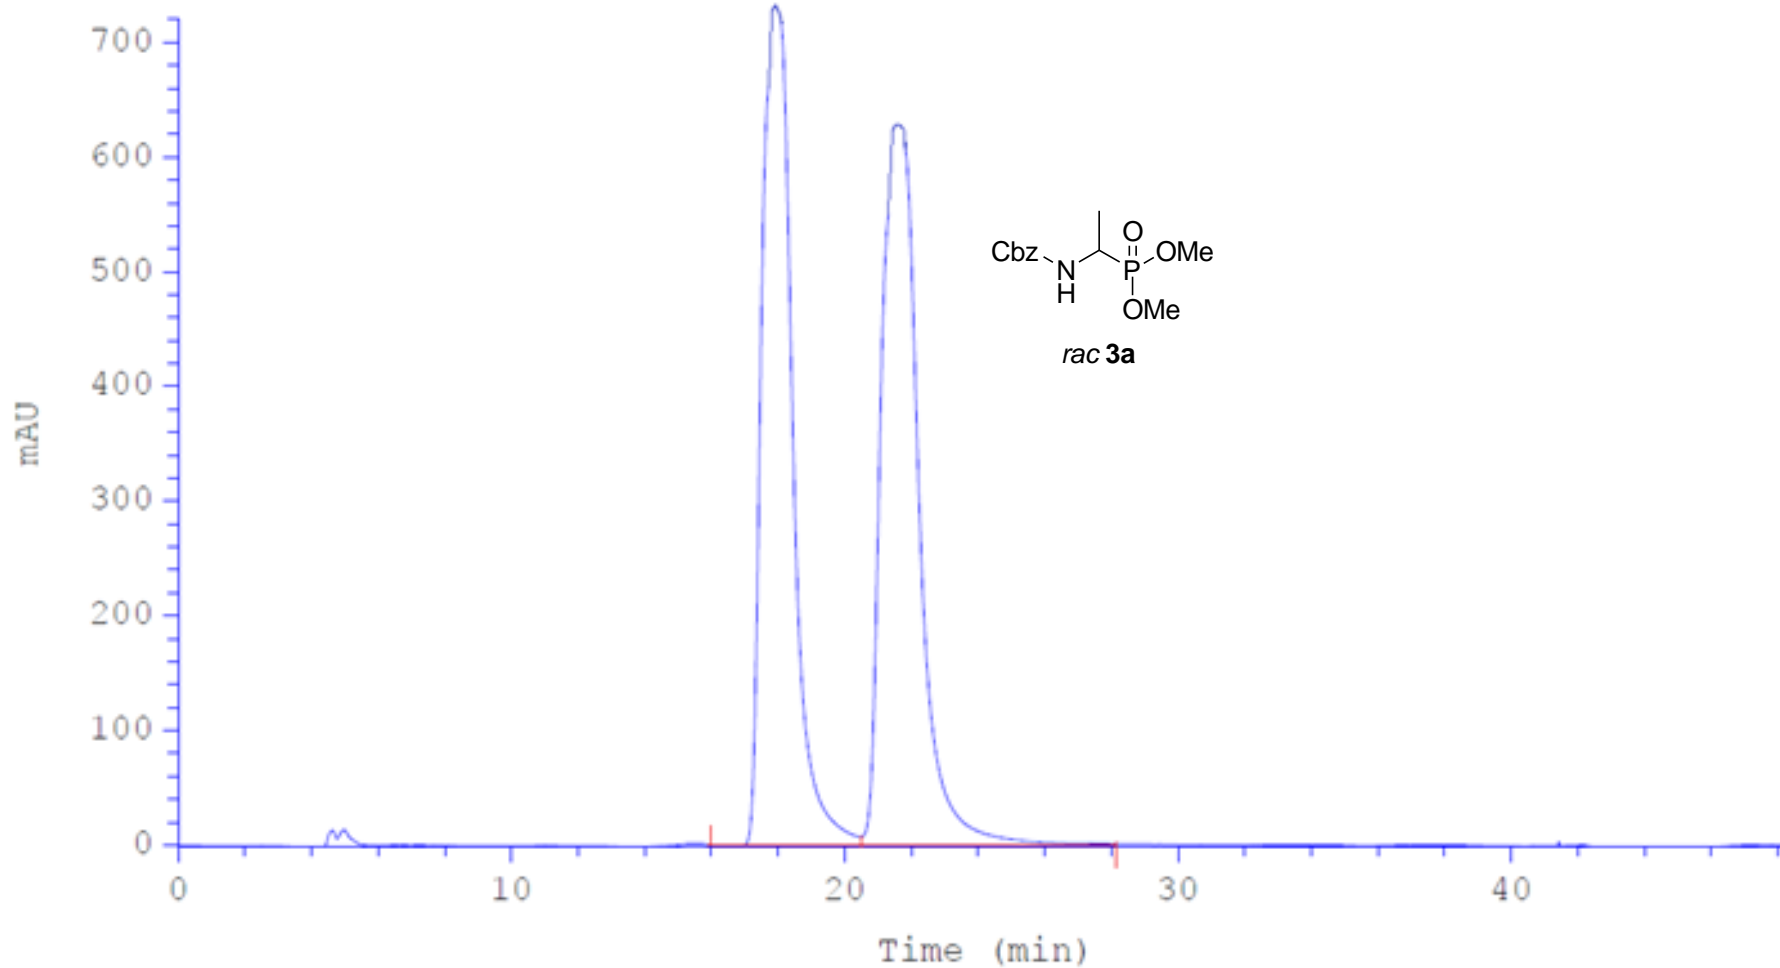

**HPLC conditions:**

Column: Chiralpak AD-H  
Eluent: 10% *i*-PrOH/hexane  
Flow: 0.75mL/min  
Detection: UV, 210 nm

| HPLC results for the catalyst <b>4</b> |                |        |
|----------------------------------------|----------------|--------|
| Signal                                 | Retention time | % Area |
| 1                                      | 17.0           | 91.9   |
| 2                                      | 20.8           | 8.1    |

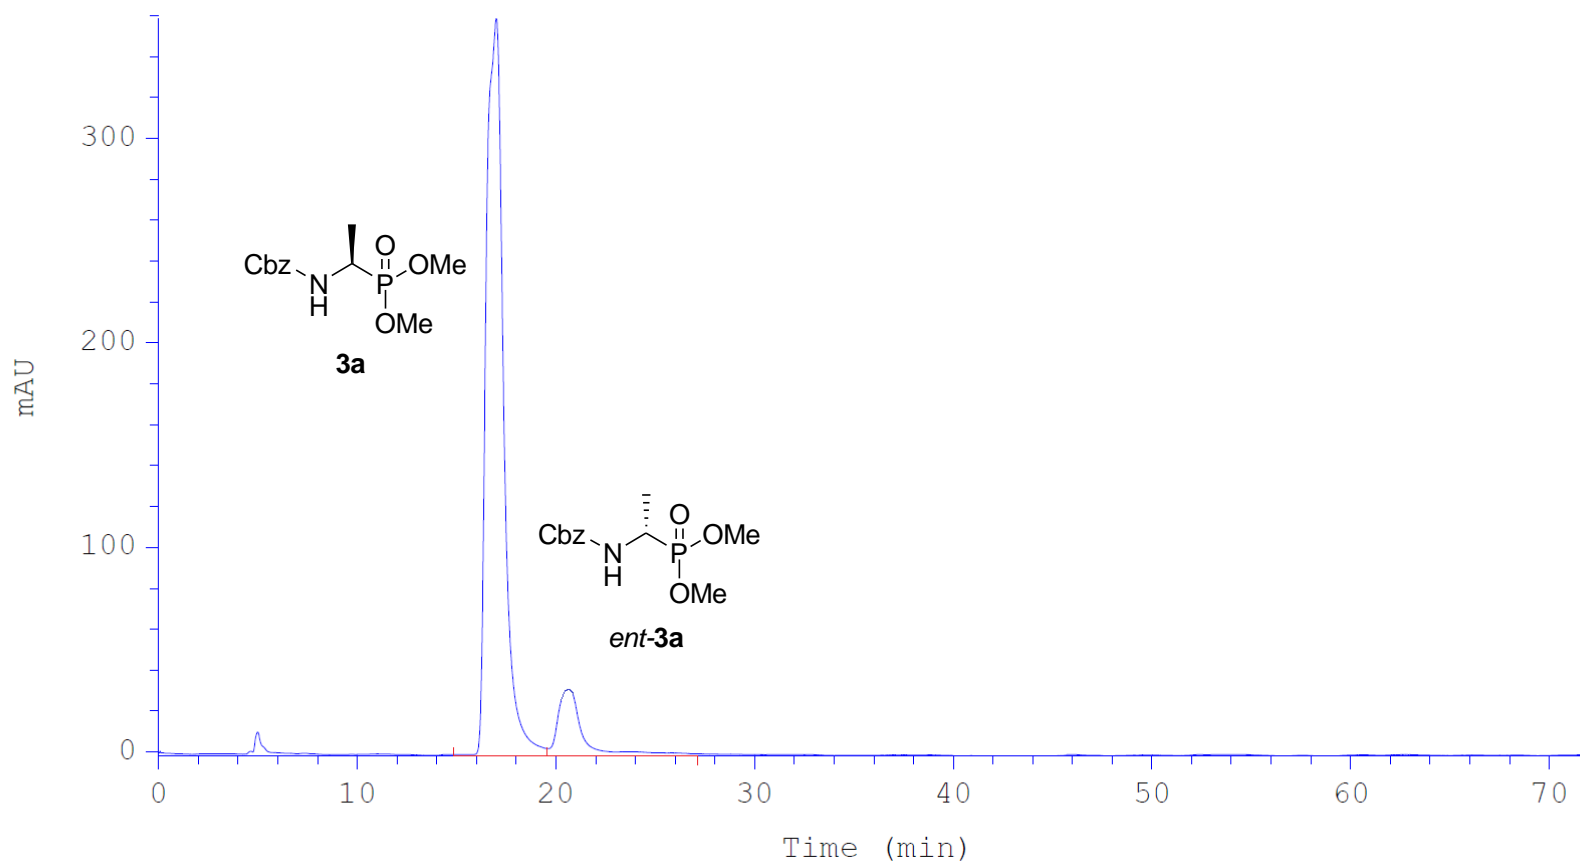

**HPLC conditions:**

Column: Chiralpak IA

Eluent: 10% *i*-PrOH/hexane

Flow: 0.75mL/min

Detection: UV, 210 nm

| Signal | Retention time | % Area |
|--------|----------------|--------|
| 1      | 16.3           | 49.3   |
| 2      | 19.0           | 50.7   |

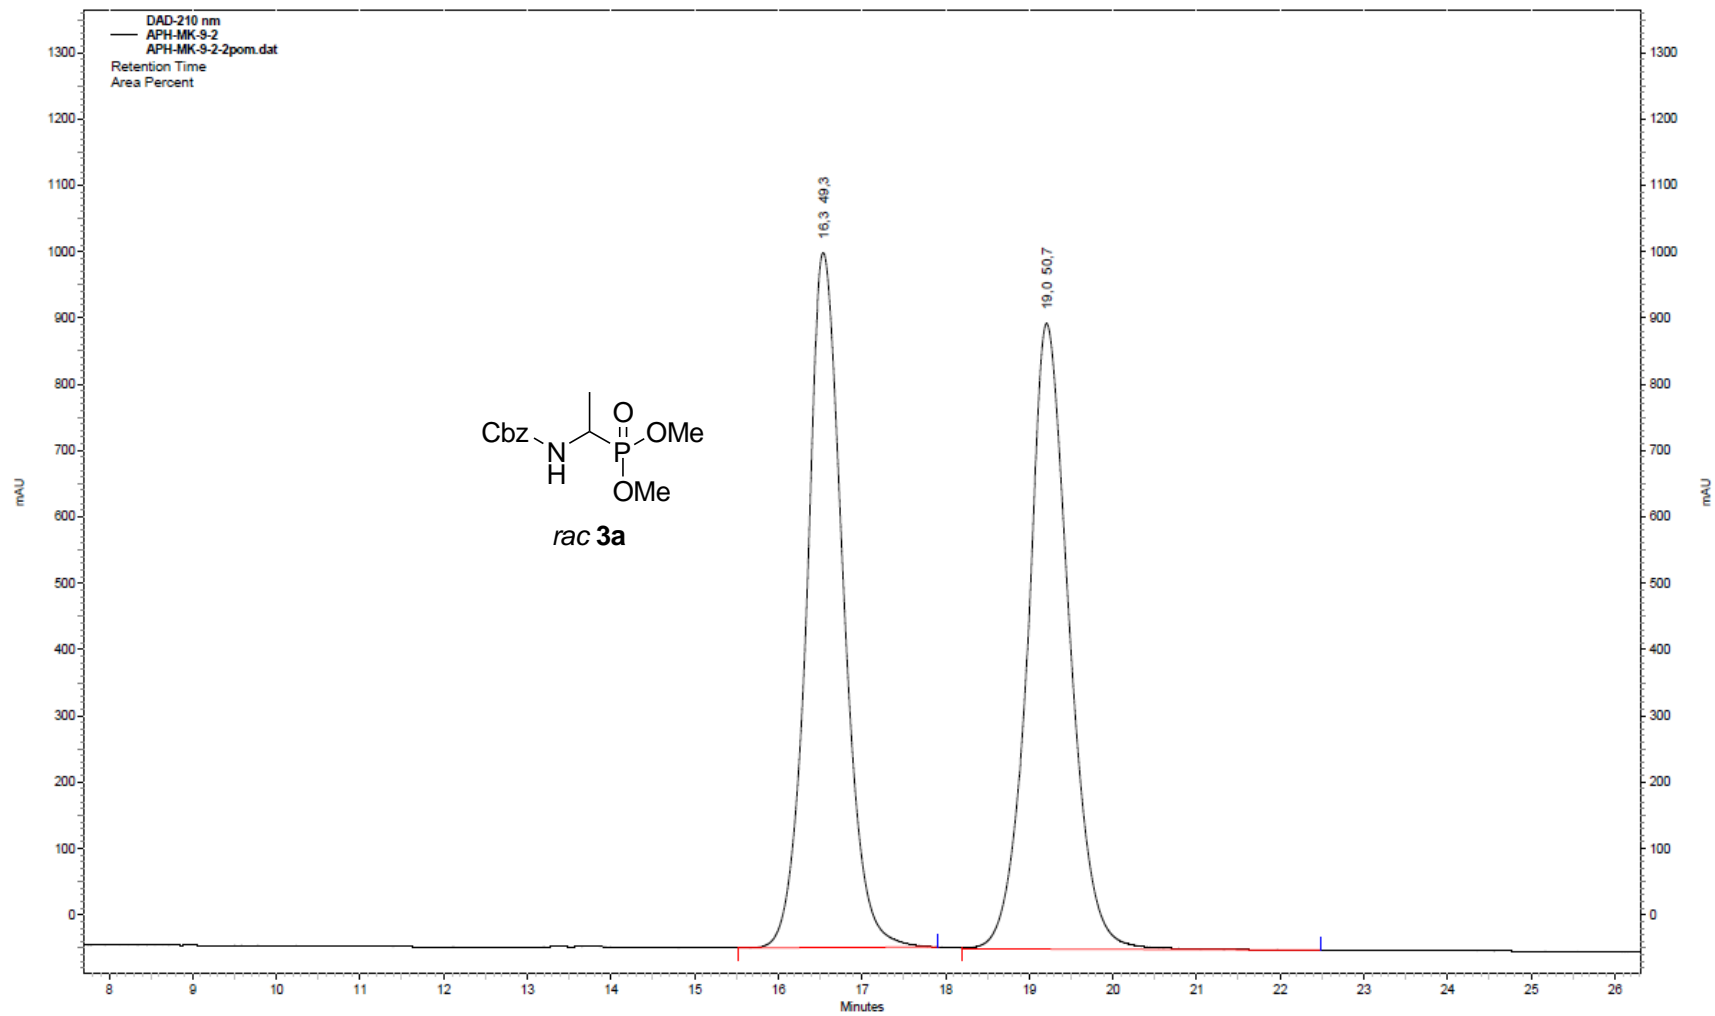

**HPLC conditions:**

Column: Chiralpak IA

Eluent: 10% *i*-PrOH/hexane

Flow: 0.75mL/min

Detection: UV, 210 nm

| HPLC results for the catalyst <b>5</b> |                |        |
|----------------------------------------|----------------|--------|
| Signal                                 | Retention time | % Area |
| 1                                      | 15.5           | 91.3   |
| 2                                      | 18.8           | 8.7    |

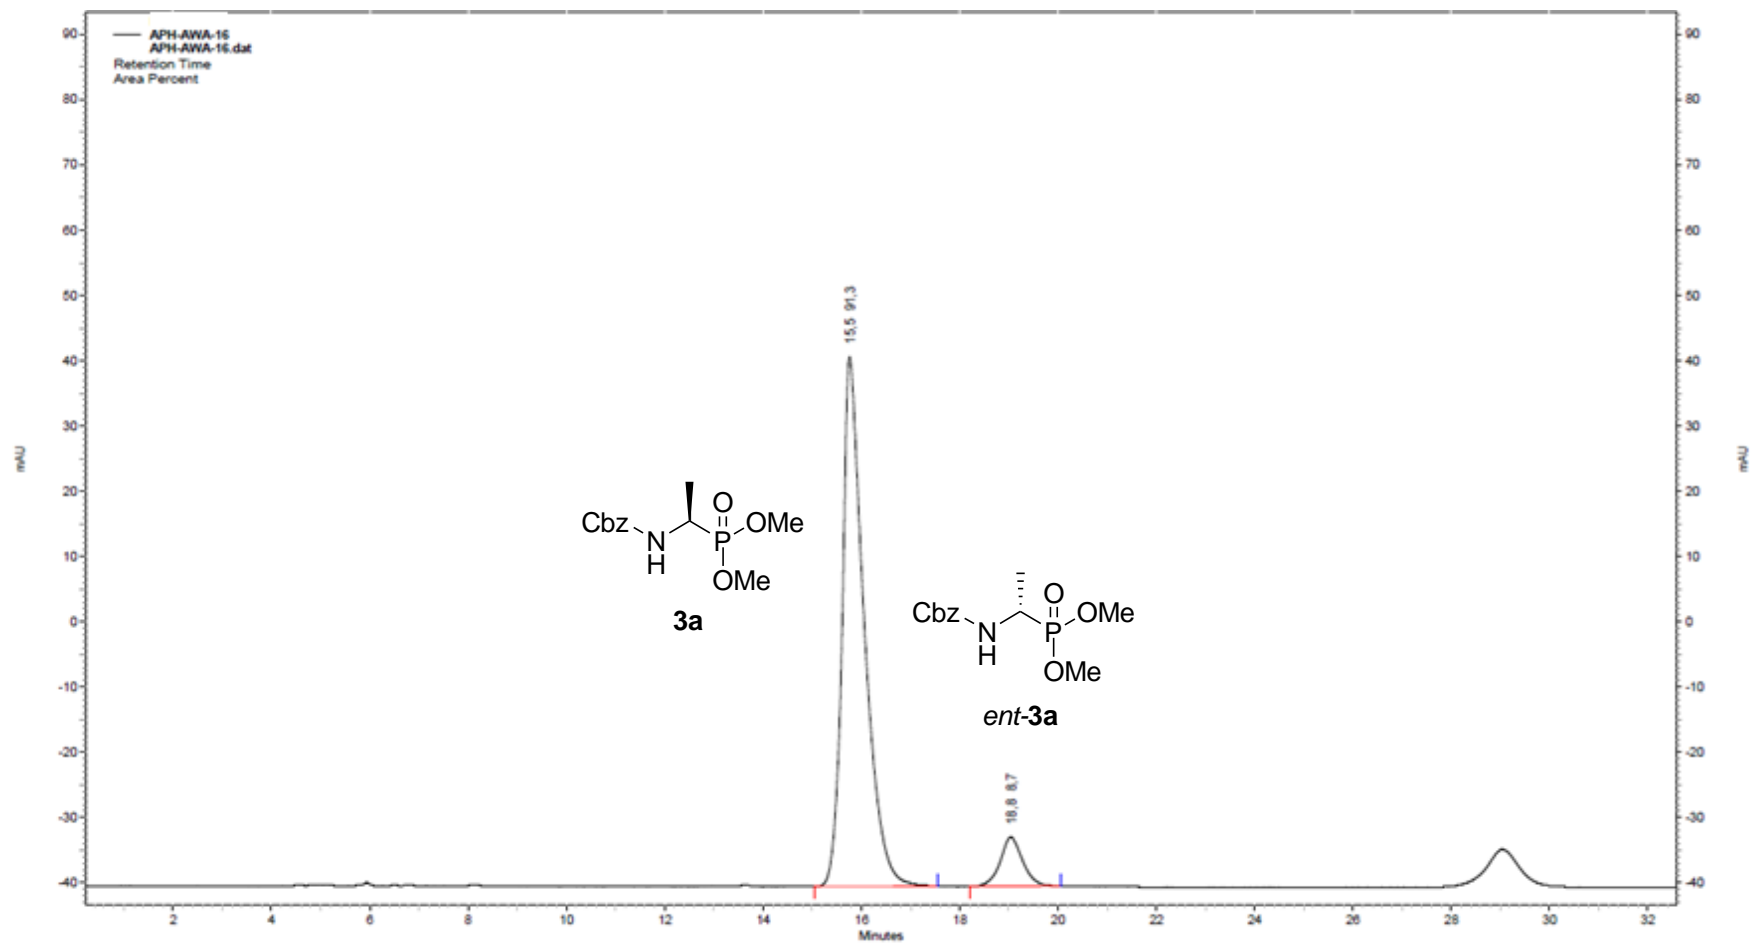

**HPLC conditions:**

Column: Chiralpak AD-H

Eluent: 15% *i*-PrOH/hexane

Flow: 0.8mL/min

Detection: UV, 210 nm

| Signal | Retention time | % Area |
|--------|----------------|--------|
| 1      | 19.7           | 49.2   |
| 2      | 27.8           | 50.8   |

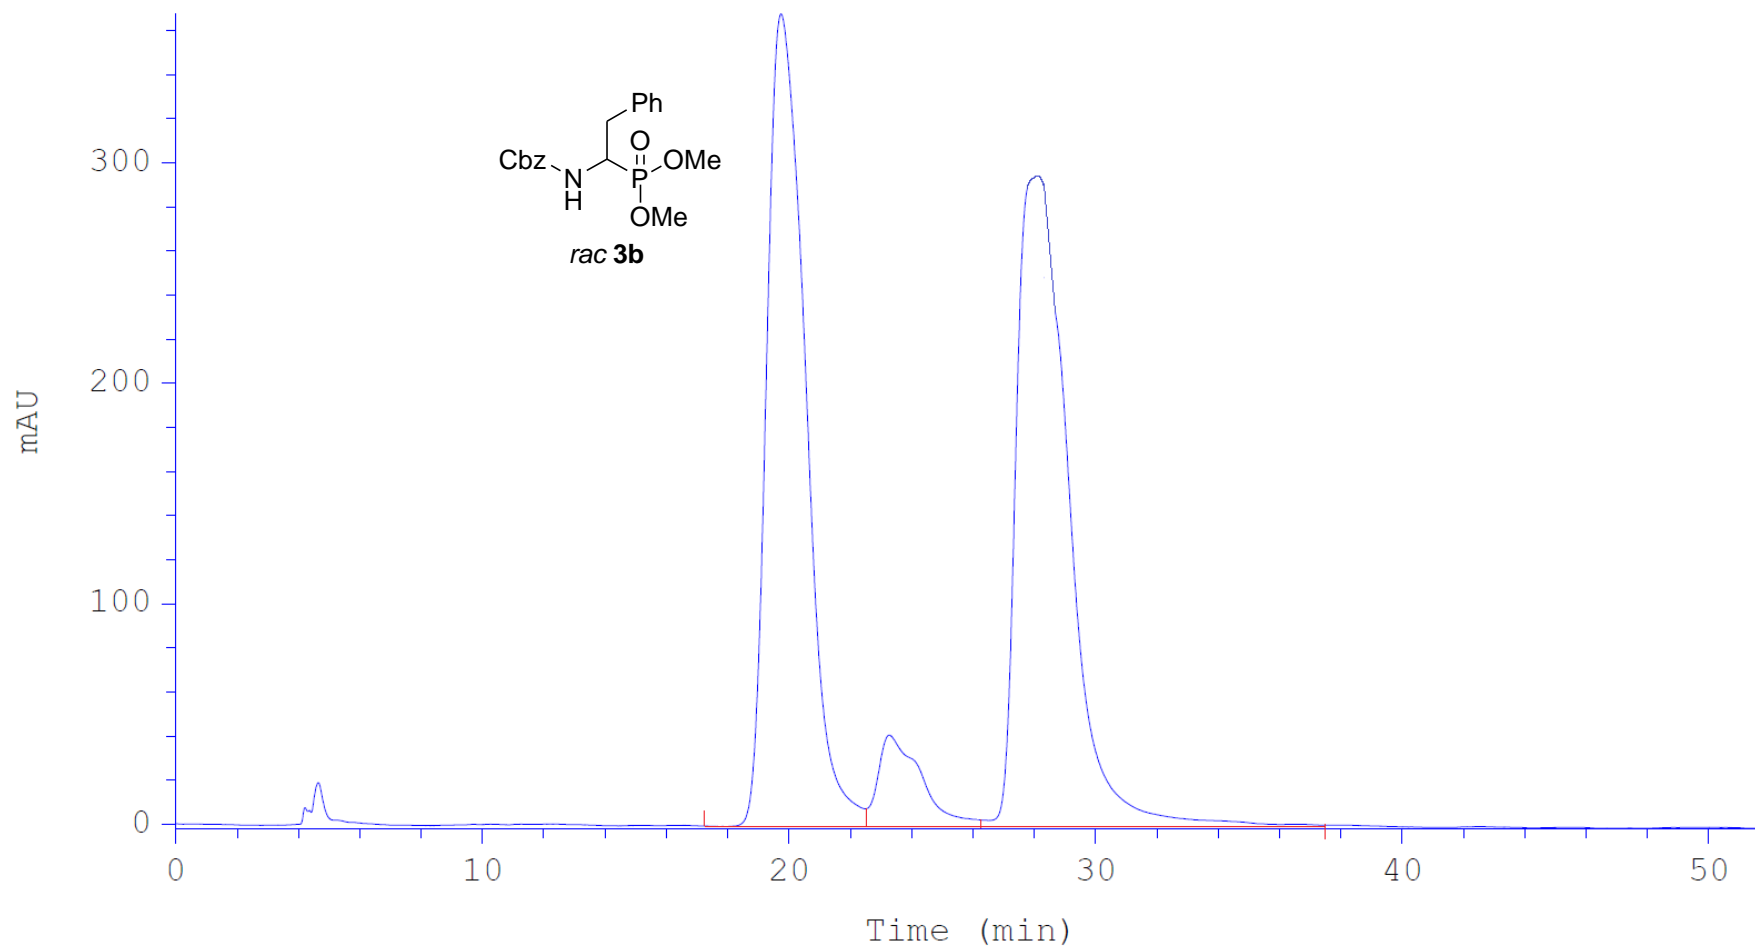

**HPLC conditions:**

Column: Chiralpak AD-H

Eluent: 15% *i*-PrOH/hexane

Flow: 0.8mL/min

Detection: UV, 210 nm

**HPLC results for the catalyst 4**

| Signal | Retention time | % Area |
|--------|----------------|--------|
| 1      | 20.6           | 86.3   |
| 2      | 28.7           | 13.7   |

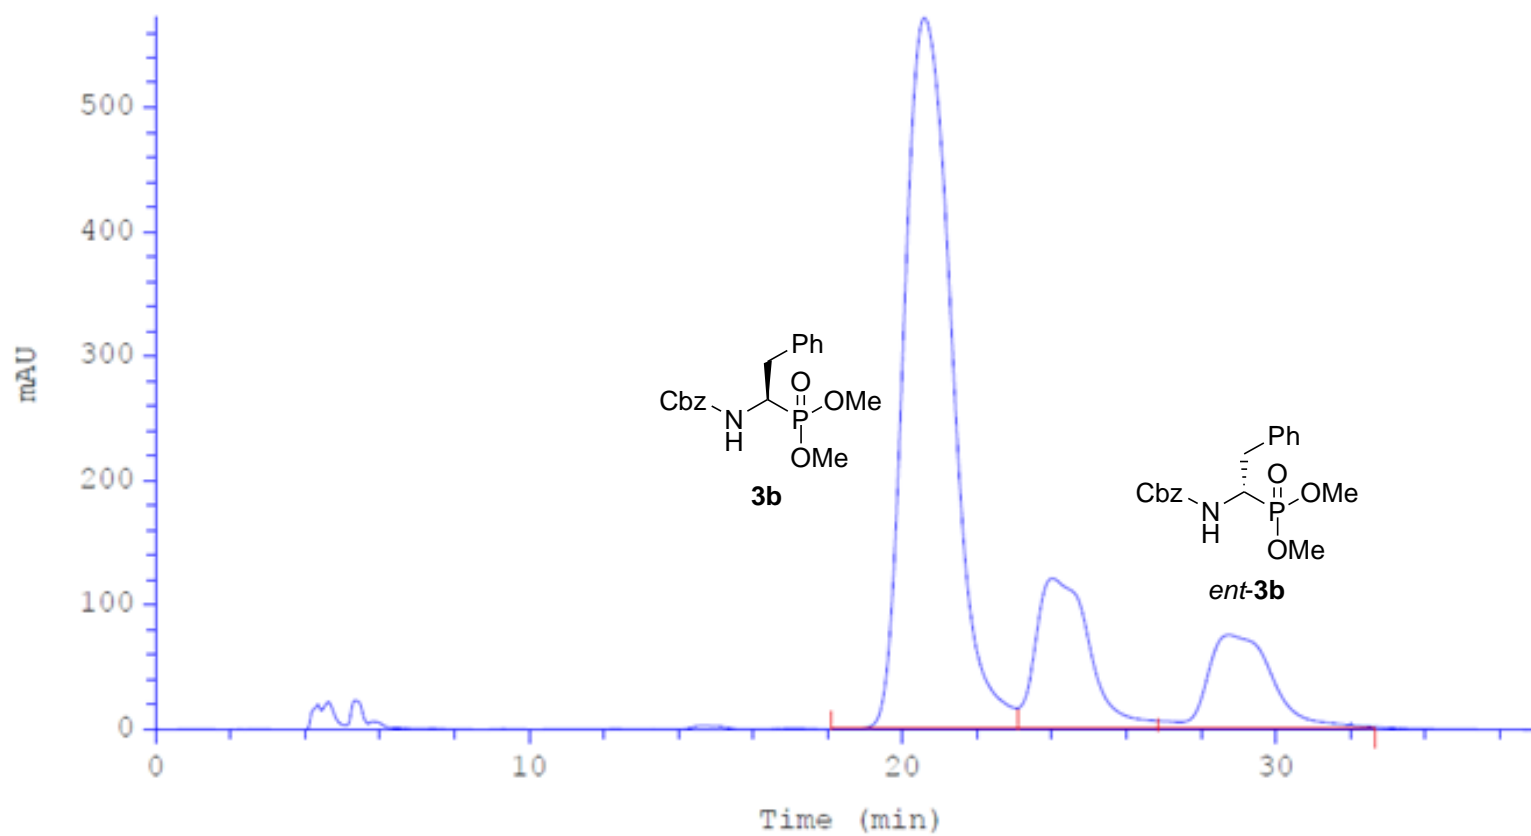

**HPLC conditions:**

Column: Chiralpak AD-H  
Eluent: 15% *i*-PrOH/hexane  
Flow: 0.5 mL/min  
Detection: UV, 210 nm

| Signal | Retention time | % Area |
|--------|----------------|--------|
| 1      | 19.5           | 51.0   |
| 2      | 26.9           | 49.0   |

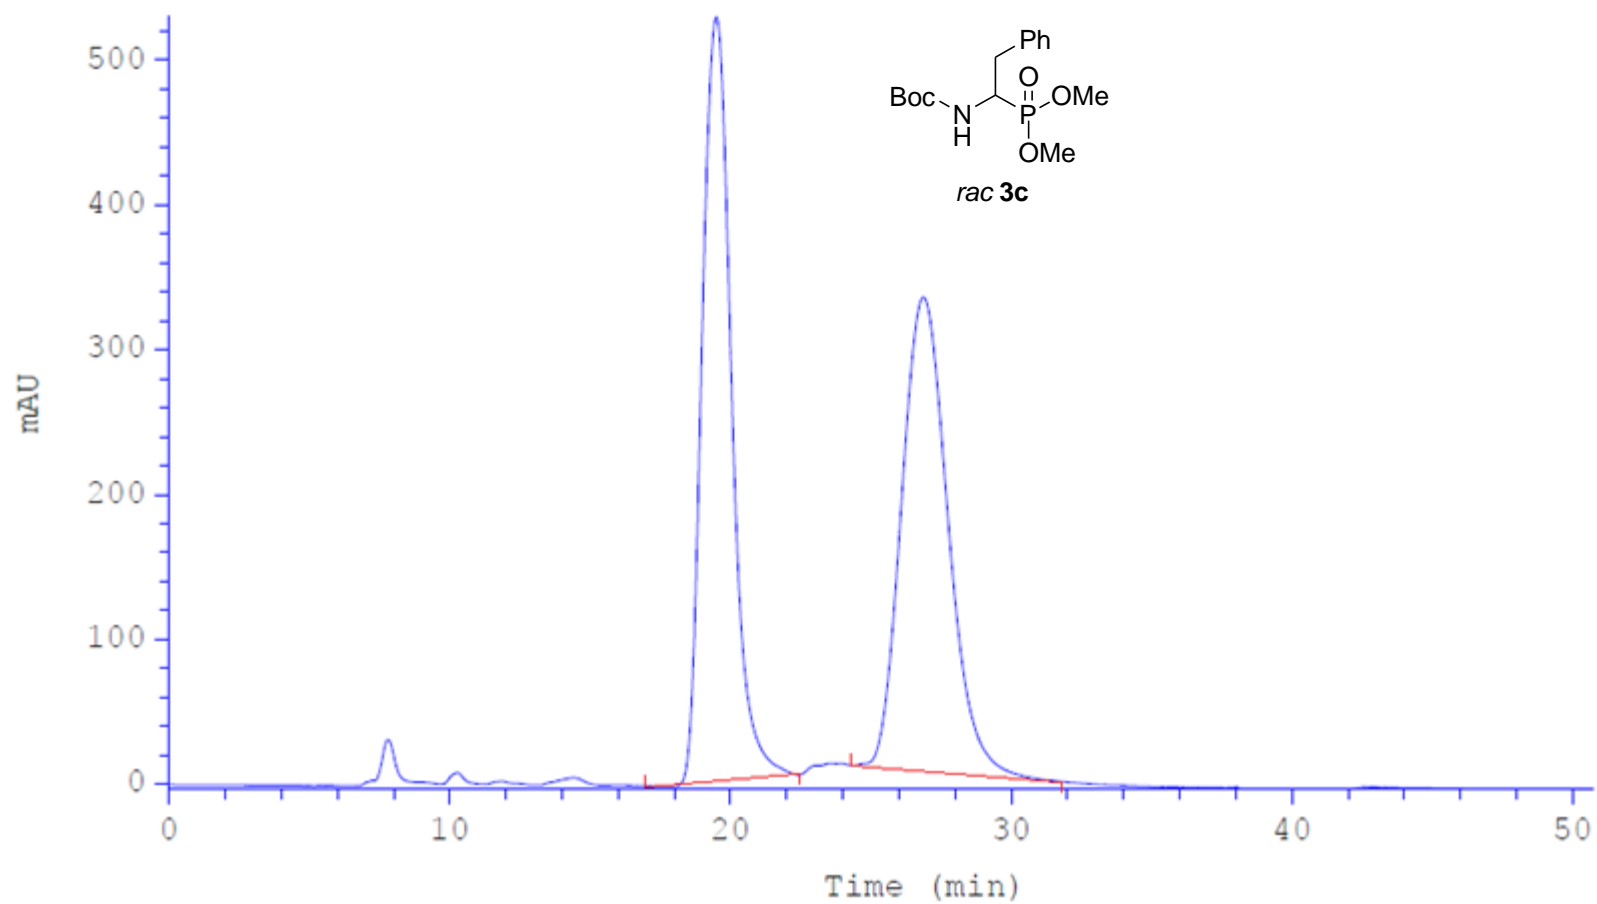



**HPLC conditions:**

Column: Chiralpak AD-H

Eluent: 15% *i*-PrOH/hexane

Flow: 0.5 mL/min

Detection: UV, 210 nm

**HPLC results for the catalyst 4**

| Signal | Retention time | % Area |
|--------|----------------|--------|
| 1      | 19.1           | 14.0   |
| 2      | 26.4           | 86.0   |

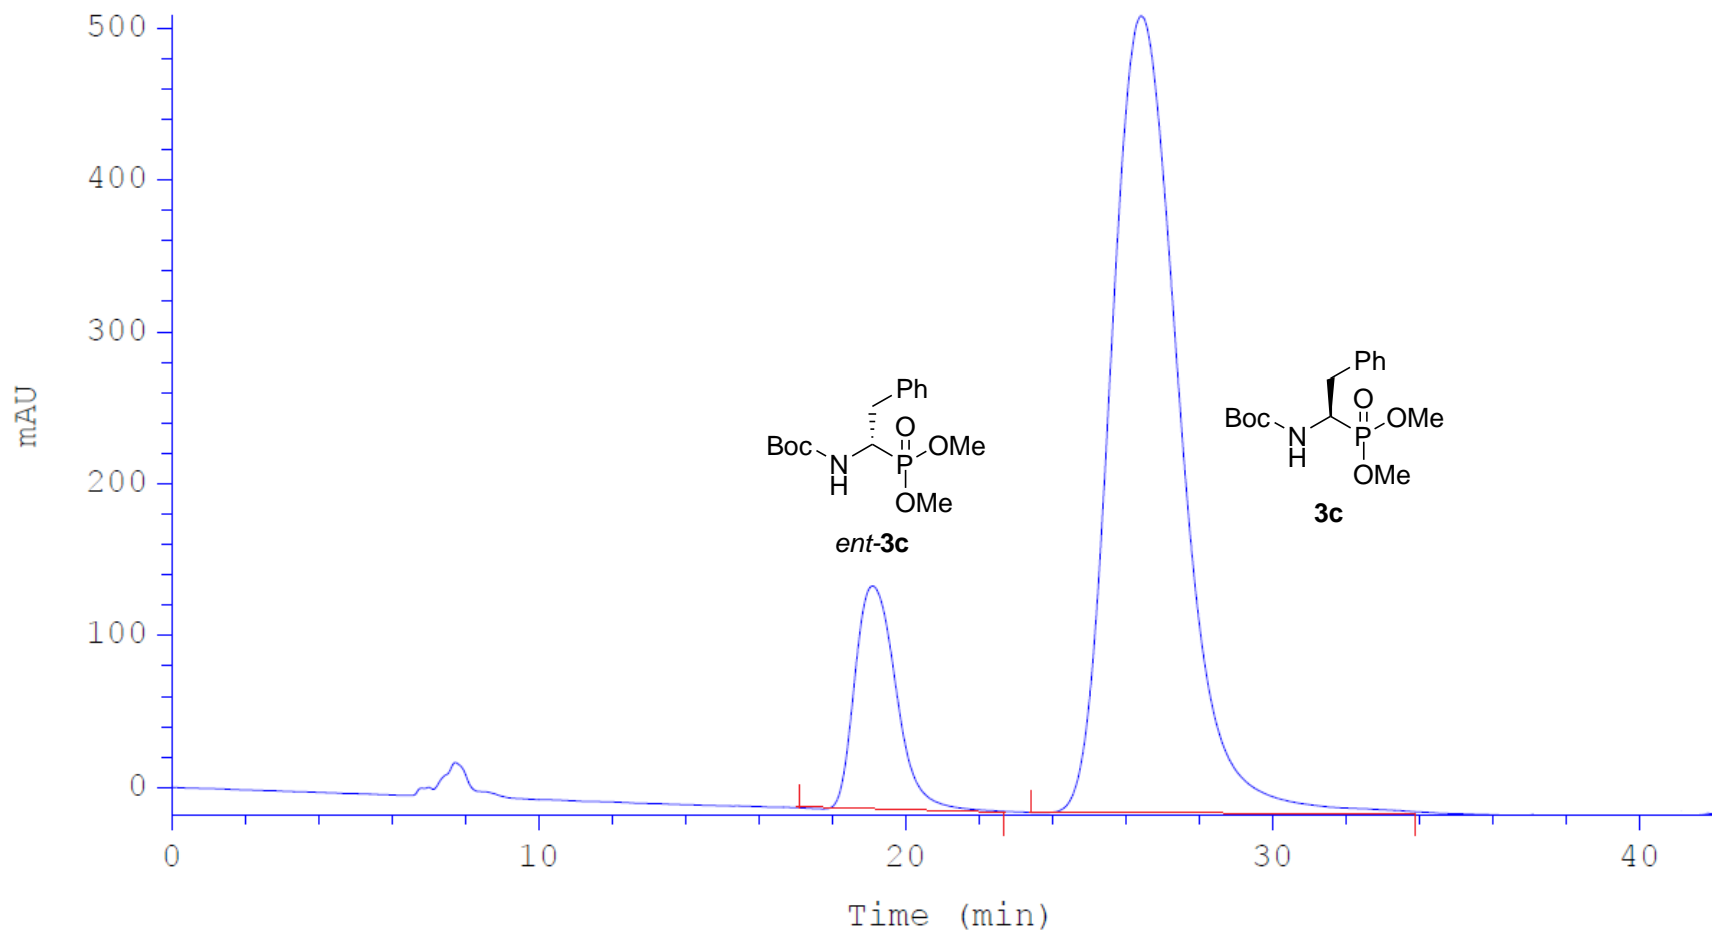

**HPLC conditions:**

Column: Chiralpak AD-H

Eluent: 15% *i*-PrOH/hexane

Flow: 0.5 mL/min

Detection: UV, 210 nm

**HPLC results for the catalyst 5**

| Signal | Retention time | % Area |
|--------|----------------|--------|
| 1      | 19.6           | 19.5   |
| 2      | 27.0           | 80.5   |

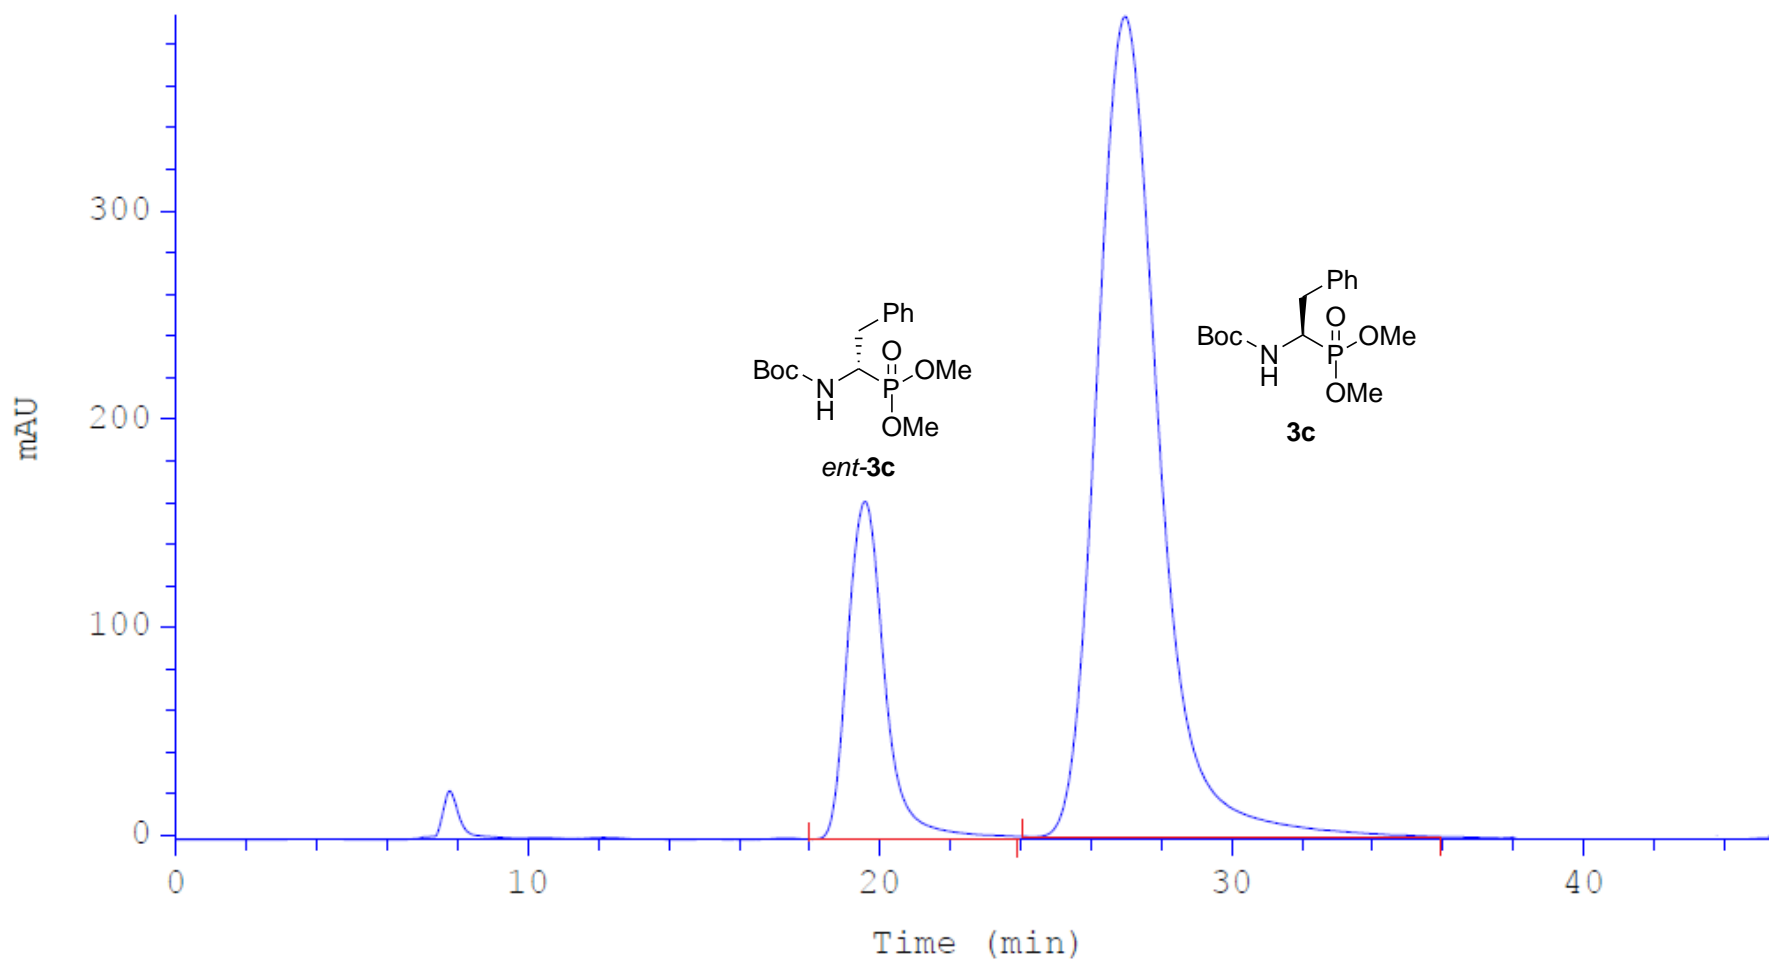

**HPLC conditions:**

Column: Chiralpak AD-H

Eluent: 10% *i*-PrOH/hexane

Flow: 0.75 mL/min

Detection: UV, 210 nm

| Signal | Retention time | % Area |
|--------|----------------|--------|
| 1      | 14.1           | 50.5   |
| 2      | 22.9           | 49.5   |

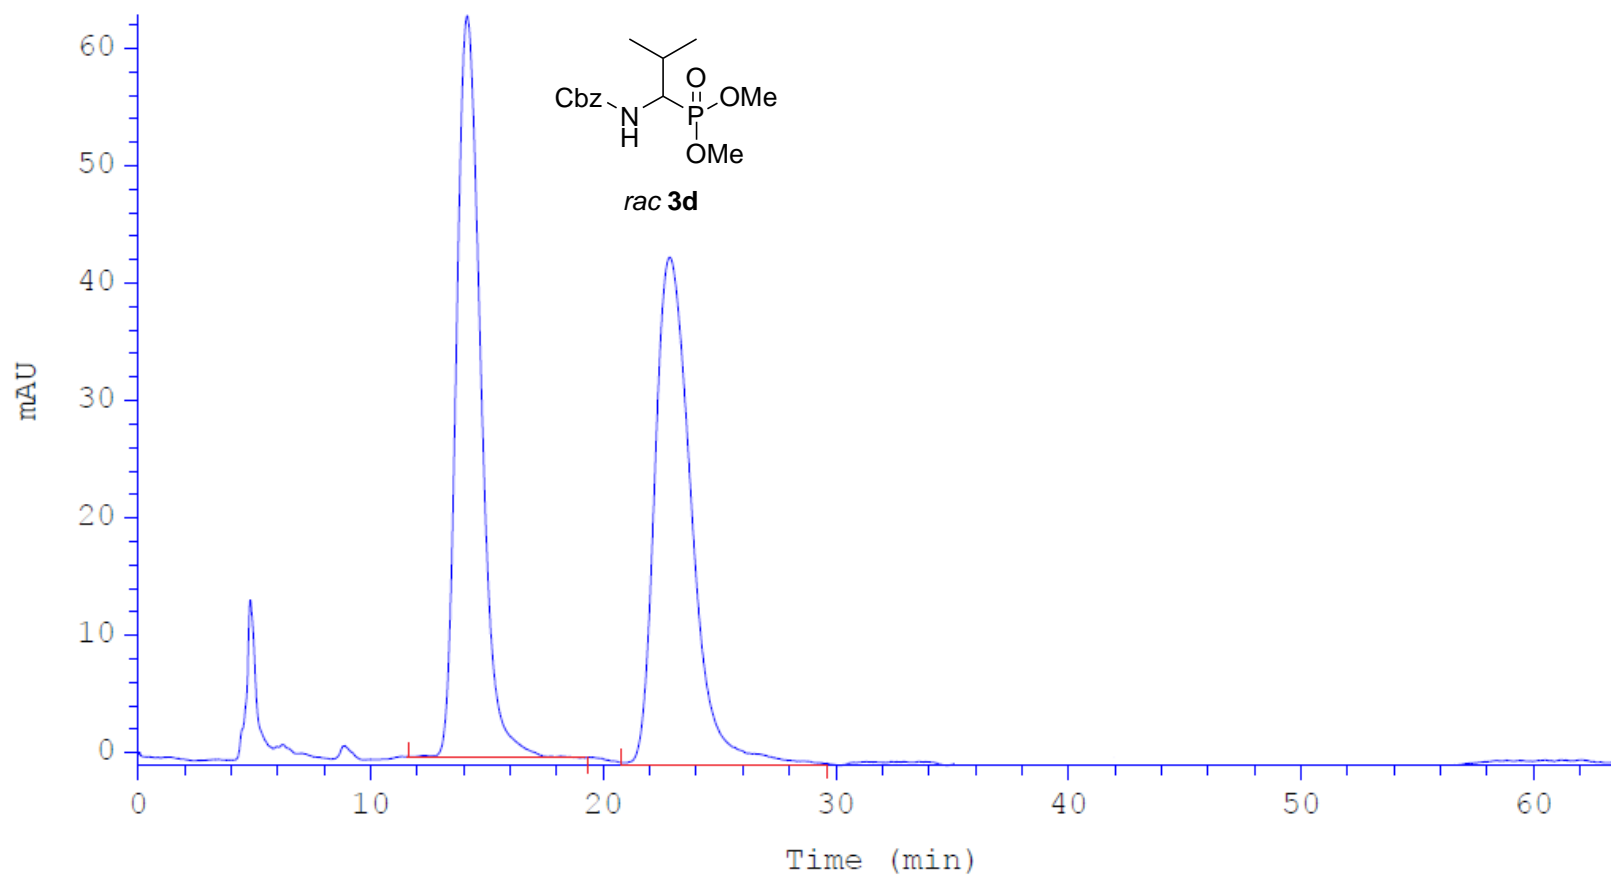

**HPLC conditions:**

Column: Chiralpak AD-H

Eluent: 10% *i*-PrOH/hexane

Flow: 0.75 mL/min

Detection: UV, 210 nm

**HPLC results for the catalyst 4**

| Signal | Retention time | % Area |
|--------|----------------|--------|
| 1      | 14.5           | 77.9   |
| 2      | 23.0           | 22.1   |

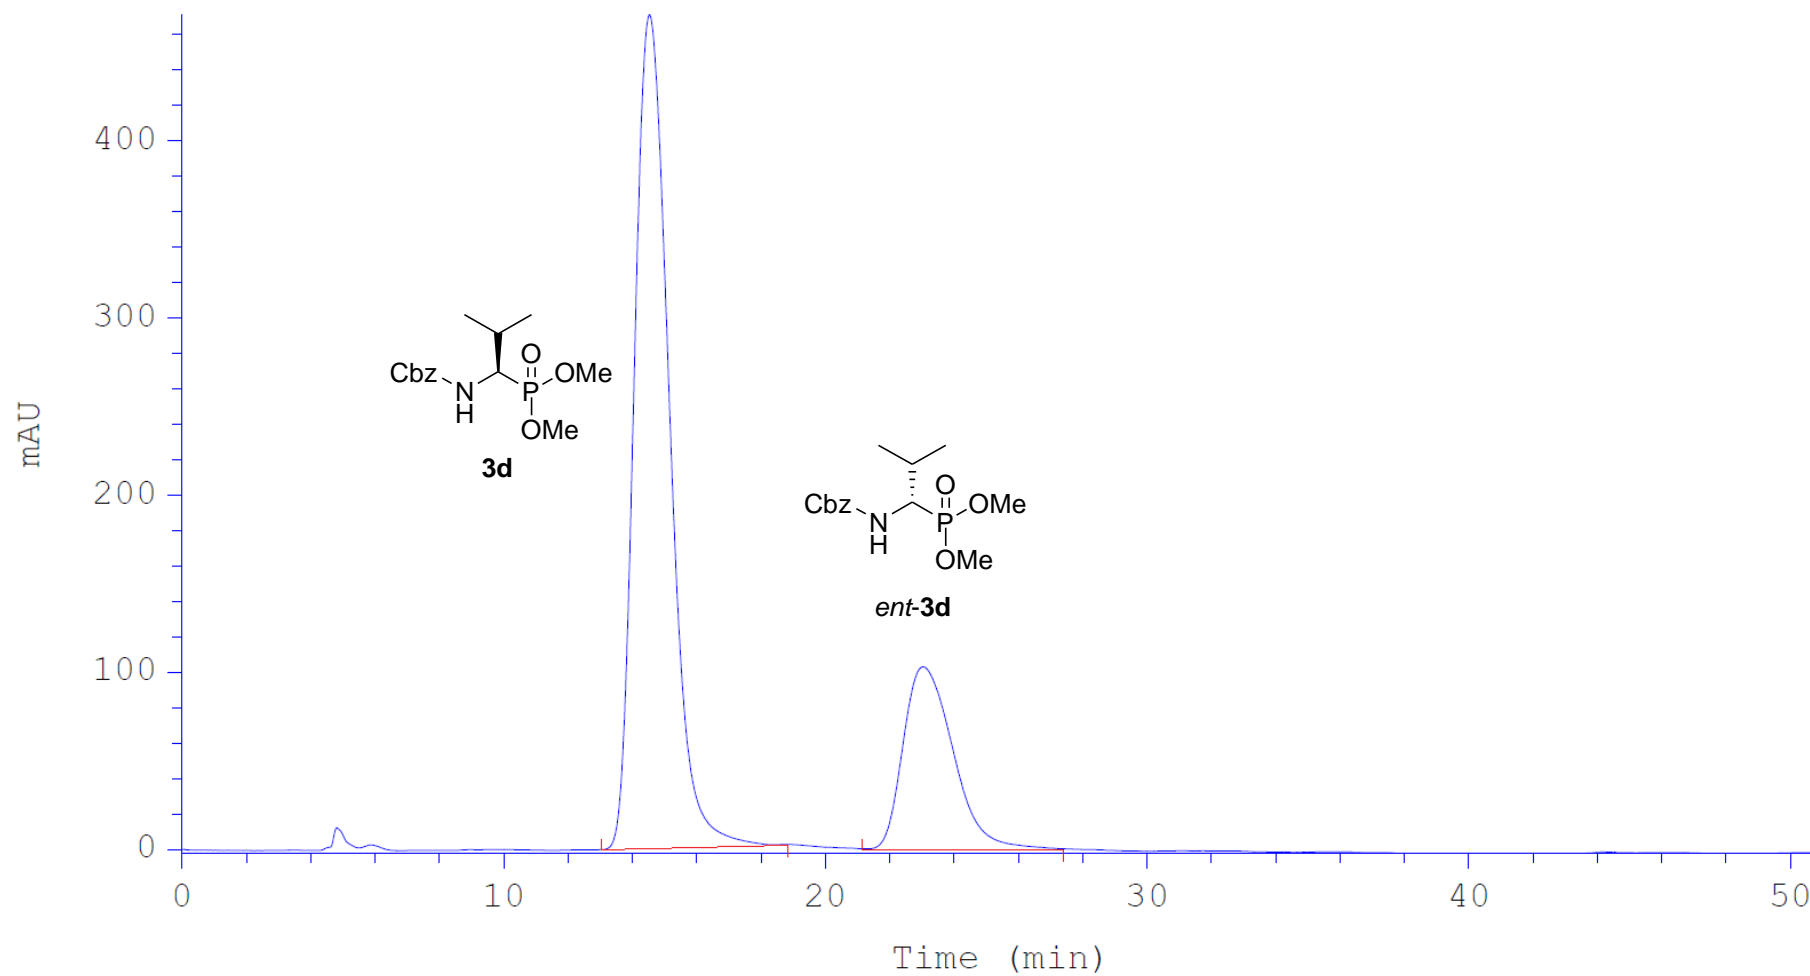

**HPLC conditions:**

Column: Chiralpak IA  
Eluent: 10% *i*-PrOH/hexane  
Flow: 0.75 mL/min  
Detection: UV, 210 nm

| Signal | Retention time | % Area |
|--------|----------------|--------|
| 1      | 13.5           | 48.9   |
| 2      | 19.4           | 51.1   |

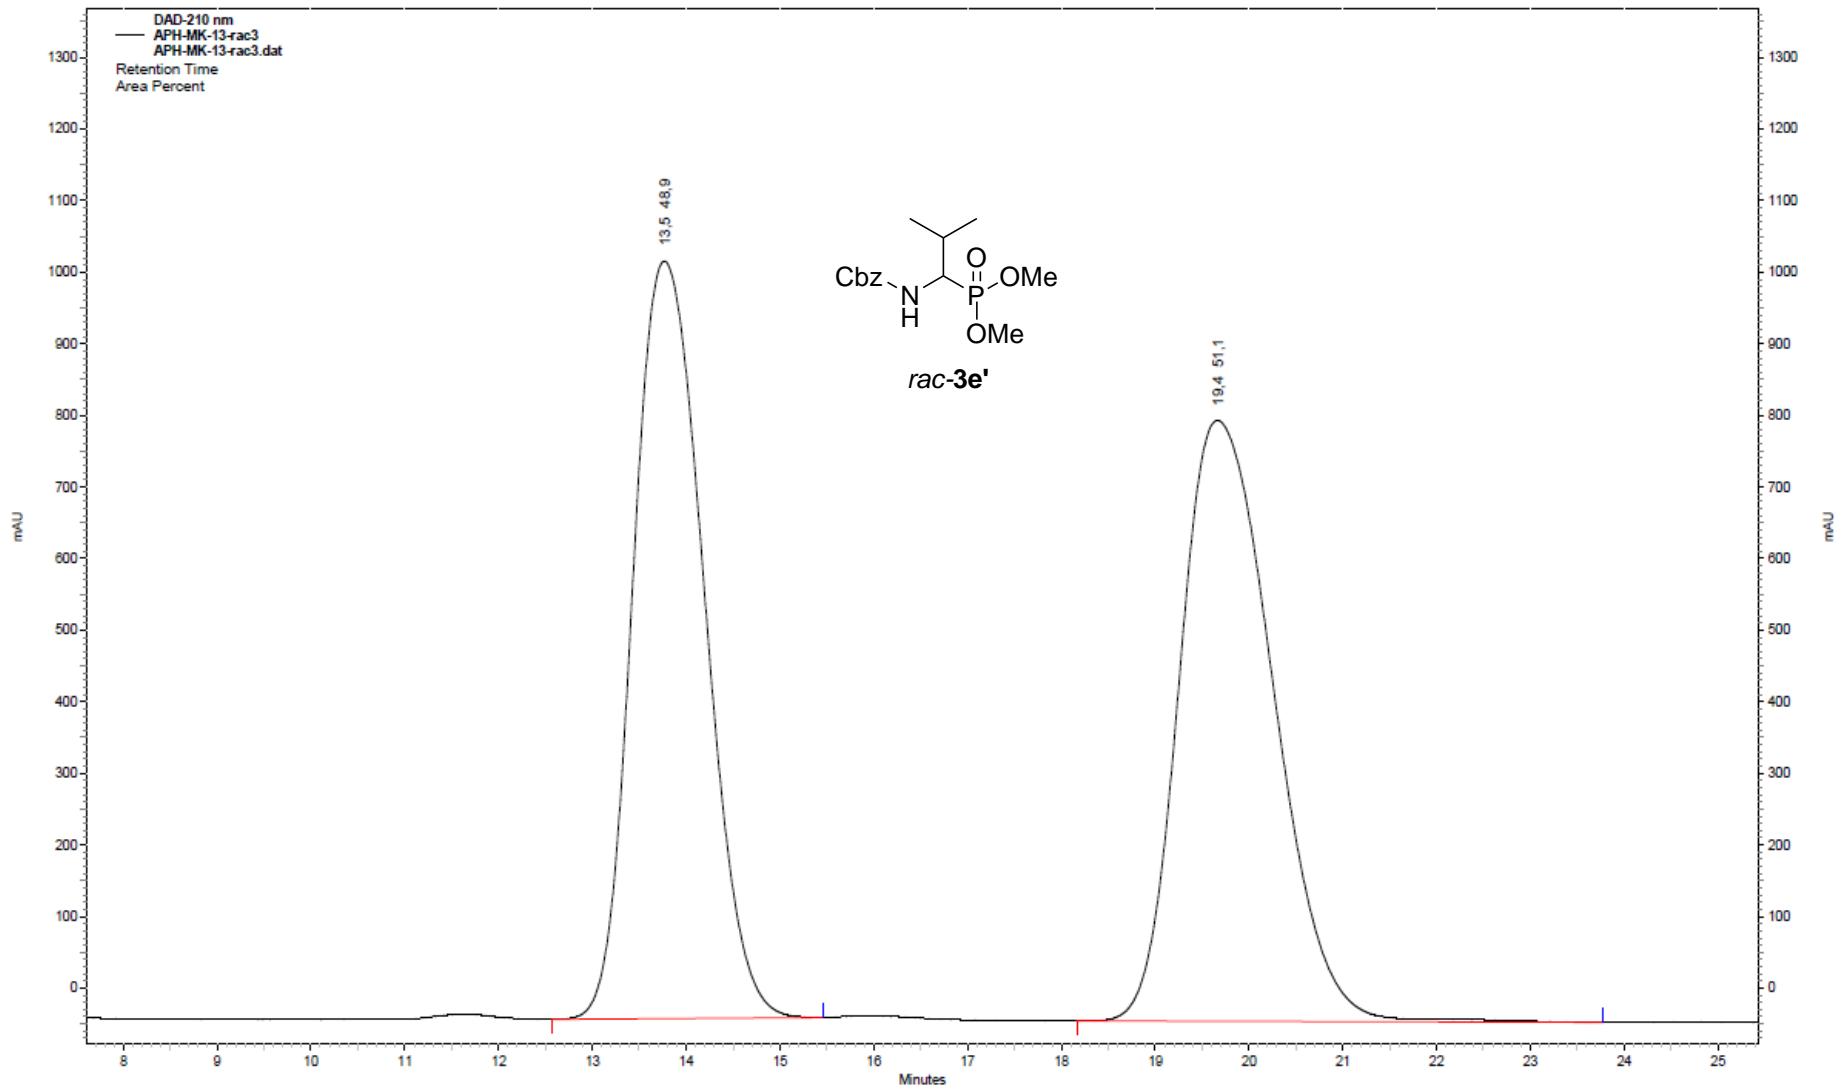

### HPLC conditions:

Column: Chiralpak IA

Eluent: 10% *i*-PrOH/hexane

Flow: 0.75 mL/min

Detection: UV, 210 nm

### HPLC results for the catalyst **4**

| Signal | Retention time | % Area |
|--------|----------------|--------|
| 1      | 13.3           | 61.7   |
| 2      | 19.8           | 38.3   |

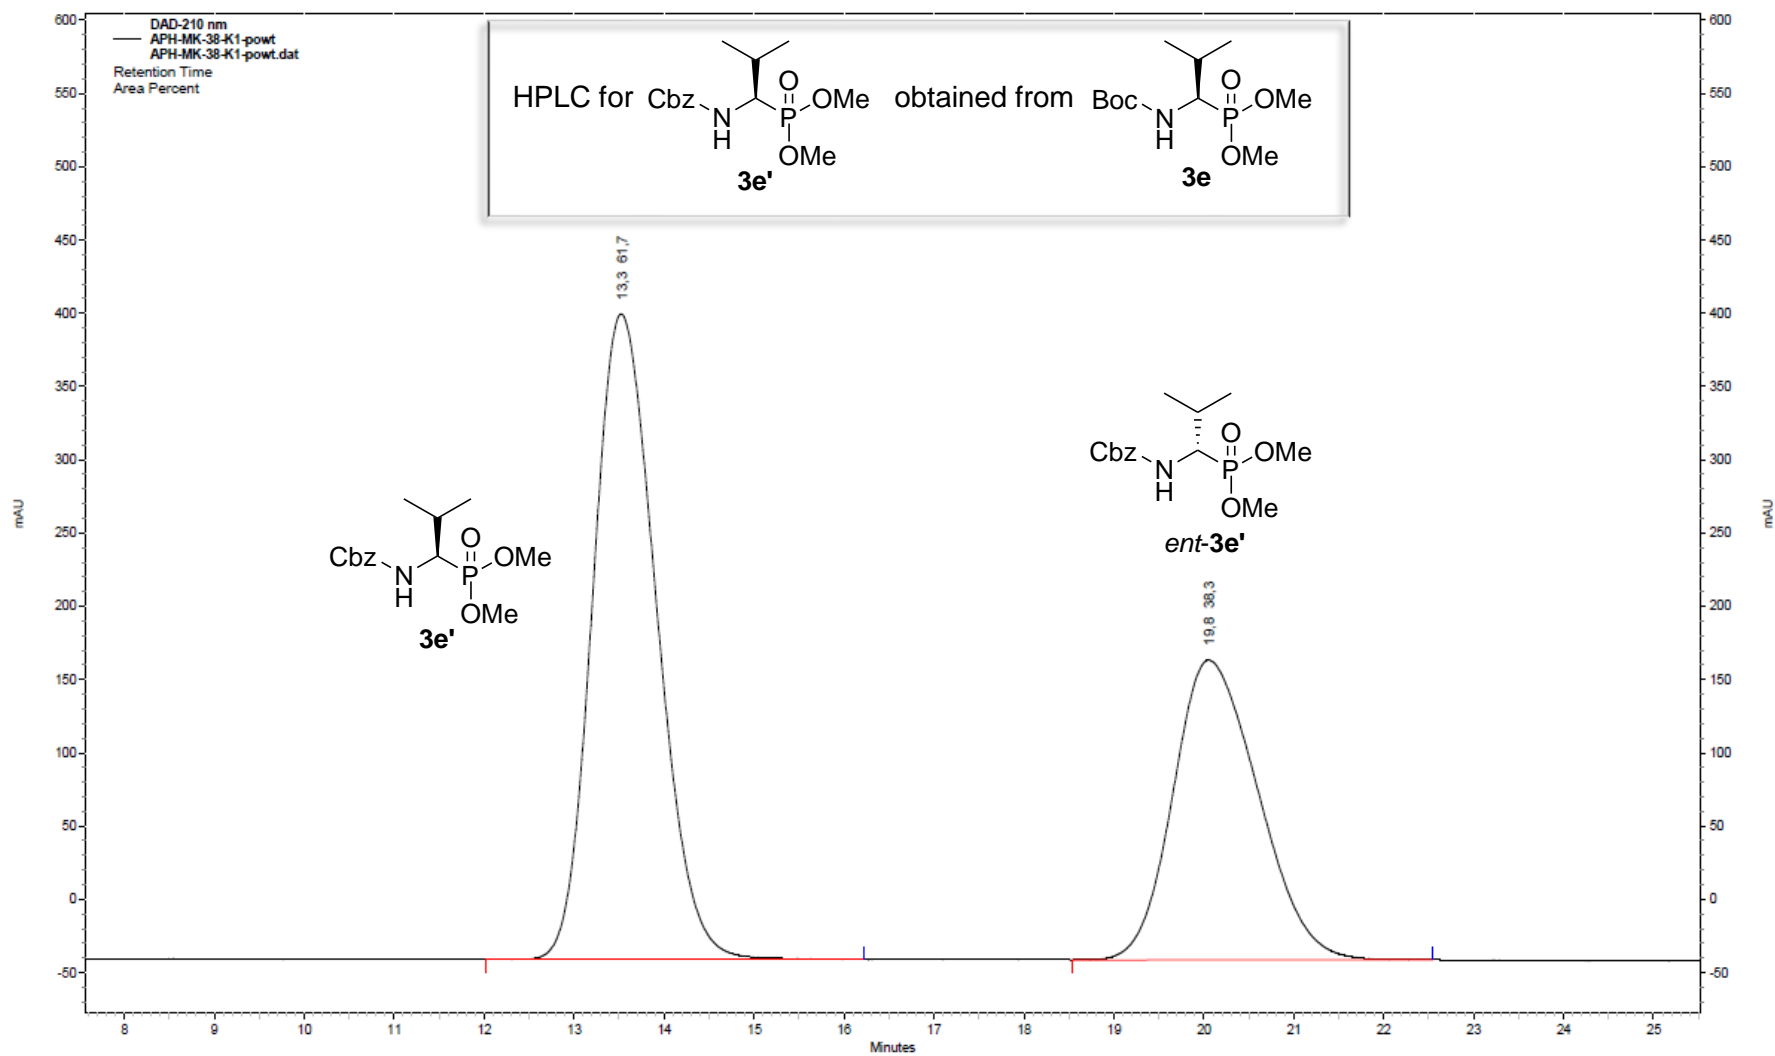

**HPLC conditions:**

Column: Chiralpak IA

Eluent: 15% *i*-PrOH/hexane

Flow: 0.75mL/min

Detection: UV, 254 nm

| Signal | Retention time | % Area |
|--------|----------------|--------|
| 1      | 10.3           | 48.4   |
| 2      | 13.6           | 51.2   |

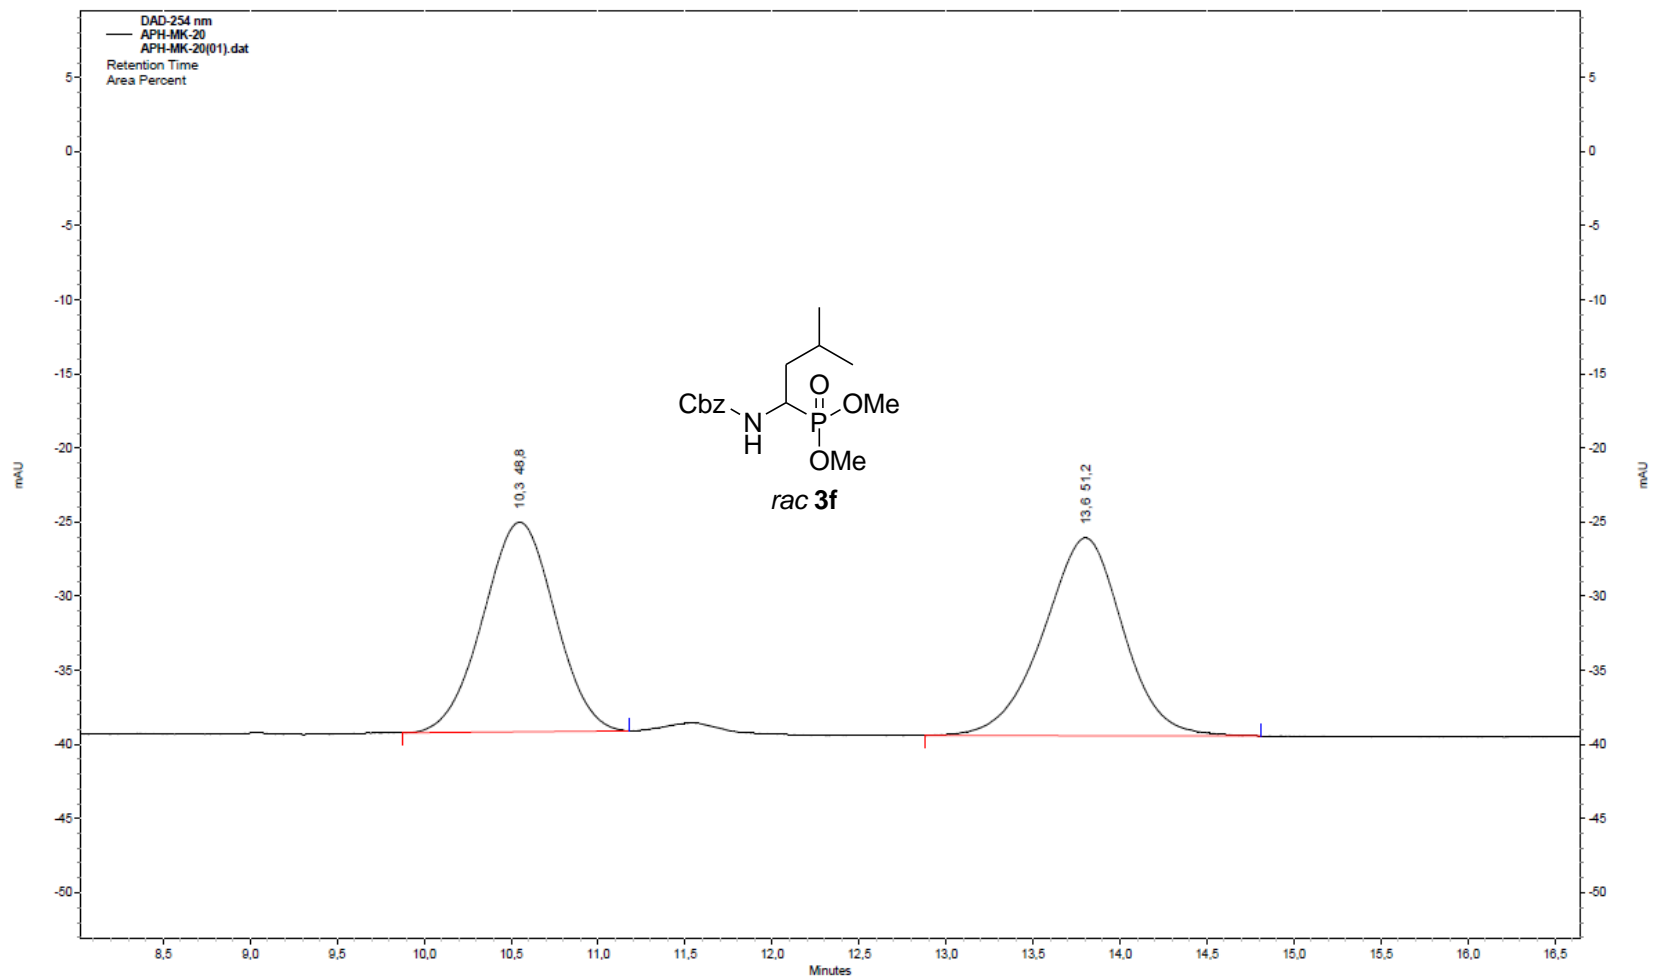

**HPLC conditions:**

Column: Chiralpak IA

Eluent: 15% *i*-PrOH/hexane

Flow: 0.75mL/min

Detection: UV, 254 nm

| HPLC results for the catalyst <b>4</b> |                |        |
|----------------------------------------|----------------|--------|
| Signal                                 | Retention time | % Area |
| 1                                      | 10.1           | 90.1   |
| 2                                      | 13.4           | 9.9    |

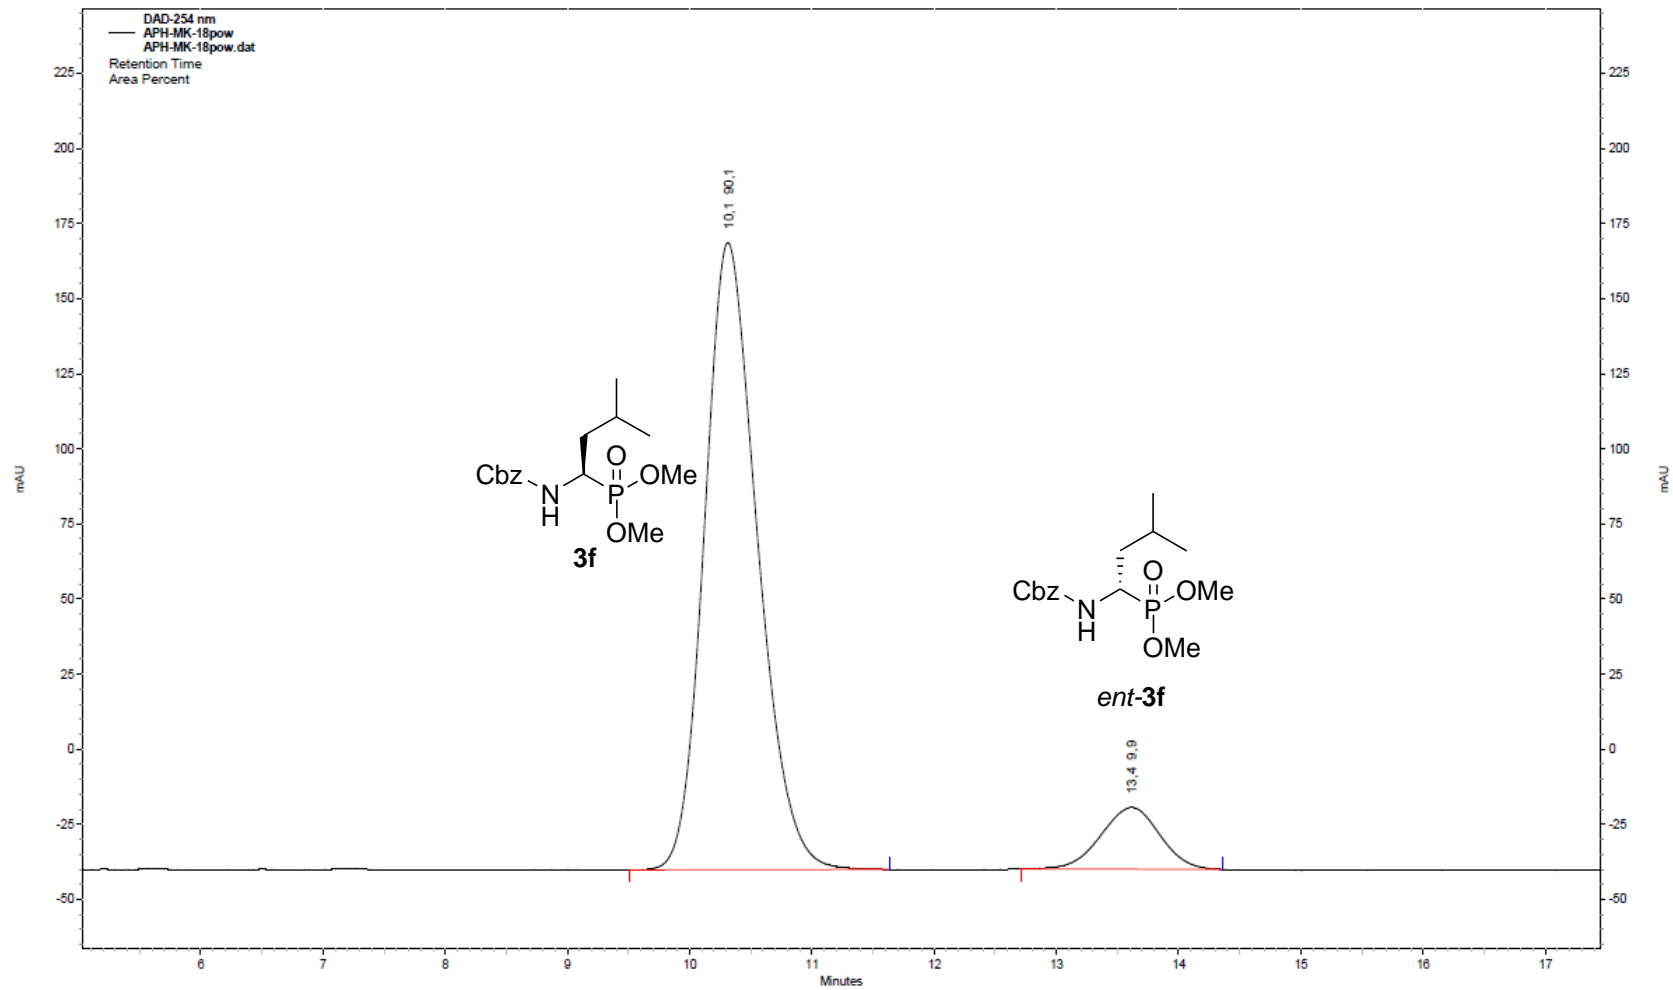



**HPLC conditions:**

Column: Chiralpak IA

Eluent: 15% *i*-PrOH/hexane

Flow: 0.75mL/min

Detection: UV, 254 nm

| HPLC results for the catalyst <b>5</b> |                |        |
|----------------------------------------|----------------|--------|
| Signal                                 | Retention time | % Area |
| 1                                      | 10.3           | 89.4   |
| 2                                      | 13.6           | 10.6   |

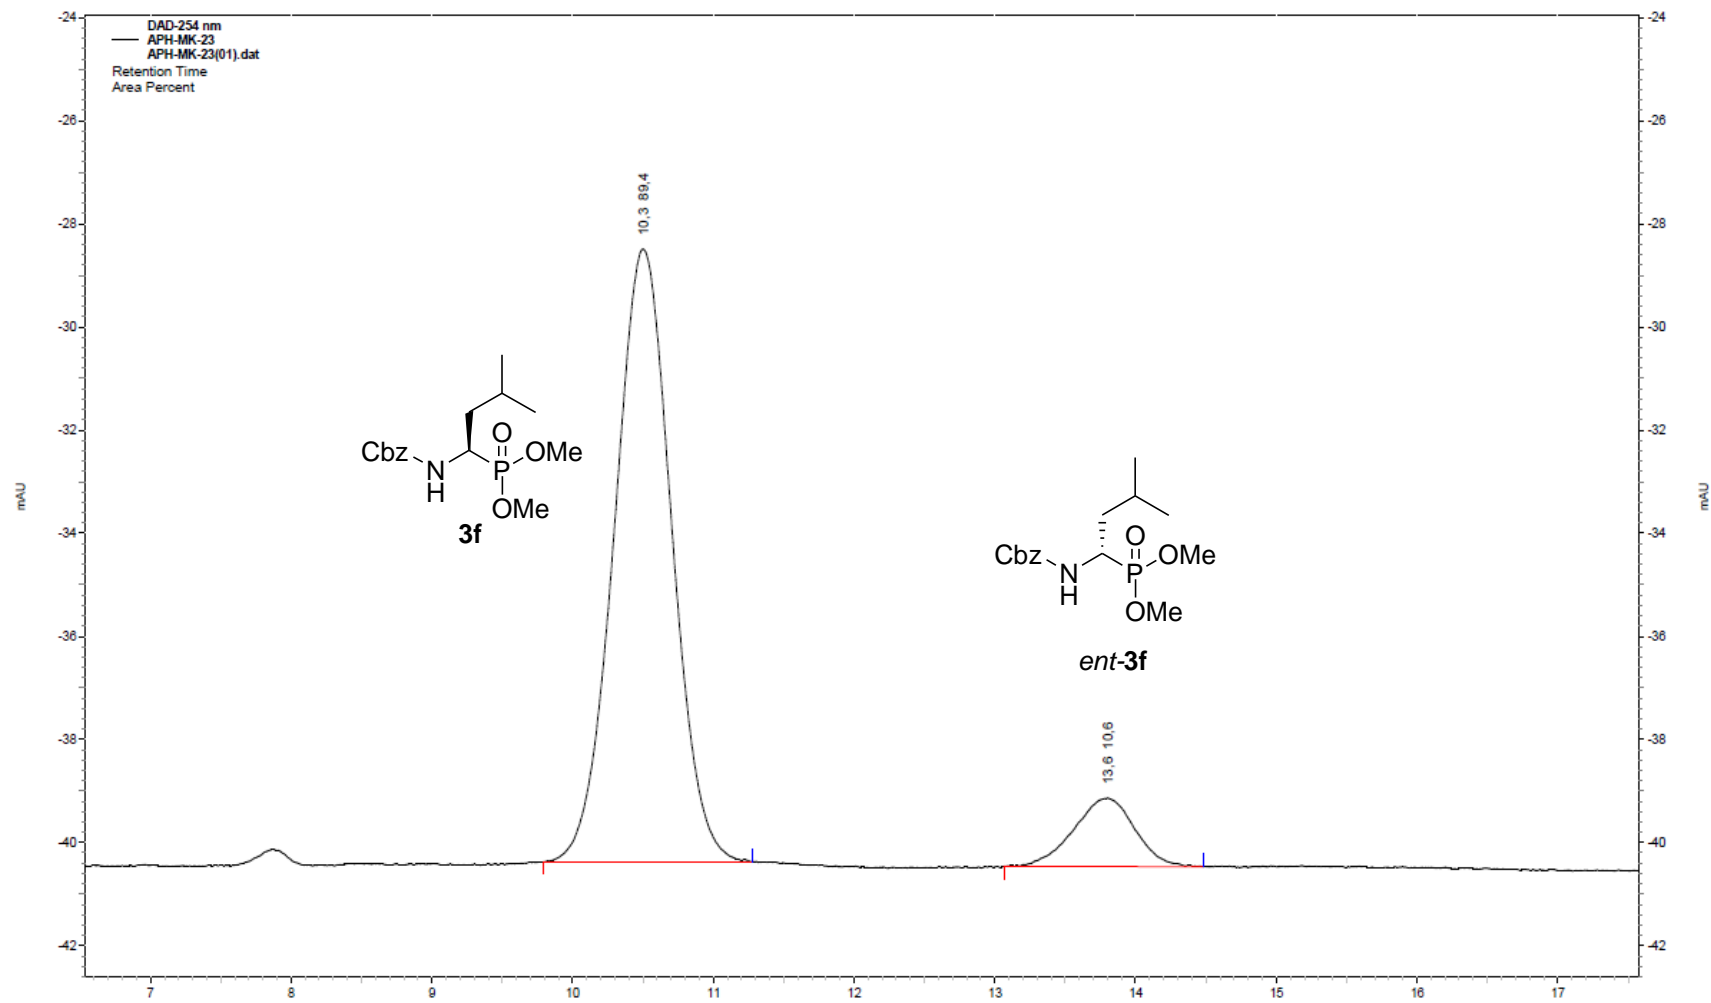

**HPLC conditions:**

Column: Chiralpak AD-H

Eluent: 10% *i*-PrOH/hexane

Flow: 0.75mL/min

Detection: UV, 210 nm

| Signal | Retention time | % Area |
|--------|----------------|--------|
| 1      | 17.3           | 49.6   |
| 2      | 23.8           | 50.4   |

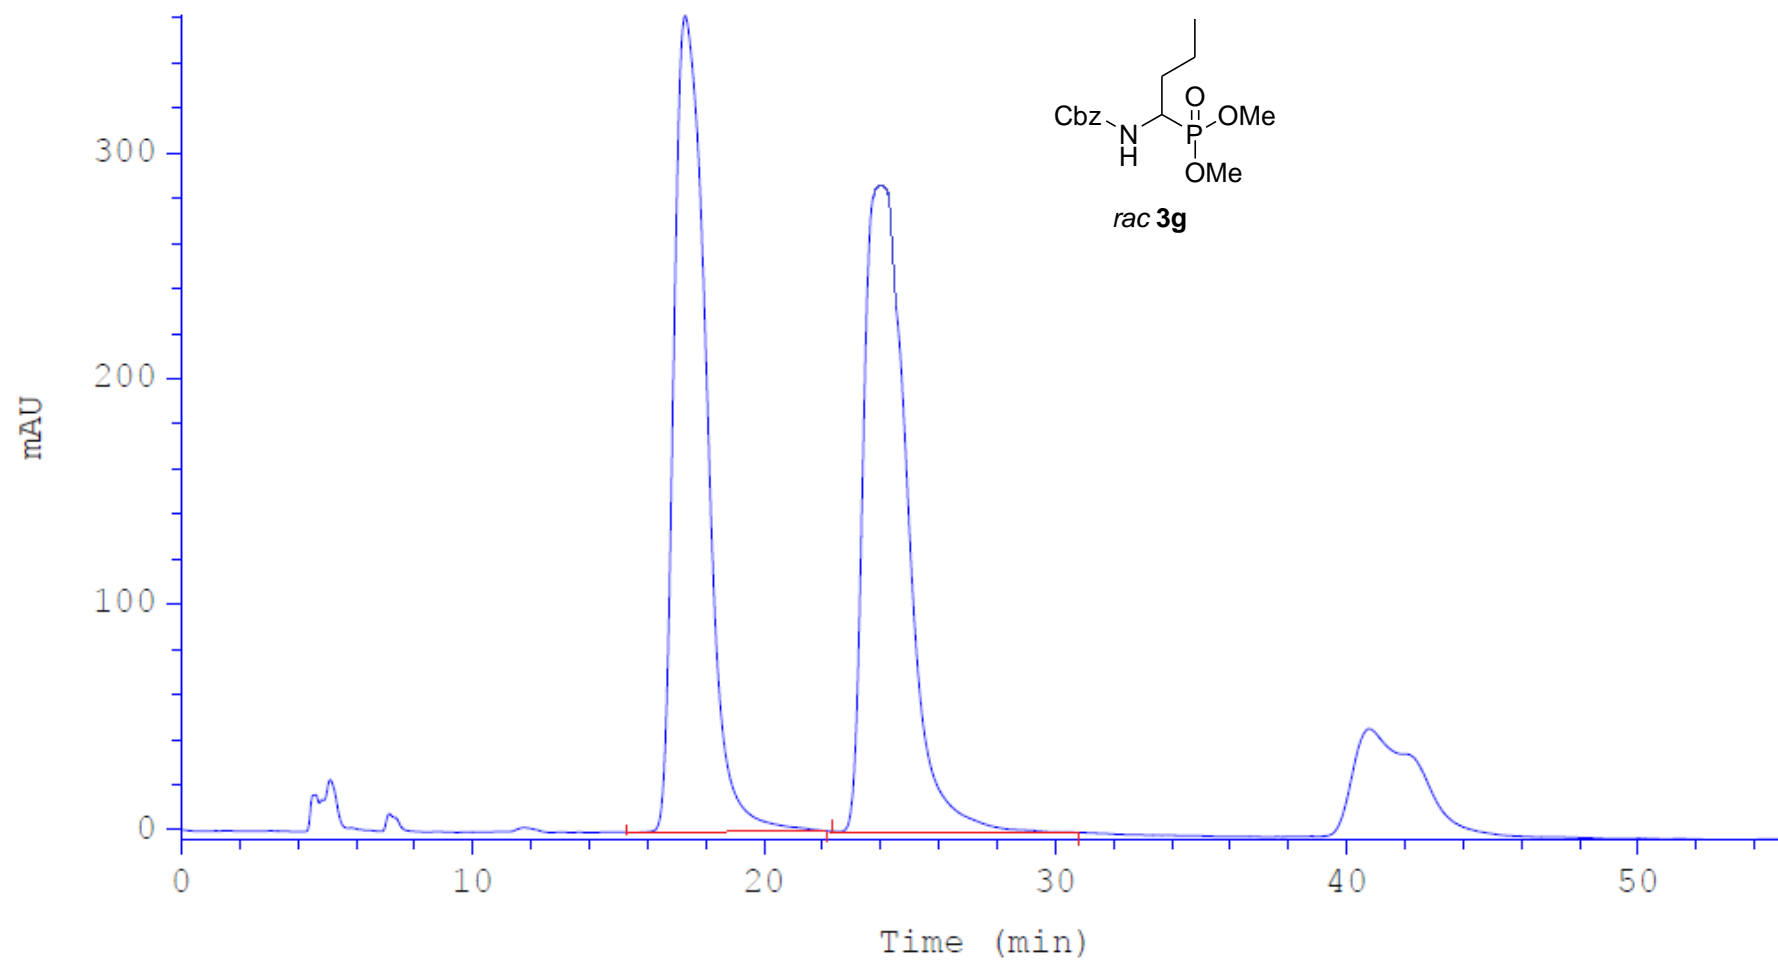

**HPLC conditions:**

Column: Chiralpak AD-H

Eluent: 10% *i*-PrOH/hexane

Flow: 0.75mL/min

Detection: UV, 210 nm

| HPLC results for the catalyst <b>4</b> |                |        |
|----------------------------------------|----------------|--------|
| Signal                                 | Retention time | % Area |
| 1                                      | 18.1           | 89.8   |
| 2                                      | 24.9           | 10.2   |

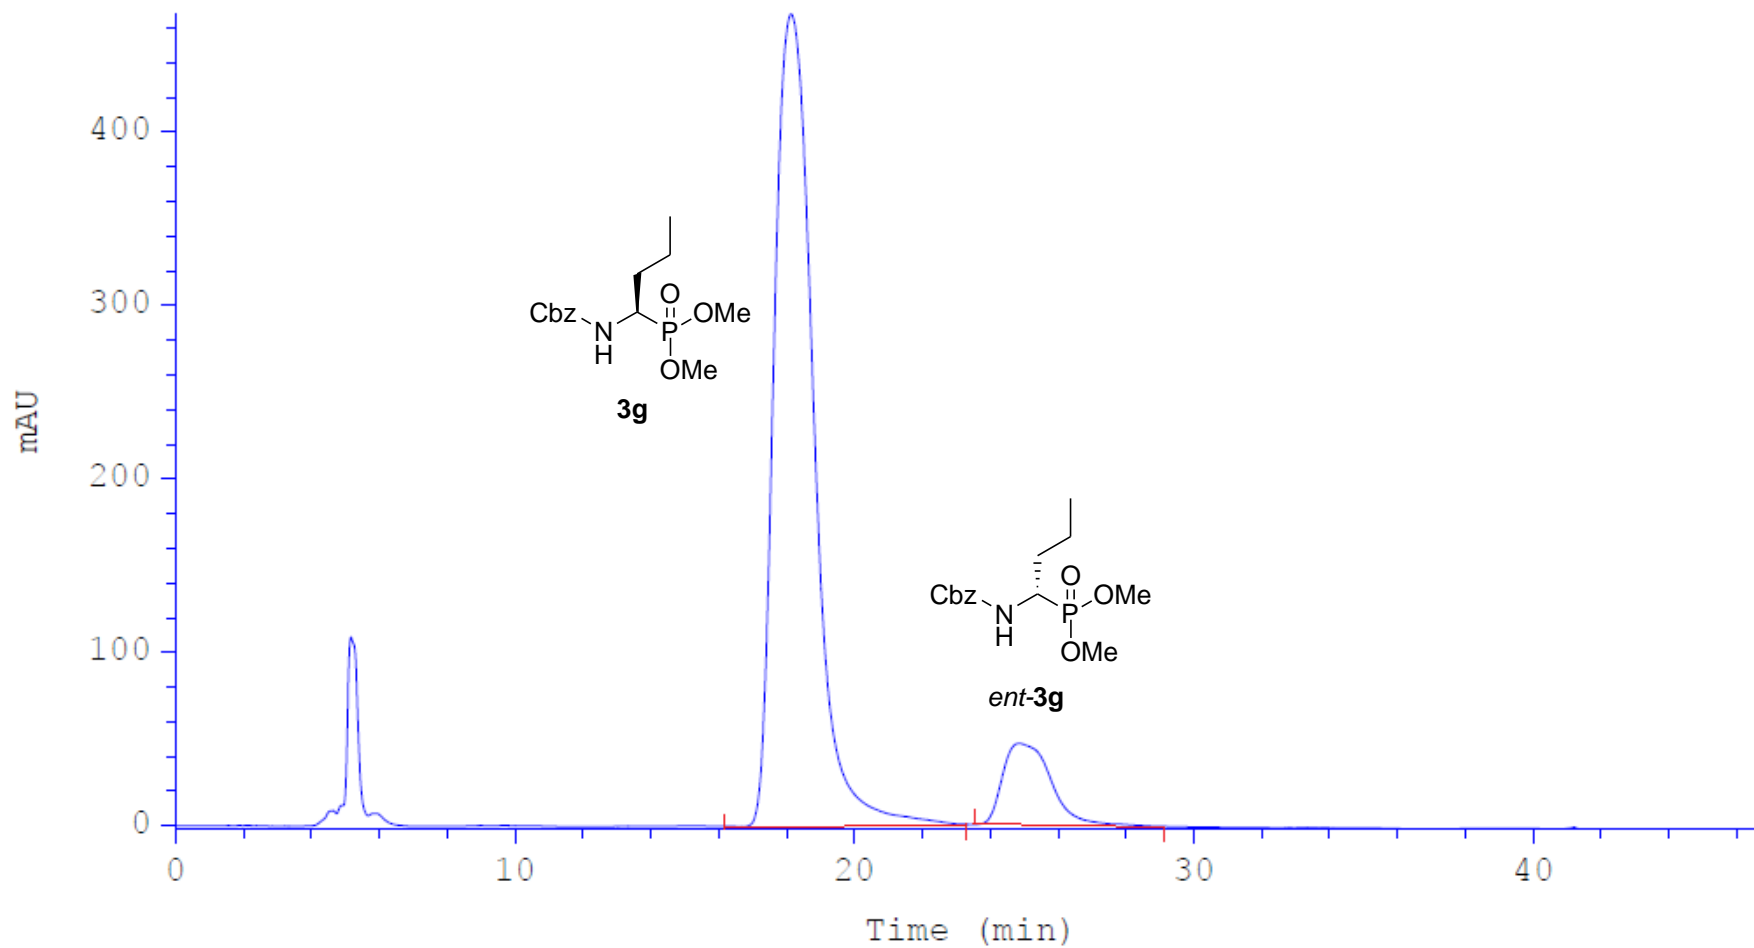

**HPLC conditions:**

Column: Chiralpak AD-H  
Eluent: 10% *i*-PrOH/hexane  
Flow: 0.75mL/min  
Detection: UV, 210 nm

| Signal | Retention time | % Area |
|--------|----------------|--------|
| 1      | 15.3           | 47.7   |
| 2      | 22.7           | 52.3   |

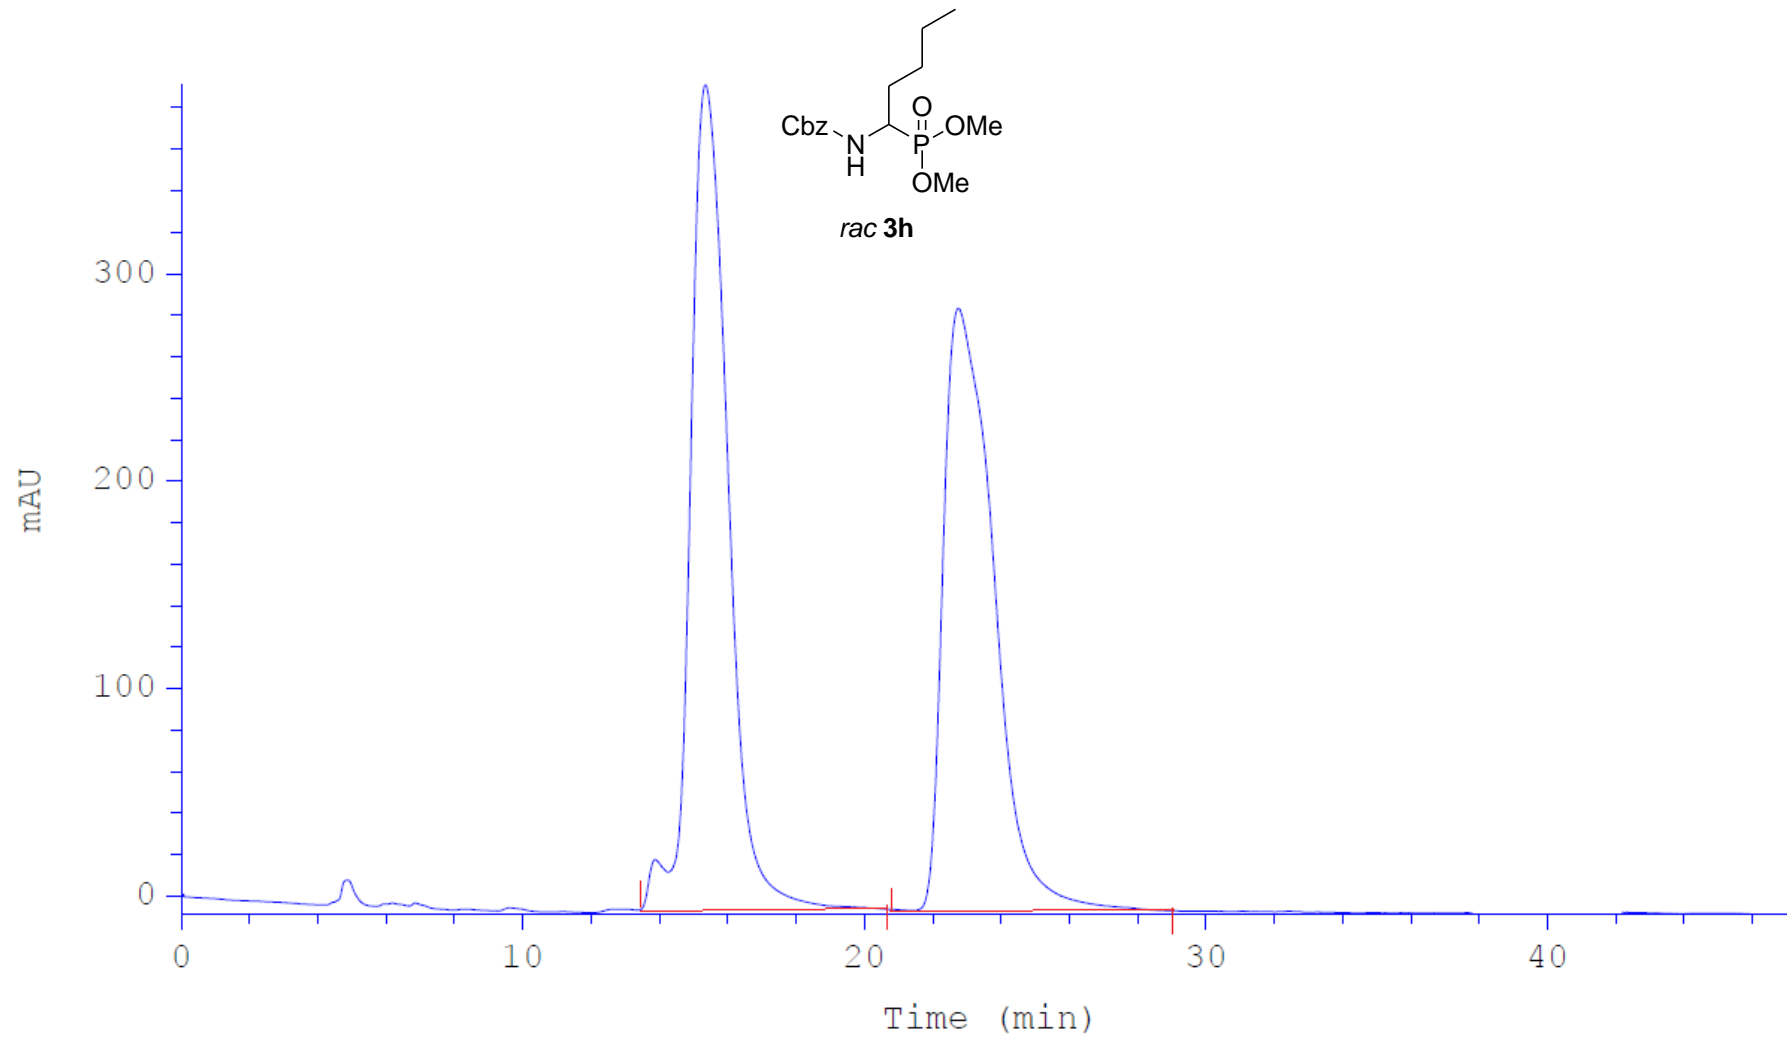

**HPLC conditions:**

Column: Chiralpak AD-H  
Eluent: 10% *i*-PrOH/hexane  
Flow: 0.75mL/min  
Detection: UV, 210 nm

| HPLC results for the catalyst <b>4</b> |                |        |
|----------------------------------------|----------------|--------|
| Signal                                 | Retention time | % Area |
| 1                                      | 15.7           | 95.9   |
| 2                                      | 23.2           | 4.1    |

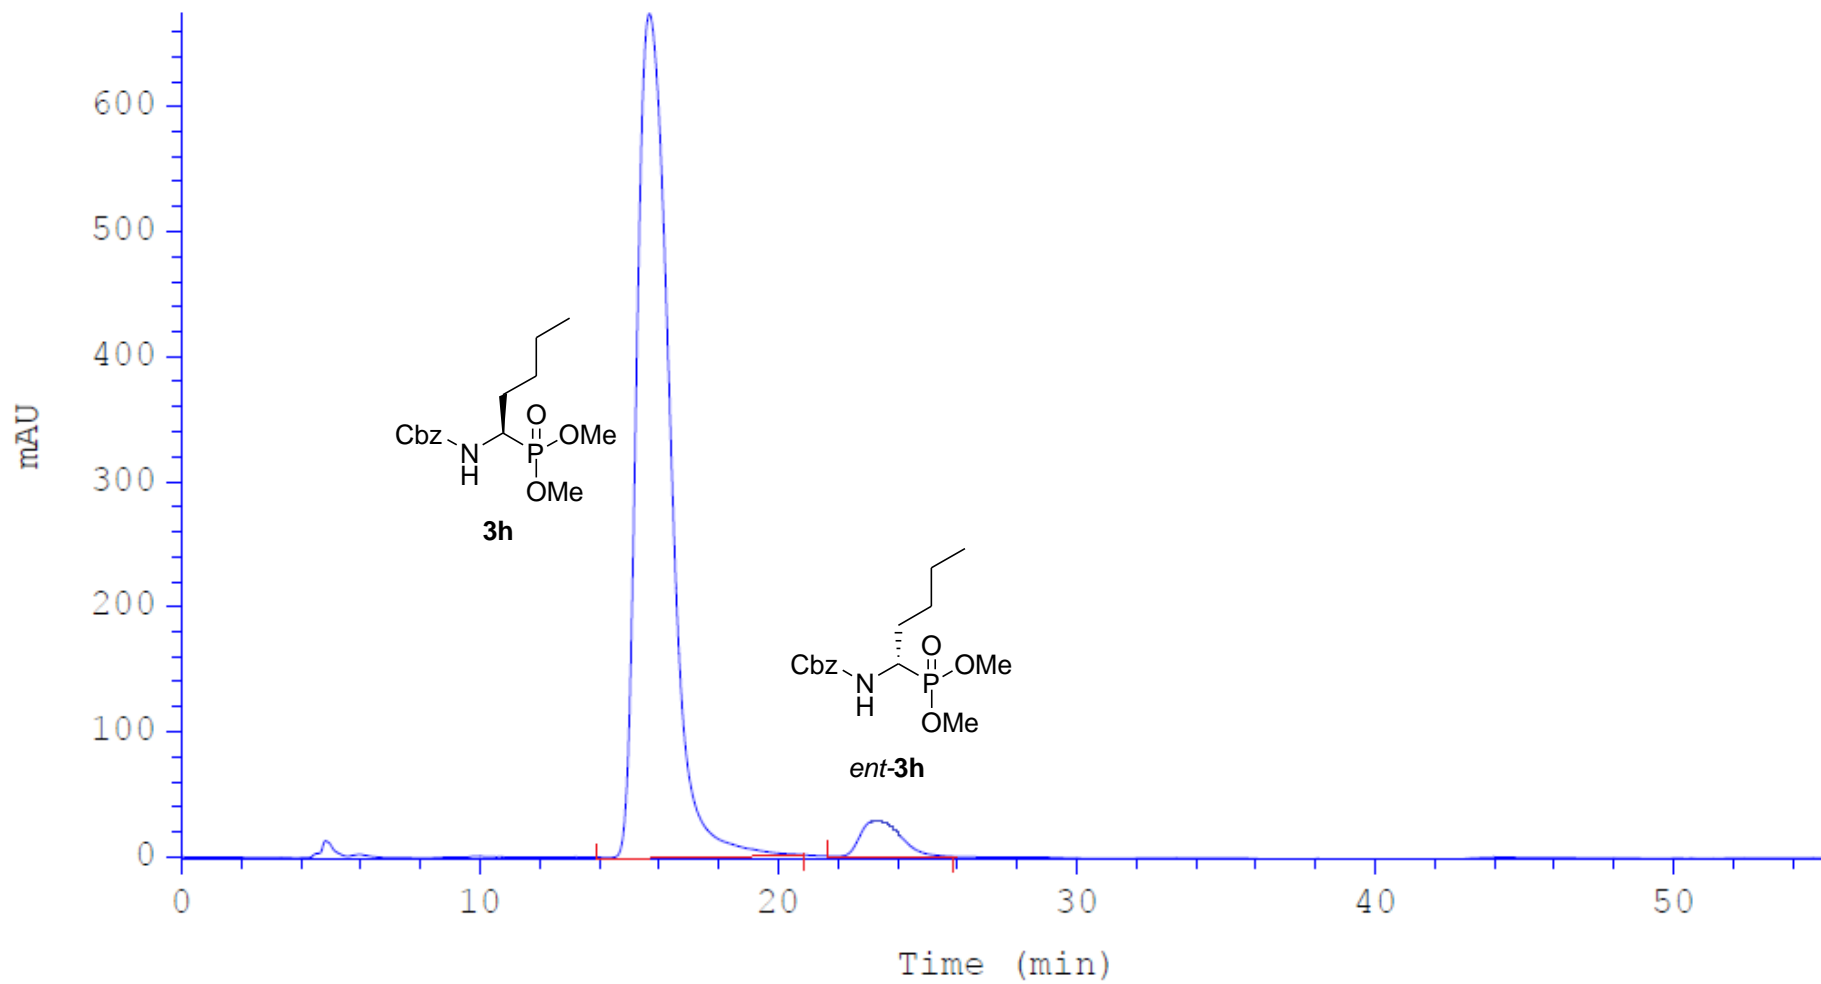

**HPLC conditions:**

Column: Chiralpak IA

Eluent: 15% *i*-PrOH/hexane

Flow: 0.75 mL/min

Detection: UV, 205 nm

| Signal | Retention time | % Area |
|--------|----------------|--------|
| 1      | 15.7           | 49.9   |
| 2      | 21.0           | 50.1   |

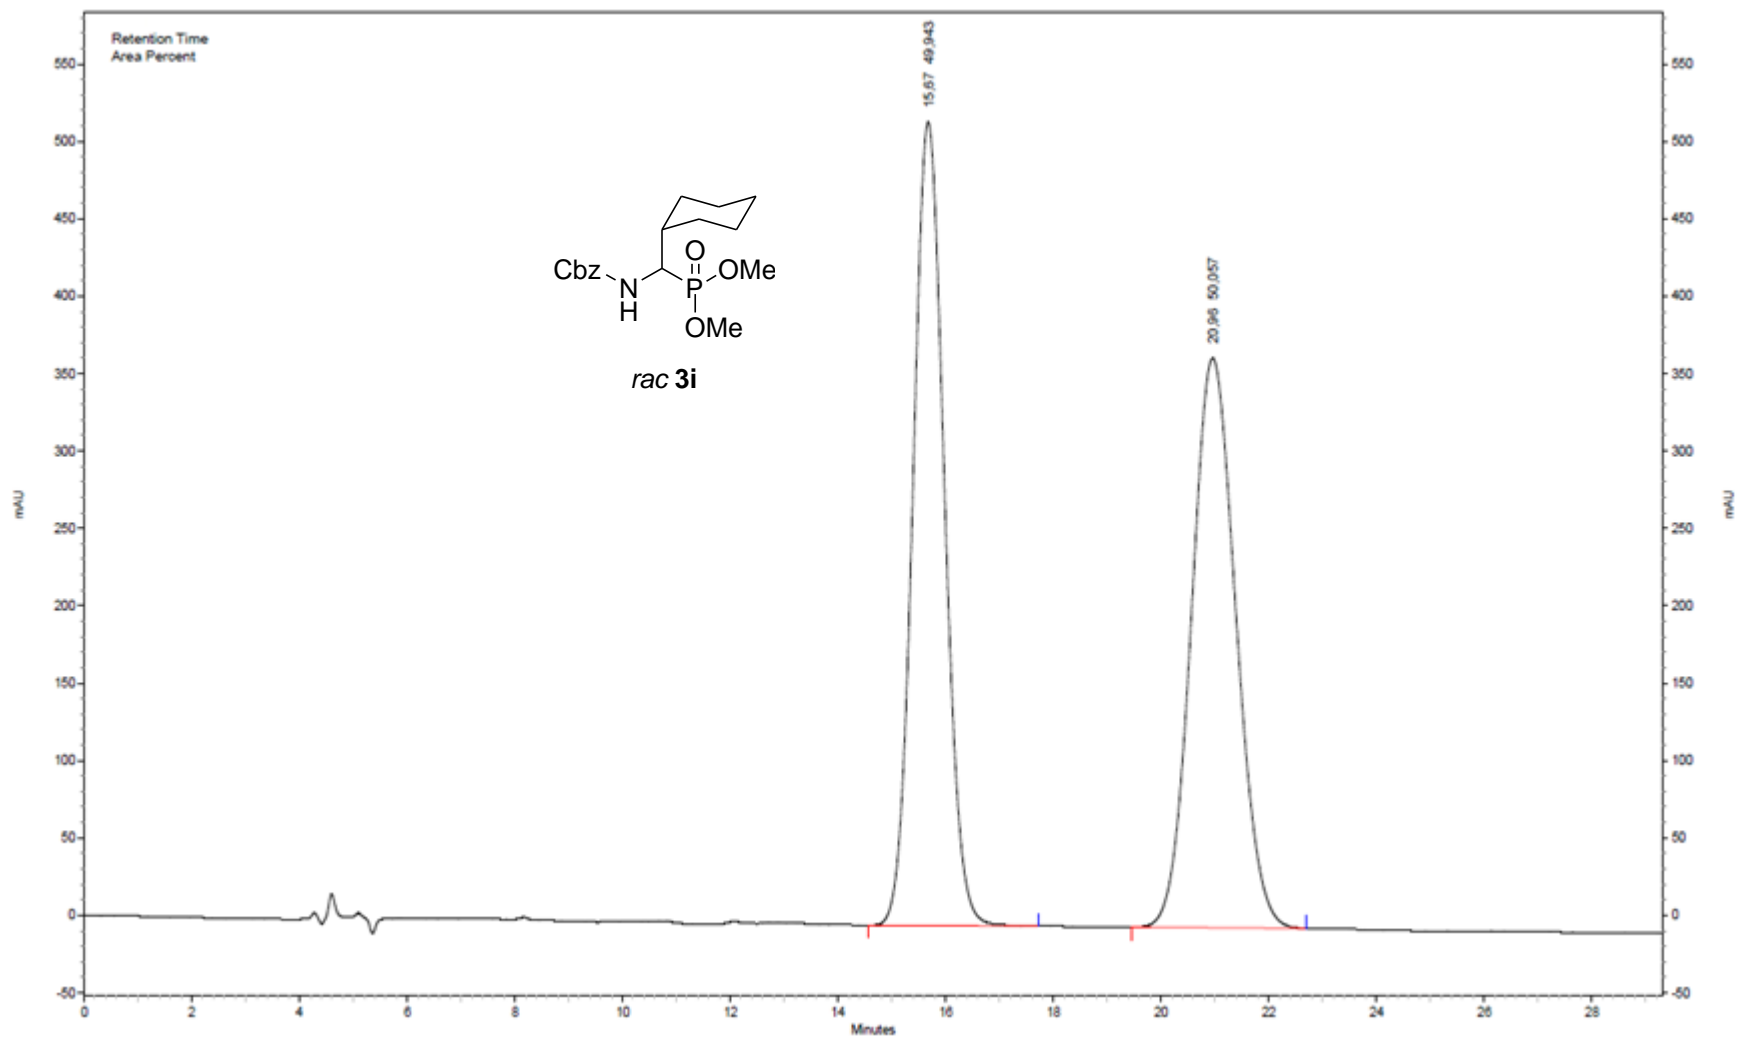

**HPLC conditions:**

Column: Chiralpak IA

Eluent: 15% *i*-PrOH/hexane

Flow: 0.75 mL/min

Detection: UV, 205 nm

**HPLC results for the catalyst 4**

| Signal | Retention time | % Area |
|--------|----------------|--------|
| 1      | 15.6           | 82.5   |
| 2      | 20.9           | 17.5   |

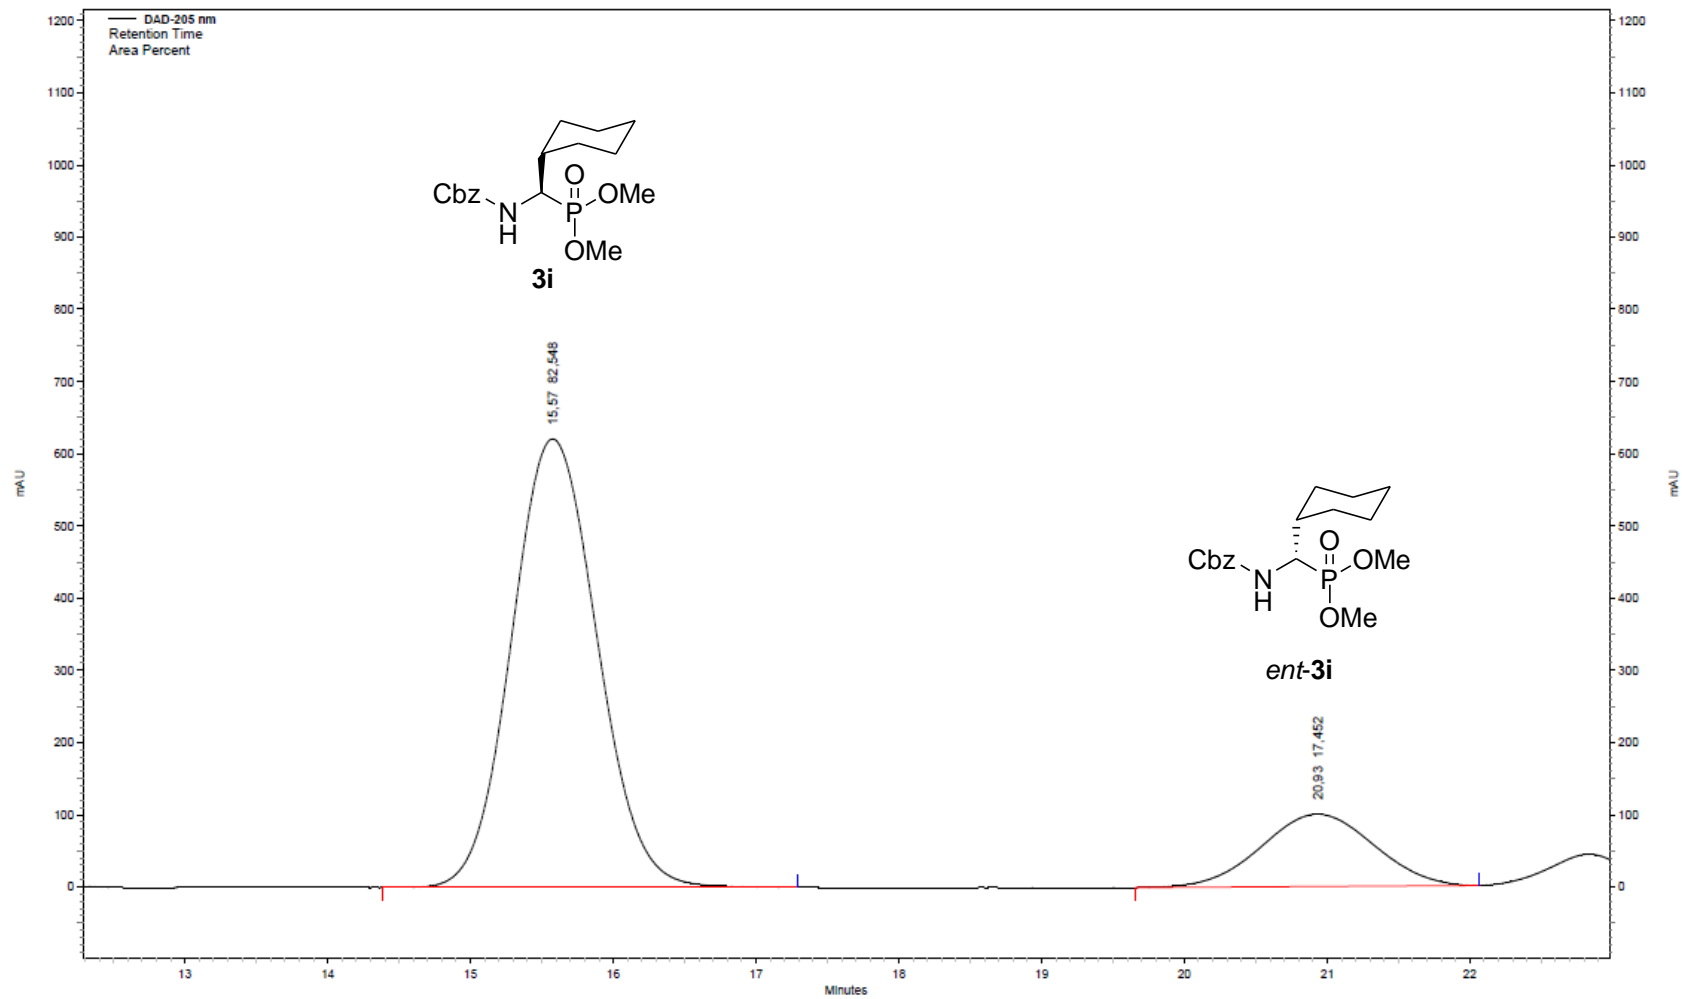

**HPLC conditions:**

Column: Chiralpak IA

Eluent: 15% *i*-PrOH/hexane

Flow: 0.75 mL/min

Detection: UV, 205 nm

HPLC results for the catalyst **5**

| Signal | Retention time | % Area |
|--------|----------------|--------|
| 1      | 15.6           | 77.6   |
| 2      | 21.0           | 22.4   |

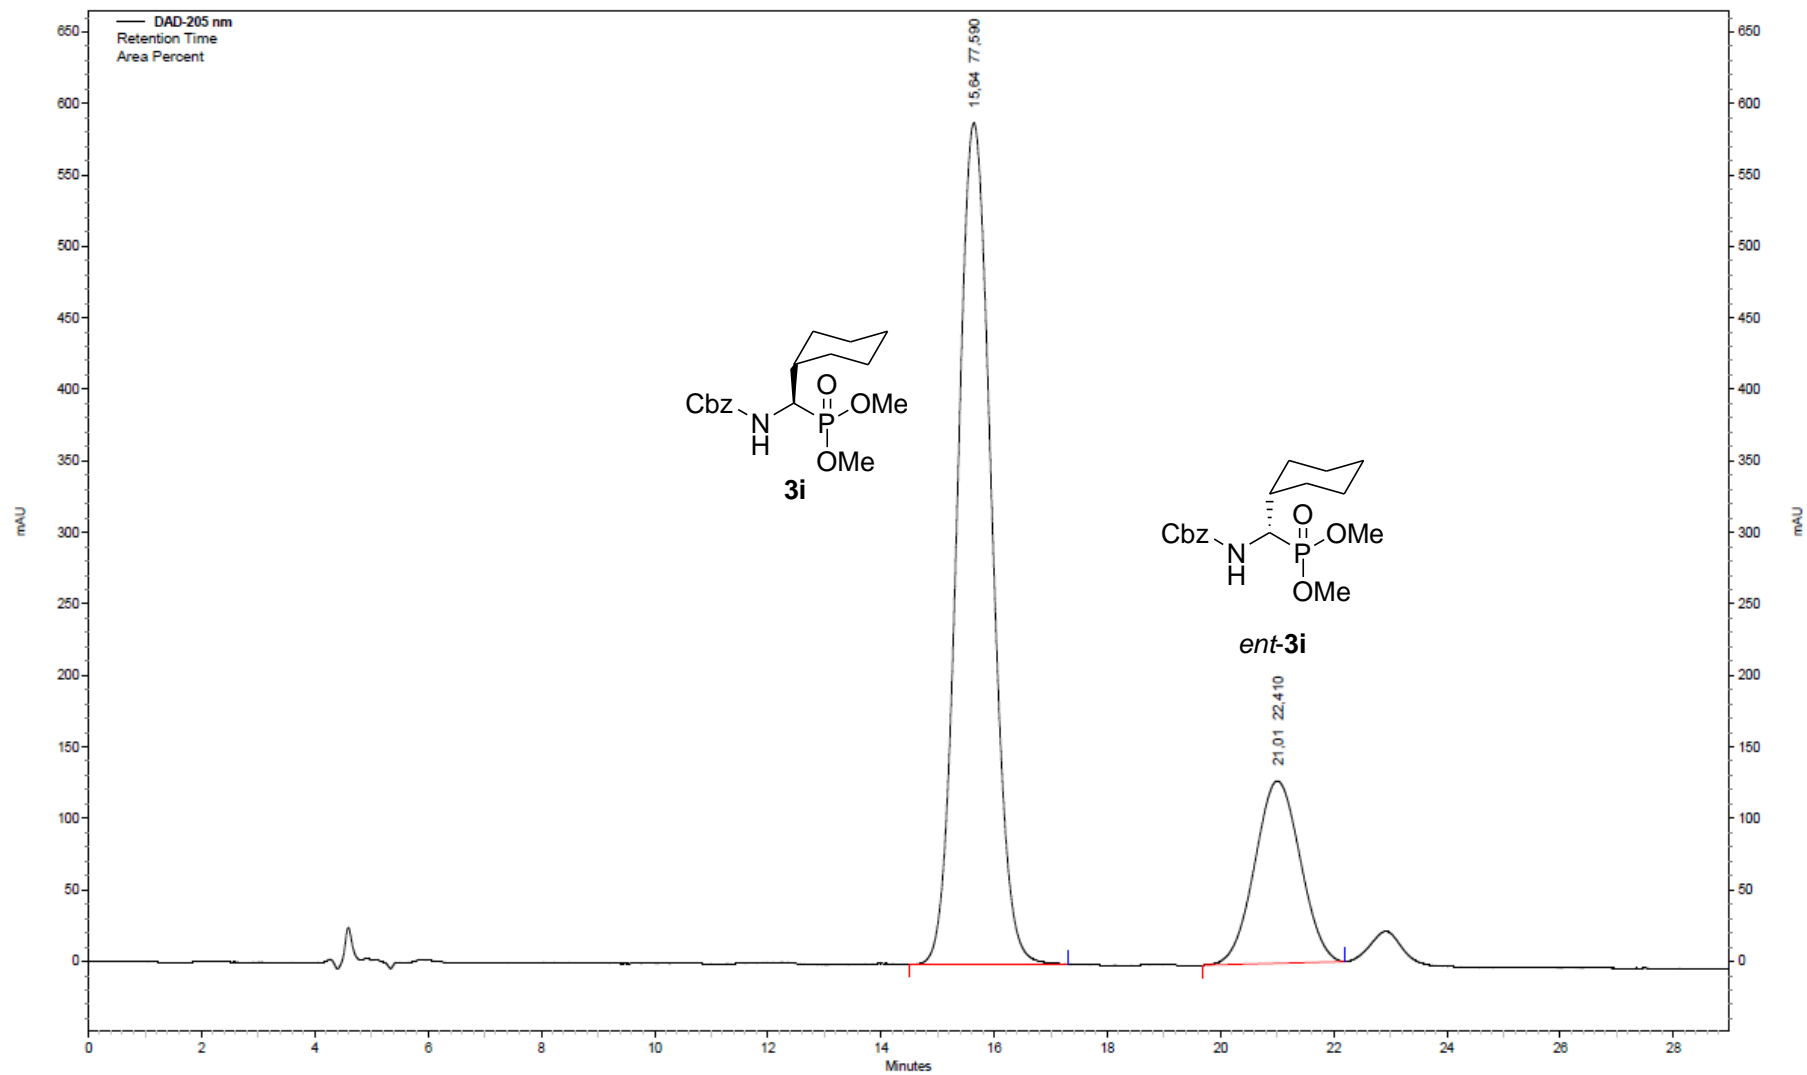



**HPLC conditions:**

Column: Chiralpak AD-H  
Eluent: 10% *i*-PrOH/hexane  
Flow: 0.75 mL/min  
Detection: UV, 210 nm

| Signal | Retention time | % Area |
|--------|----------------|--------|
| 1      | 18.8           | 49.7   |
| 2      | 22.4           | 50.3   |

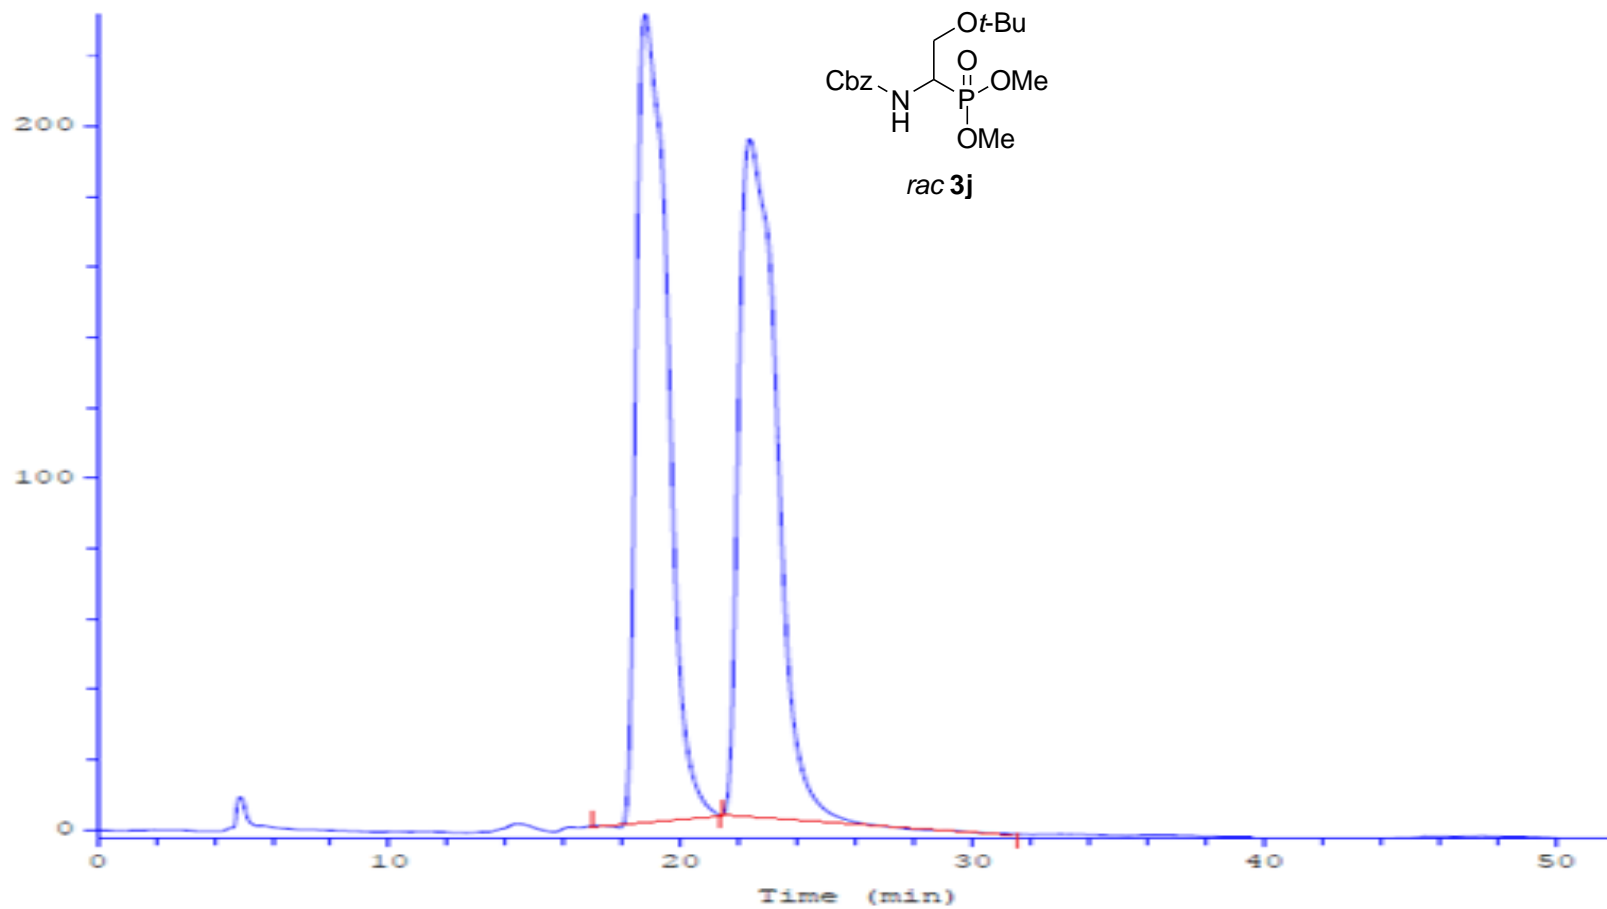

**HPLC conditions:**

Column: Chiralpak AD-H  
Eluent: 10% *i*-PrOH/hexane  
Flow: 0.75 mL/min  
Detection: UV, 210 nm

| HPLC results for the catalyst <b>4</b> |                |        |
|----------------------------------------|----------------|--------|
| Signal                                 | Retention time | % Area |
| 1                                      | 18.8           | 76.3   |
| 2                                      | 22.3           | 23.7   |

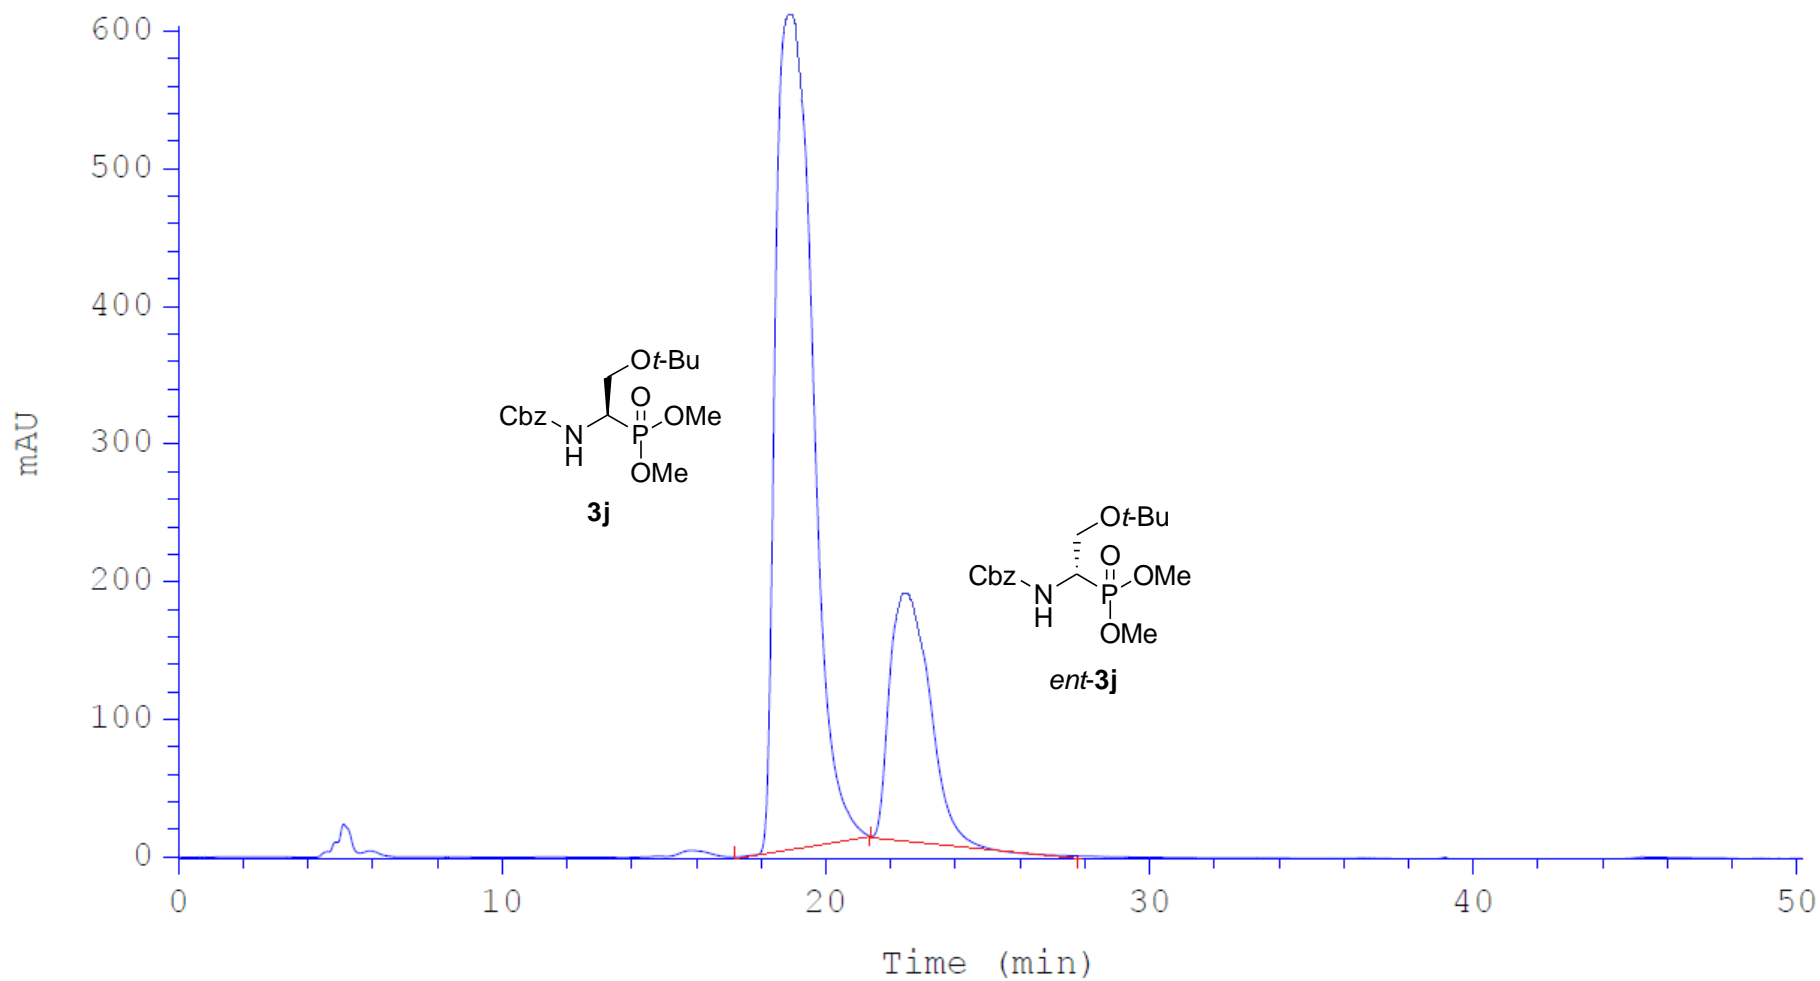

**HPLC conditions:**

Column: Chiralpak IA

Eluent: 10% *i*-PrOH/hexane

Flow: 0.75 mL/min

Detection: UV, 210 nm

| Signal | Retention time | % Area |
|--------|----------------|--------|
| 1      | 21.9           | 49.8   |
| 2      | 25.5           | 50.2   |

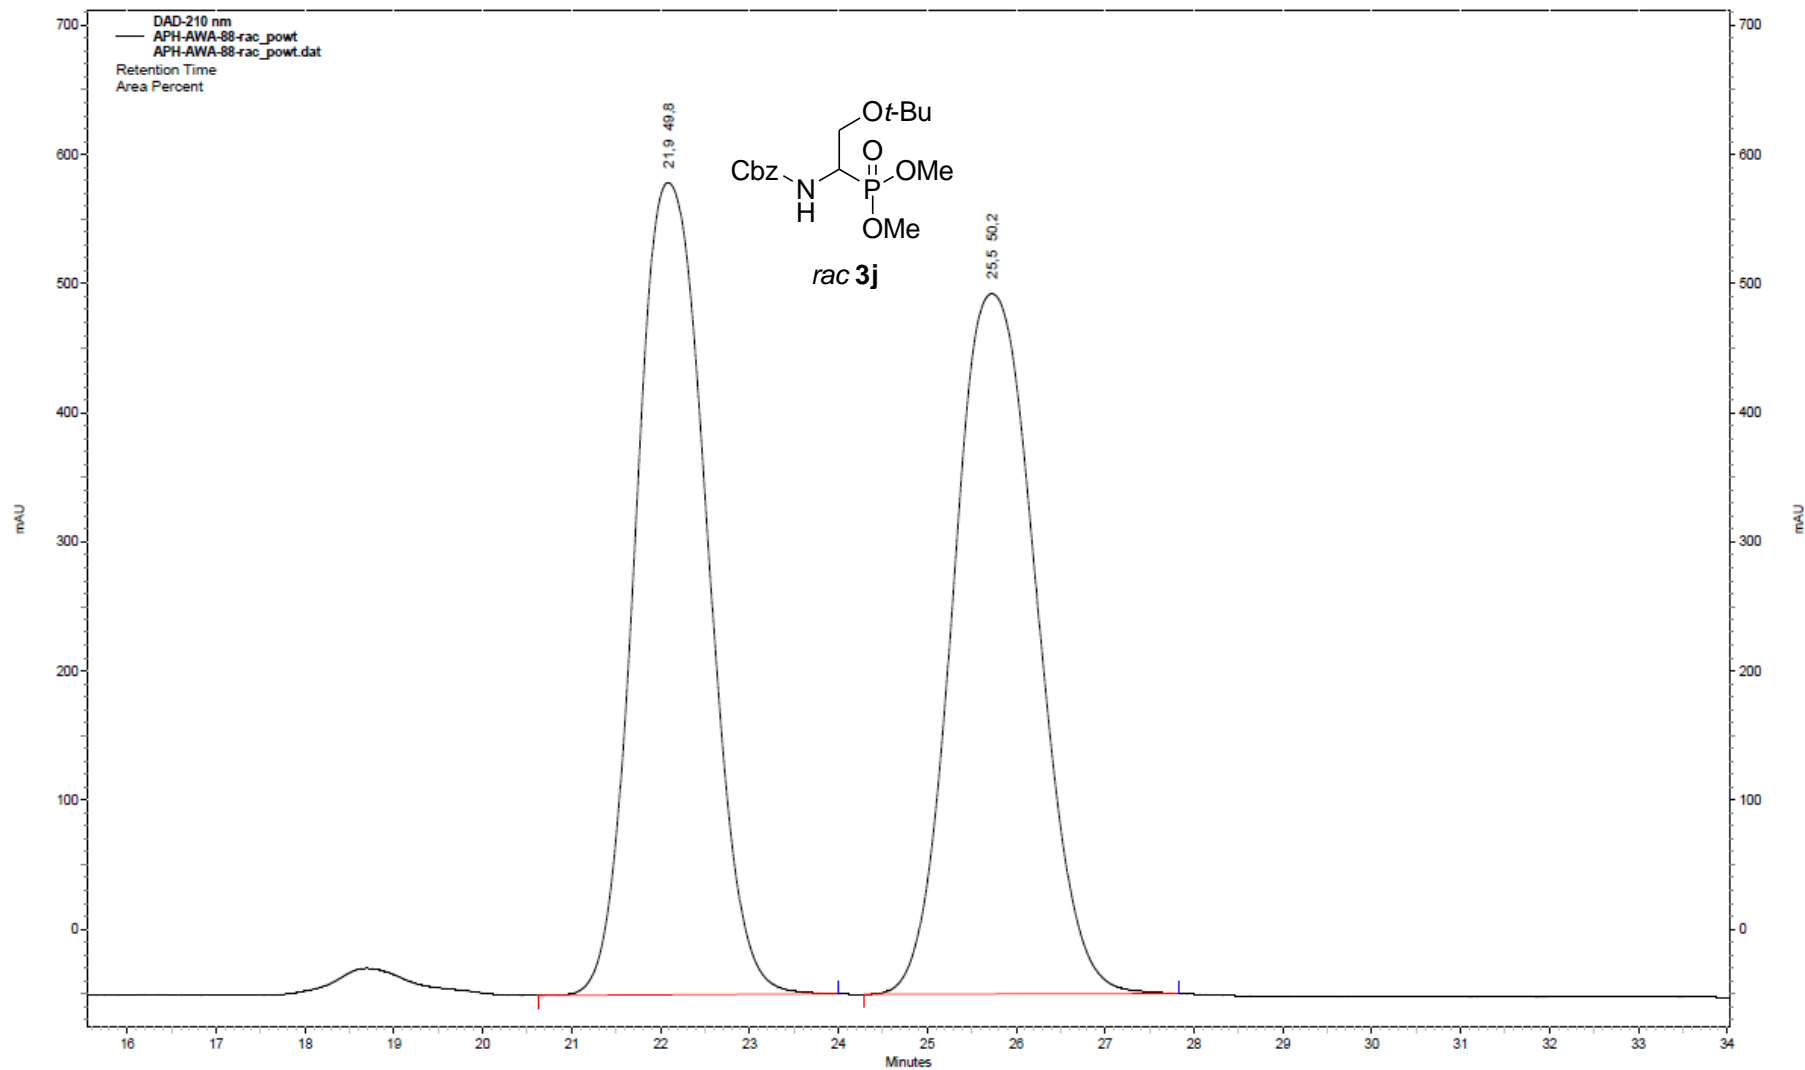

**HPLC conditions:**

Column: Chiralpak IA

Eluent: 10% *i*-PrOH/hexane

Flow: 0.75 mL/min

Detection: UV, 210 nm

**HPLC results for the catalyst 5**

| Signal | Retention time | % Area |
|--------|----------------|--------|
| 1      | 21.8           | 76.8   |
| 2      | 25.4           | 23.2   |

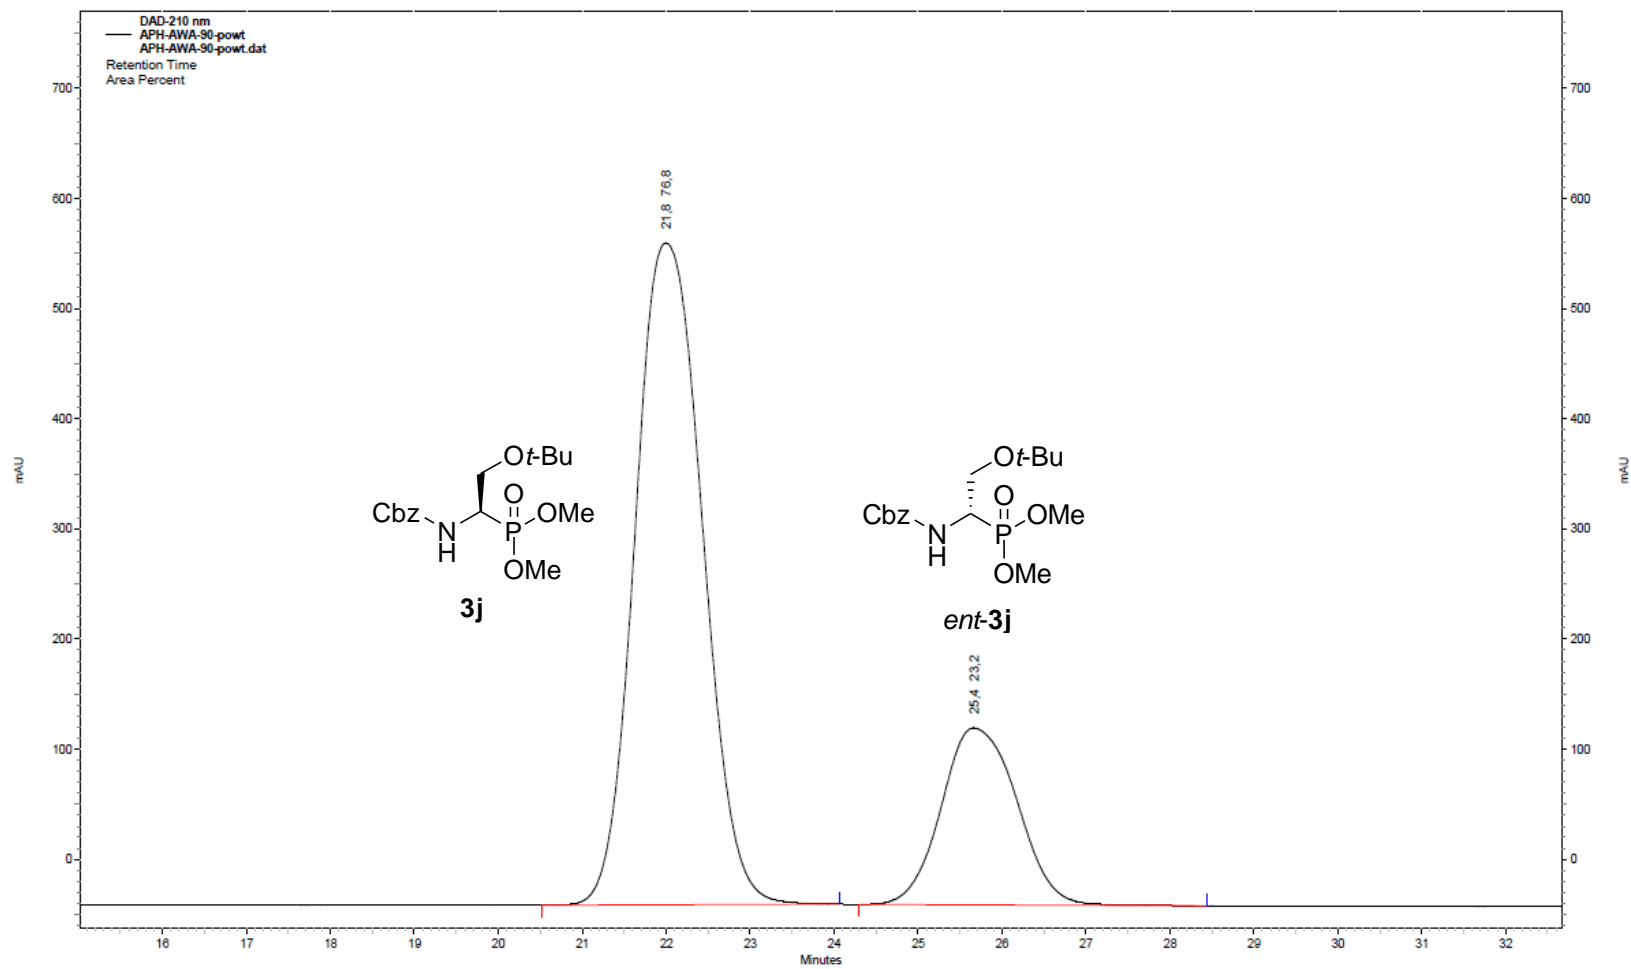

**HPLC conditions:**

Column: Chiralpak OD-H  
Eluent: 3% *i*-PrOH/hexane  
Flow: 0.5 mL/min  
Detection: UV, 212 nm

| Signal | Retention time | % Area |
|--------|----------------|--------|
| 1      | 53.1           | 50.3   |
| 2      | 60.0           | 49.6   |

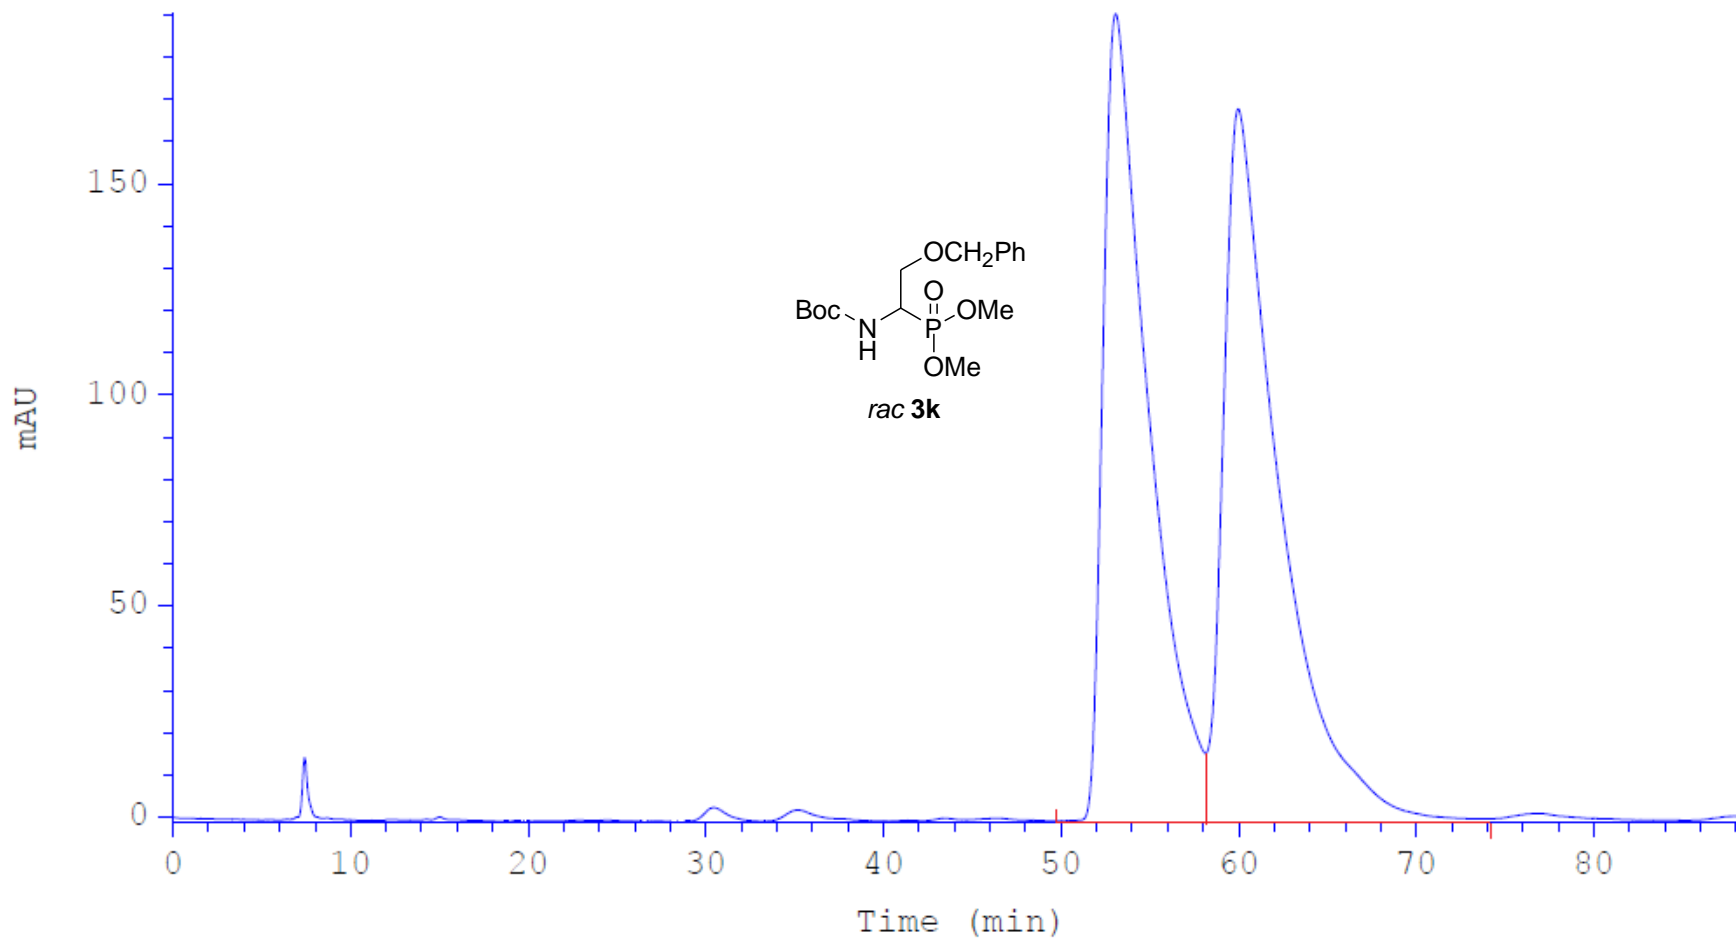

**HPLC conditions:**

Column: Chiralpak OD-H  
Eluent: 3% *i*-PrOH/hexane  
Flow: 0.5 mL/min  
Detection: UV, 212 nm

| HPLC results for the catalyst <b>5</b> |                |        |
|----------------------------------------|----------------|--------|
| Signal                                 | Retention time | % Area |
| 1                                      | 54.1           | 76.7   |
| 2                                      | 62.0           | 23.3   |

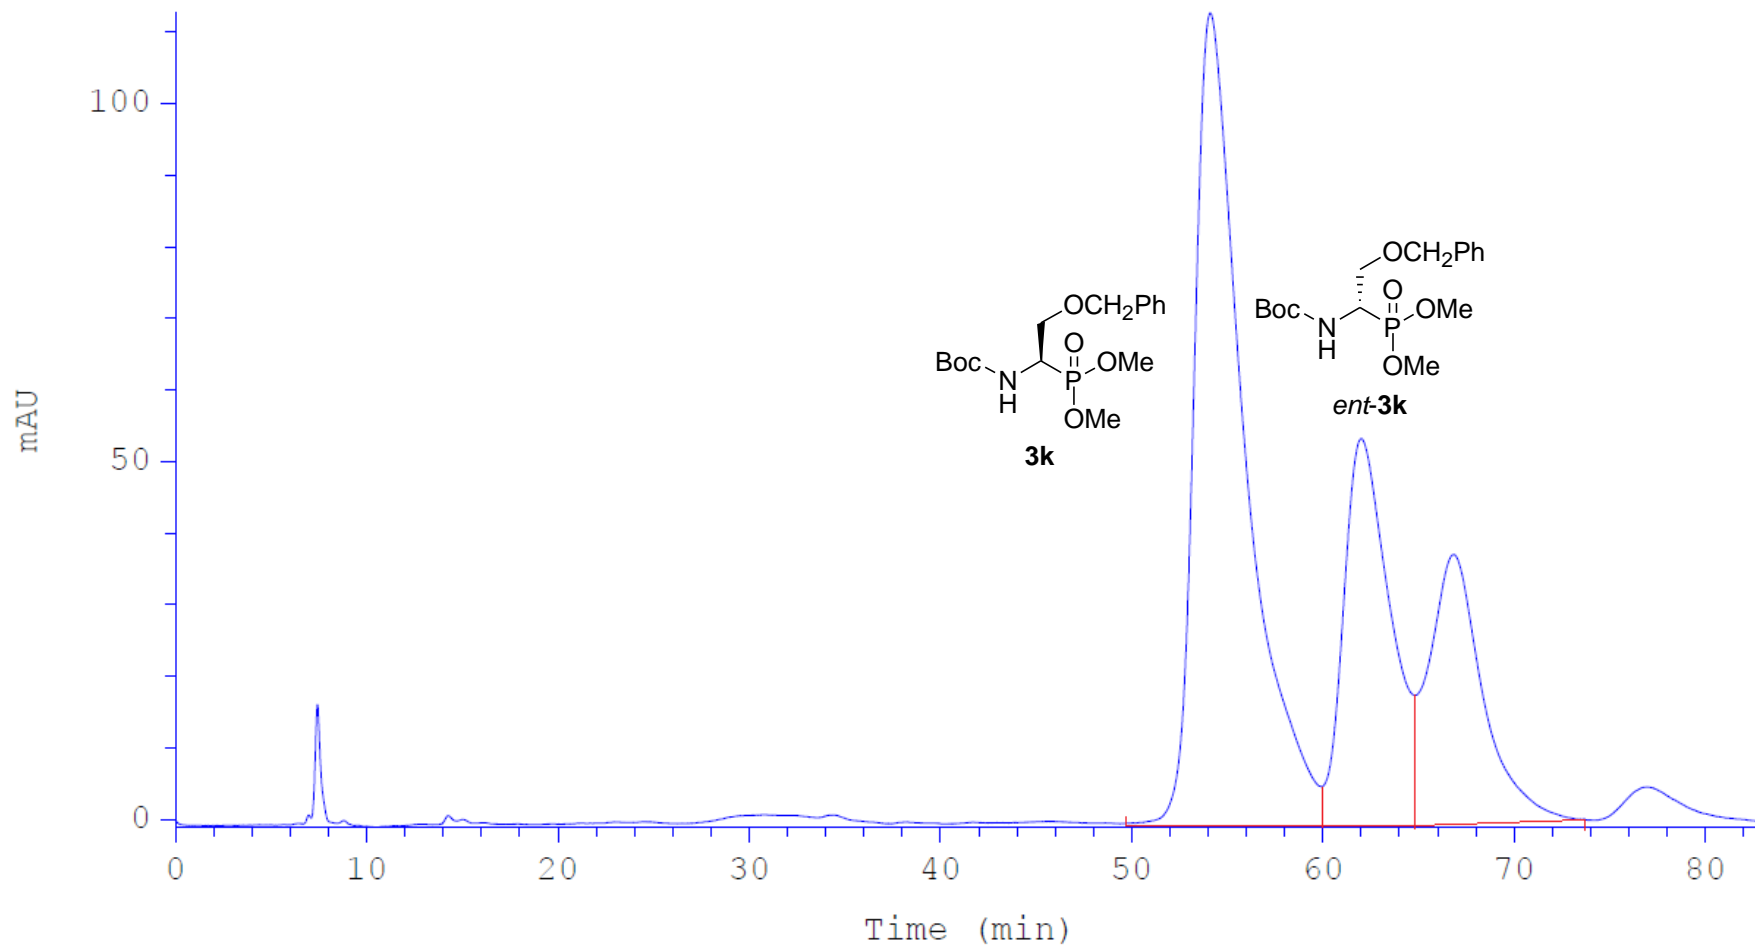

**HPLC conditions:**

Column: Chiralpak OD-H

Eluent: 3% *i*-PrOH/hexane

Flow: 0.5 mL/min

Detection: UV, 212 nm

| HPLC results for the catalyst <b>4</b> |                |        |
|----------------------------------------|----------------|--------|
| Signal                                 | Retention time | % Area |
| 1                                      | 53.6           | 70.9   |
| 2                                      | 61.3           | 29.1   |

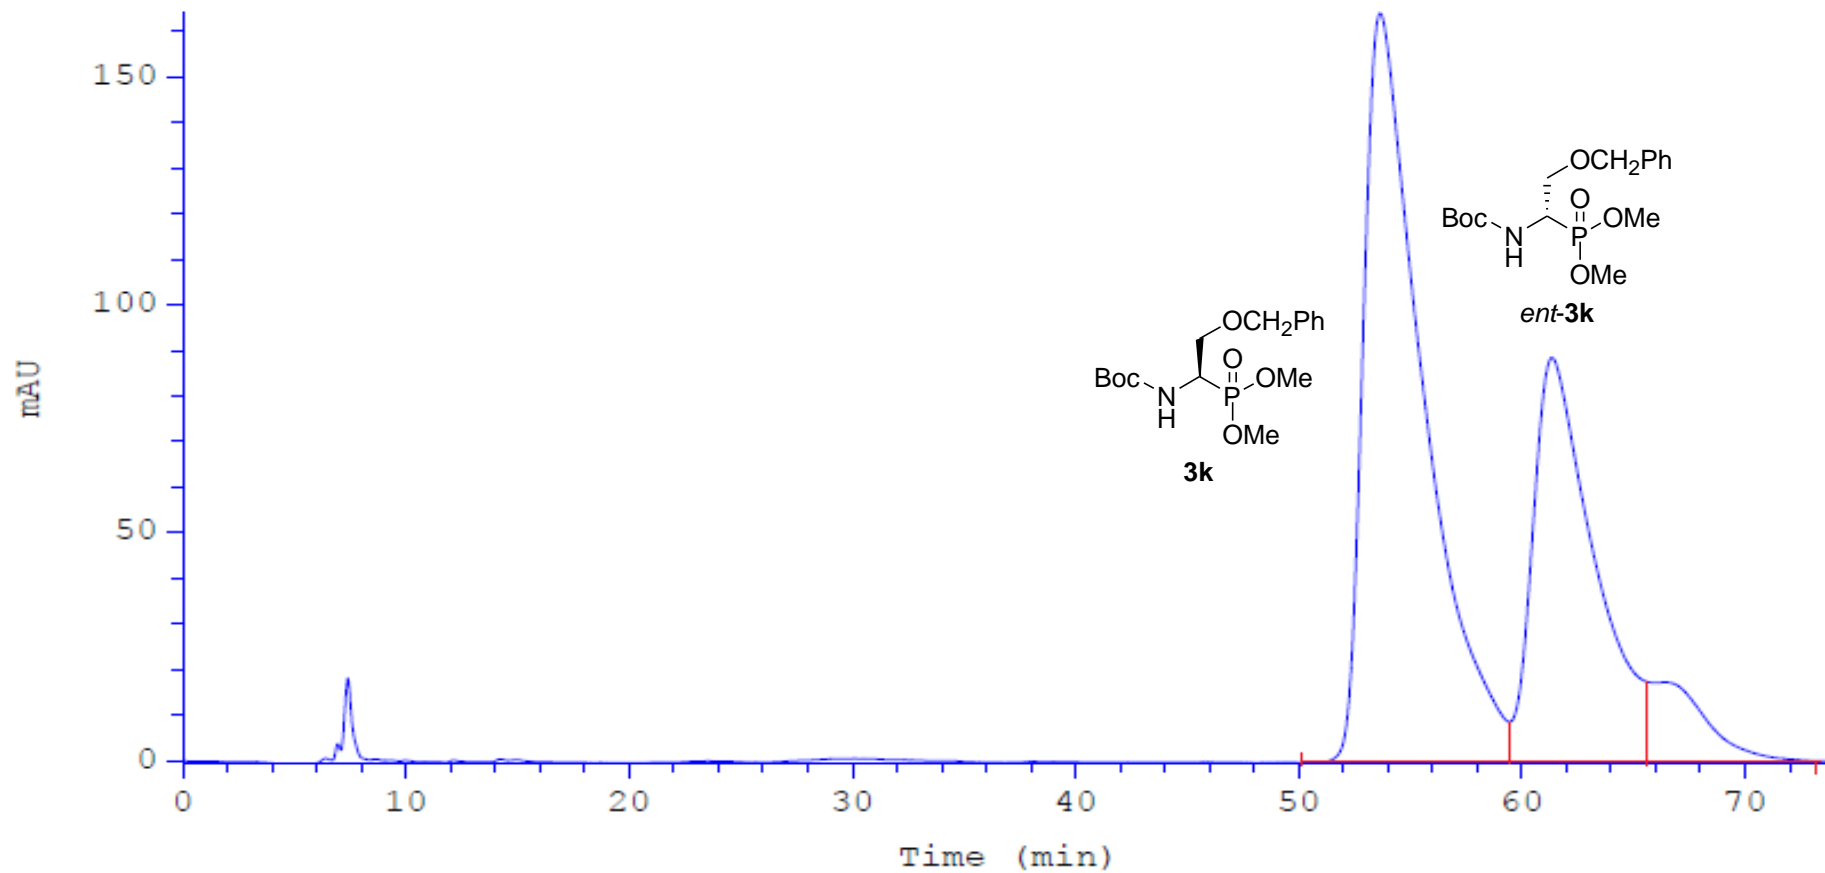

## SDE test via flash chromatography

Table S1.

| 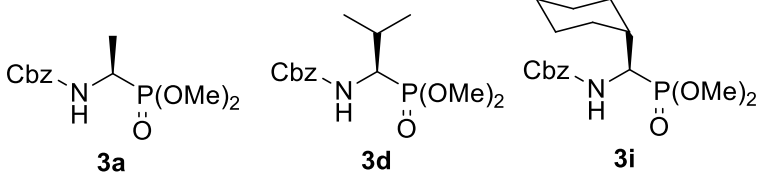      |                 |                       |                        |                      |
|-----------------------------------------------------------------------------------------|-----------------|-----------------------|------------------------|----------------------|
| Achiral flash chromatography on SiO <sub>2</sub> ; Eluent: hexane/EtOAc/acetone (5:3:2) |                 |                       |                        |                      |
| <i>Product</i>                                                                          | <i>Starting</i> | <i>First fraction</i> | <i>Middle fraction</i> | <i>Last fraction</i> |
| <b>3a</b>                                                                               | 83% ee          | 83% ee                | 83% ee                 | 83% ee               |
| <b>3d</b>                                                                               | 56% ee          | 56% ee                | 56% ee                 | 56% ee               |
| <b>3i</b>                                                                               | 65% ee          | 65% ee                | 65% ee                 | 65% ee               |

We conducted an appropriate SDE test for products **3a**, **3d** and **3i** via achiral flash chromatography. In the column chromatography process, we selected different fractions and measured the corresponding ee values. As shown in Table S1, the column chromatography doesn't change the ee value of the products. HPLC results have been illustrated below.



### HPLC conditions for compound 3a:

Column: Chiralpak AD-H

Eluent: 10% *i*-PrOH/hexane

Flow: 0.75 mL/min

Detection: UV, 210 nm

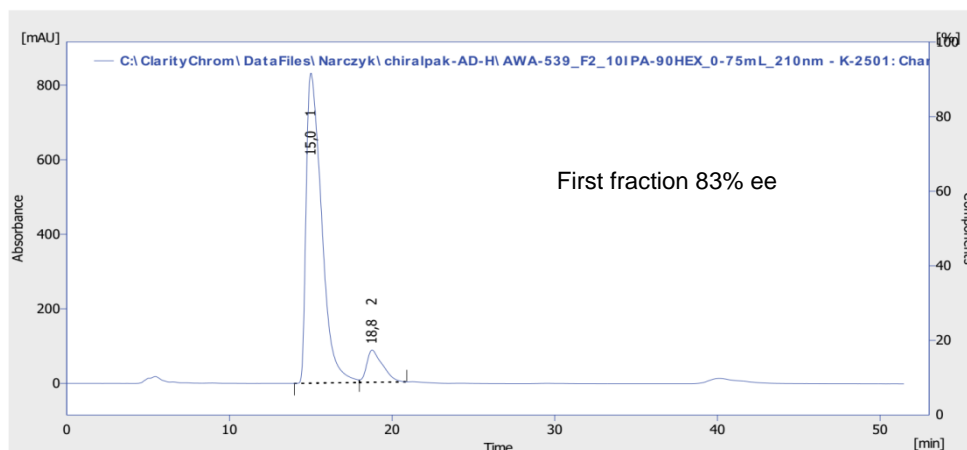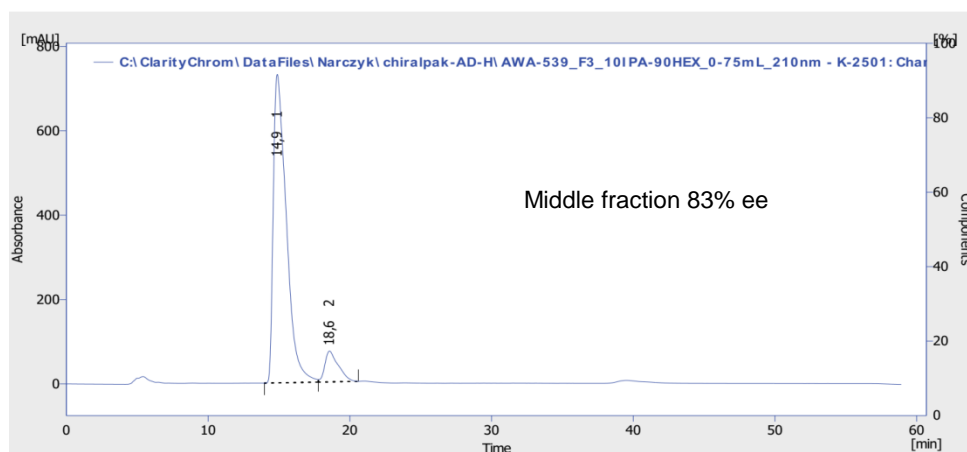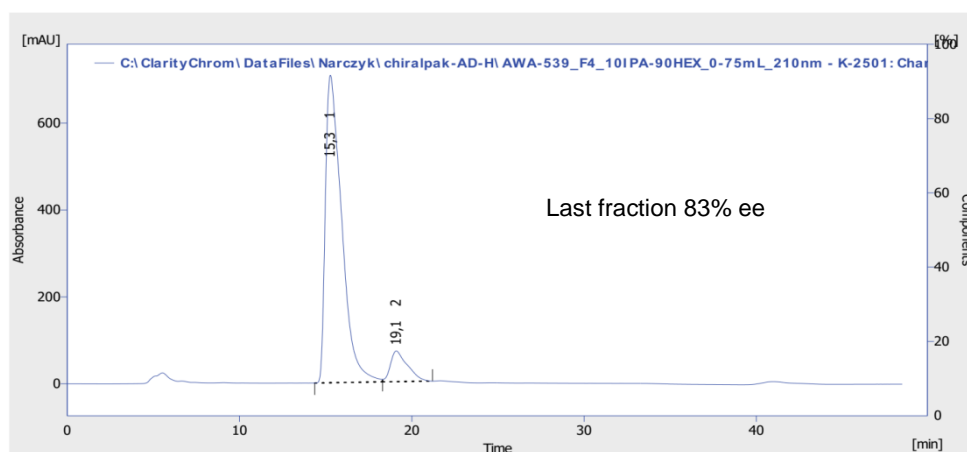

### HPLC conditions for compound 3d:

Column: Chiralpak AD-H

Eluent: 10% *i*-PrOH/hexane

Flow: 0.75 mL/min

Detection: UV, 210 nm

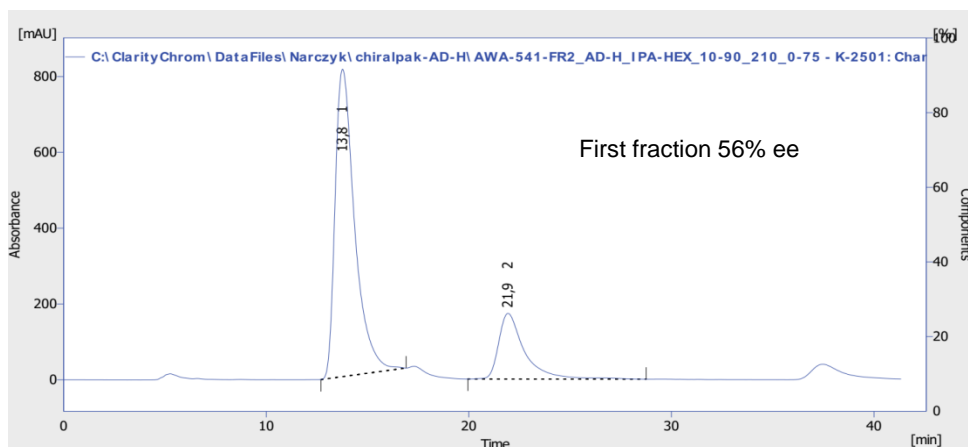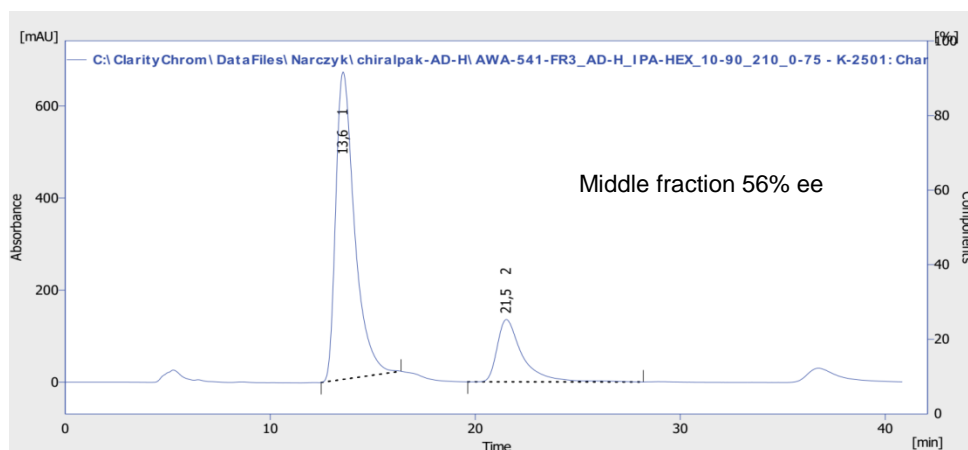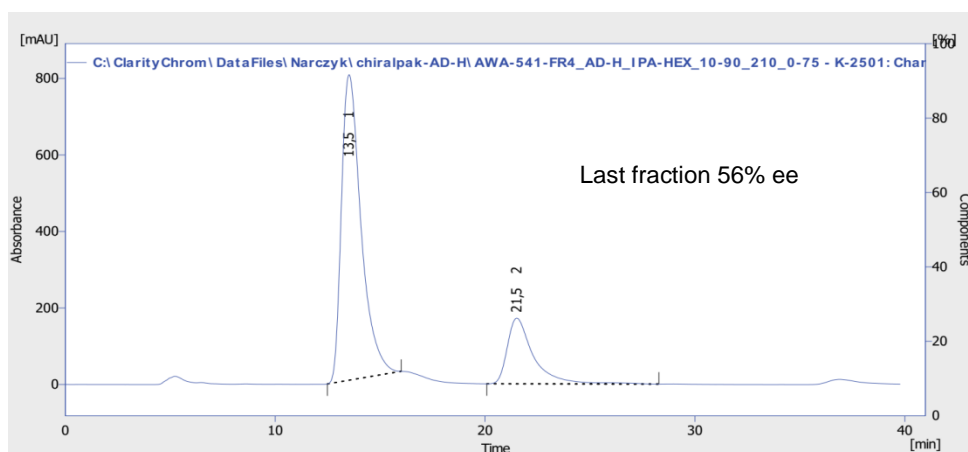

### HPLC conditions for compound 3i:

Column: Chiralpak ADH

Eluent: 15% *i*-PrOH/hexane

Flow: 0.75 mL/min

Detection: UV, 205 nm

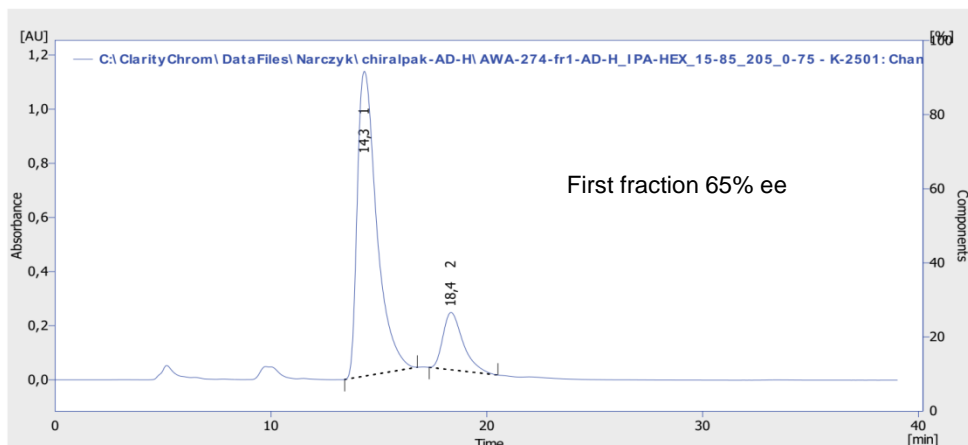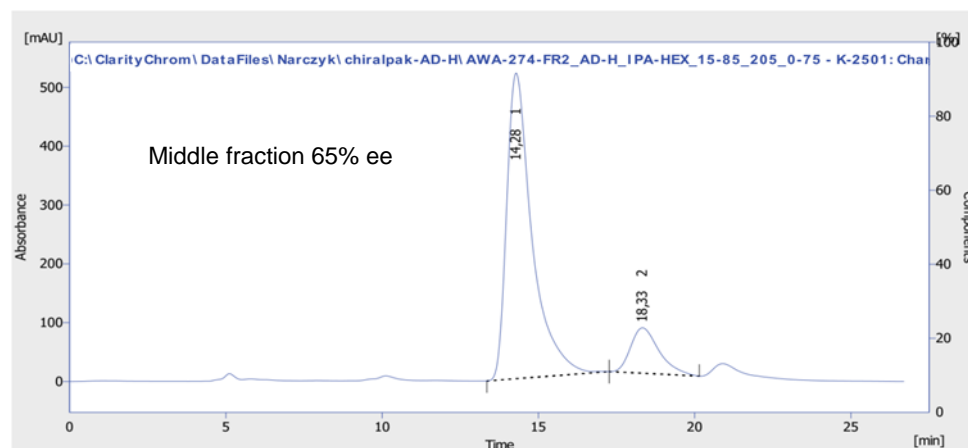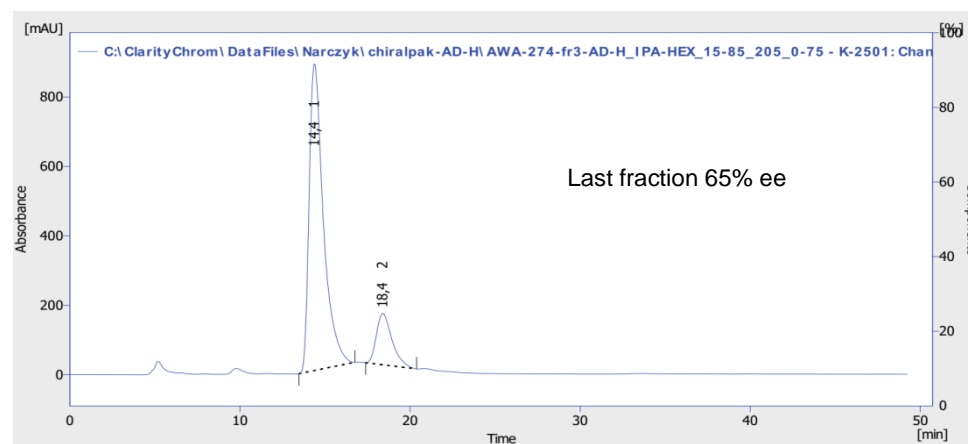

Supplement: molecules-25-00405-s001.pdf [file molecules-25-00405-s001.pdf]
